# Supplementary material for: The scavenging mechanism of hydrazone compounds towards HOO˙ and CH 3 OO˙ radicals: a computational mechanistic and kinetic study
Source: Royal Society of Chemistry journal article supplement (doi:10.1039/d4ra07625g), 2025-01-01
Supplement: d4ra07625g1.pdf [file d4ra07625g1.pdf]

## Supporting Information (SI)

### The scavenging mechanism of hydrazone compounds towards HOO• and CH<sub>3</sub>OO• radicals: A computational mechanistic and kinetic study

Chhinderpal Kaur and Debasish Mandal\*

Department of Chemistry and Biochemistry, Thapar Institute of Engineering and Technology,

Patiala-147004, Punjab, India

Corresponding author: [debasish.mandal@thapar.edu](mailto:debasish.mandal@thapar.edu)

| S. No. | Table of Contents                                                                                                                                                                                                                                        | Page No. |
|--------|----------------------------------------------------------------------------------------------------------------------------------------------------------------------------------------------------------------------------------------------------------|----------|
| 1.     | <b>Figure S1.</b> Optimized geometries of hydrazone compounds <b>1– 6</b> computed in the gas phase at the M062X/6-311+G(d,p) level of theory.                                                                                                           | 2        |
| 2.     | <b>Figure S2.</b> Frontiers molecular orbital (FMO) plots of Compound <b>1, 3,</b> and <b>5</b> calculated in the gas phase.                                                                                                                             | 3        |
| 3.     | <b>Figure S3.</b> Optimized geometries of TSs for HAT reactions between HOO• and their corresponding SOMO.                                                                                                                                               | 3        |
| 4.     | <b>Figure S4.</b> Optimized geometries of TSs of HAT reactions between HOO• and their corresponding SOMO.                                                                                                                                                | 4.       |
| 5.     | <b>Figure S5.</b> Optimized geometries of TSs of HAT reactions between CH <sub>3</sub> OO• and their corresponding SOMO.                                                                                                                                 | 5        |
| 6.     | <b>Figure S6.</b> Optimized geometries of TSs of HAT reactions between CH <sub>3</sub> OO• and their corresponding SOMO.                                                                                                                                 | 6        |
| 7.     | <b>Table S1.</b> The values of the enthalpies of e <sup>-</sup> , H <sup>+</sup> , and H• in the gas phase, water and pentyl ethanoate.                                                                                                                  | 6        |
| 8.     | <b>Table S2.</b> BDE values and ΔG° at 298.15 K of the reaction corresponding to HAT mechanism of compounds ( <b>1- 6</b> ) with HOO• and CH <sub>3</sub> OO• radicals in the gas phase calculated at the M062X/6-311+G (d, p) level of theory.          | 6-8      |
| 9.     | <b>Table S3.</b> ΔG° at 298.15 K of the reaction corresponding to SET and SPLET mechanisms of compounds ( <b>1- 6</b> ) with HOO• and CH <sub>3</sub> OO• radicals in the gas phase calculated at the M062X/6-311+G (d, p) level of theory.              | 8        |
| 10.    | <b>Table S4.</b> Calculated Free Energy (ΔG° in kcal mol <sup>-1</sup> at 298.15 K) of Reaction between Hydrazone Compounds ( <b>1-6</b> ) with HOO• and CH <sub>3</sub> OO• radicals via SET mechanism in the Water solvent.                            | 8        |
| 11.    | <b>Table S5.</b> Cartesian coordinates of all the reactants, radicals, cationic radicals, and anions including the thermochemical properties calculated at the M06-2X/6-311+G(d,p) level of theory in the gas phase.                                     | 9-39     |
| 12.    | <b>Table S6.</b> Cartesian coordinates of all the transition states and products of HAT reactions with HOO• and CH <sub>3</sub> OO• radicals including thermochemical properties calculated at the M06-2X/6-311+G(d,p) level of theory in the gas phase. | 39-78    |

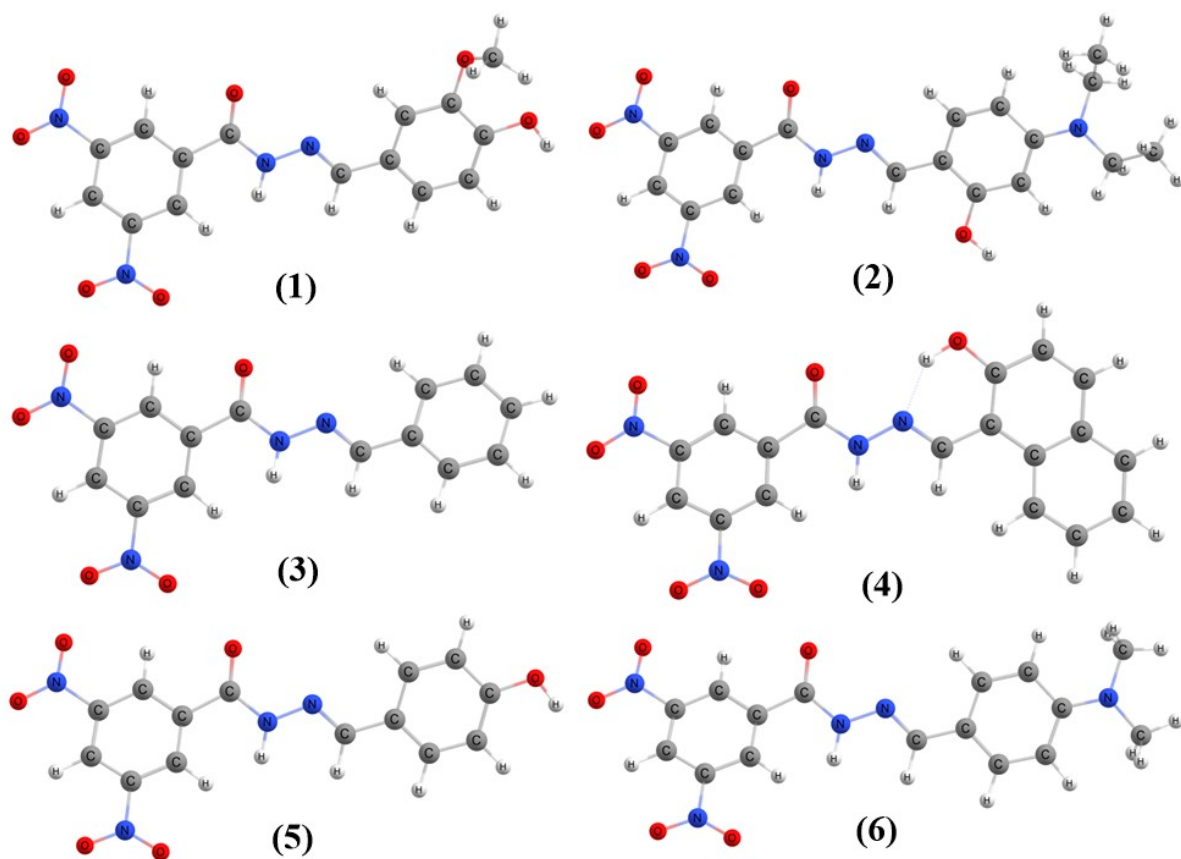

**Figure S1.** Optimized molecular geometries of hydrazone compounds **1– 6** computed in the gas phase at the M062X/6-311+G(d,p) level of theory.

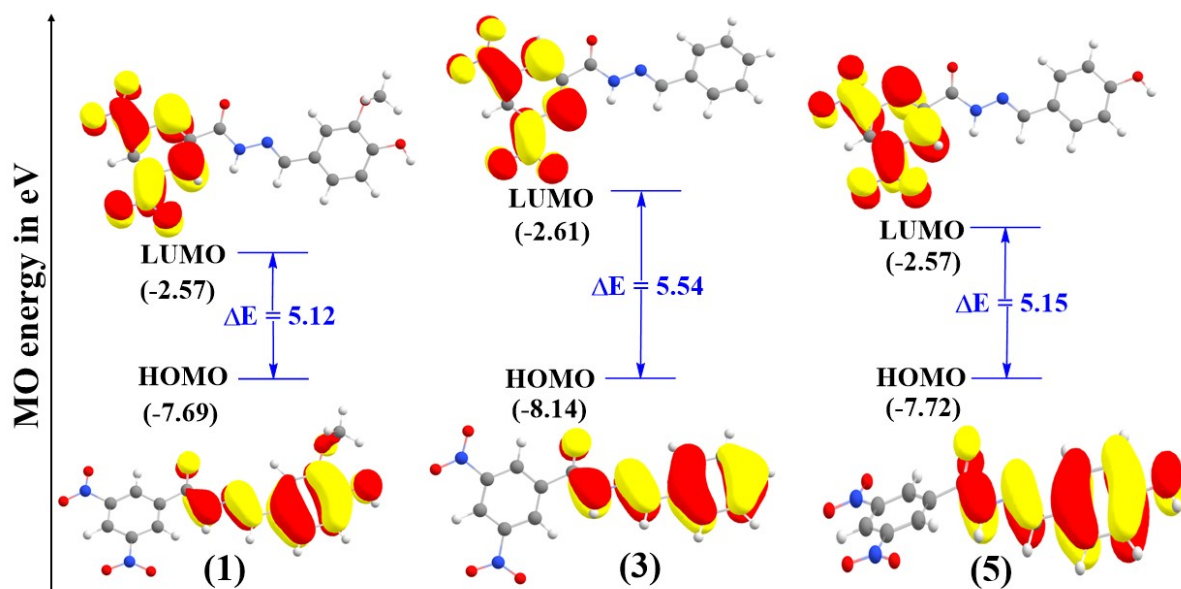

**Figure S2.** Frontiers molecular orbital (FMO) plots of Compound **1**, **3**, and **5** calculated in the gas phase.

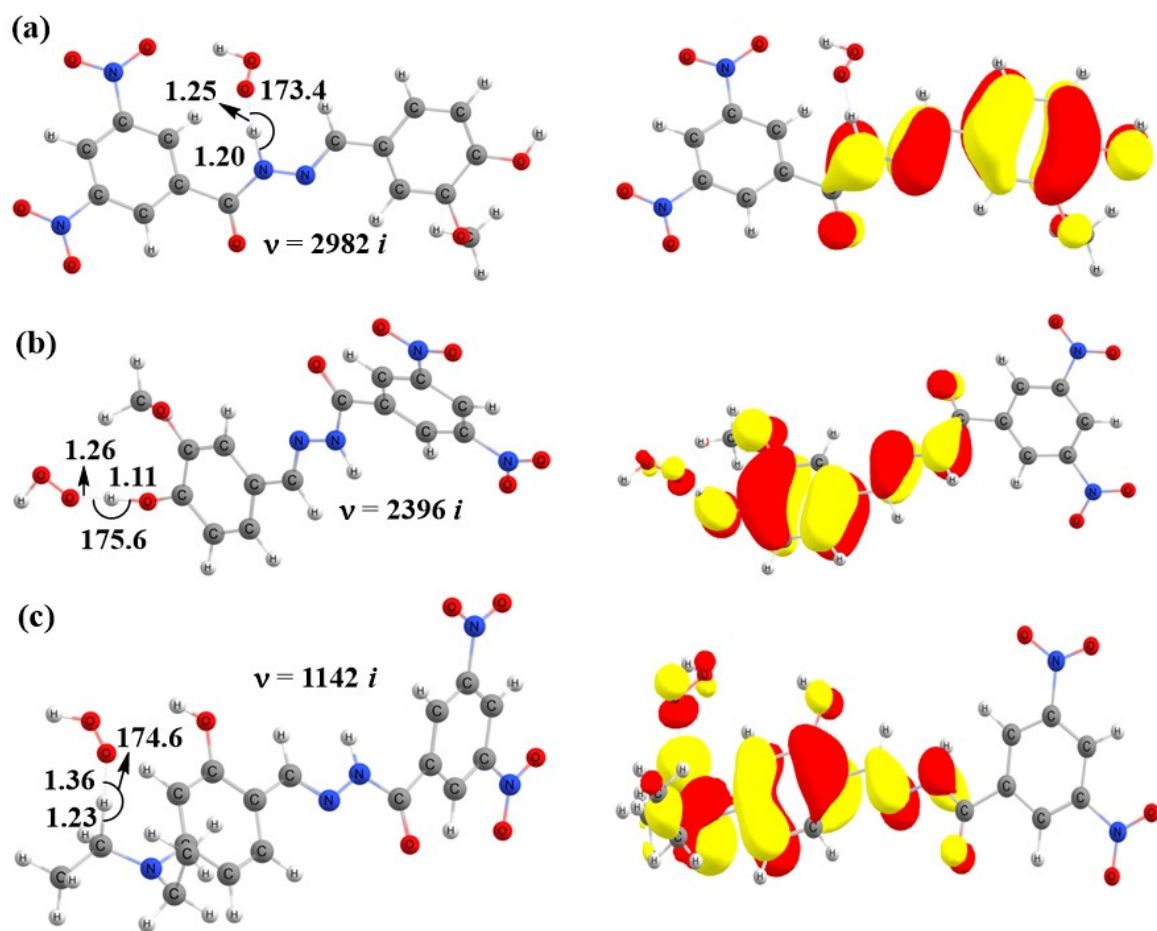

**Figure S3.** Optimized geometries of transition states of HAT reactions between  $\text{HOO}^\bullet$  and (a) TS-1-N8 (b) TS-1-O4' (c) TS-2-C7' and their corresponding SOMO distributions. (Bond angle in  $^\circ$ , Bond distance in  $\text{\AA}$ ).

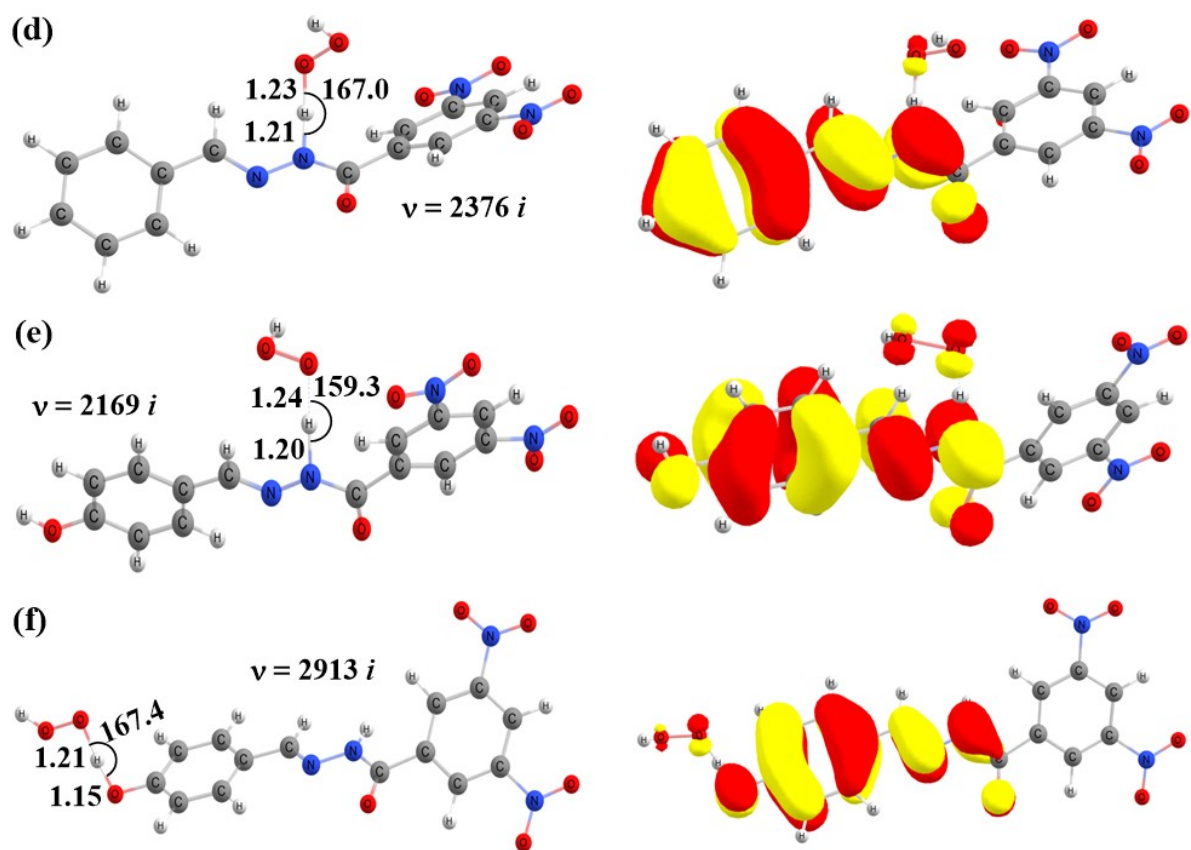

**Figure S4.** Optimized geometries of transition states of HAT reactions between HOO• and (d) TS-3-N8 (e) TS-5-N8 (f) TS-5-O4' and their corresponding SOMO distributions. ( Bond angle in °, Bond distance in Å).

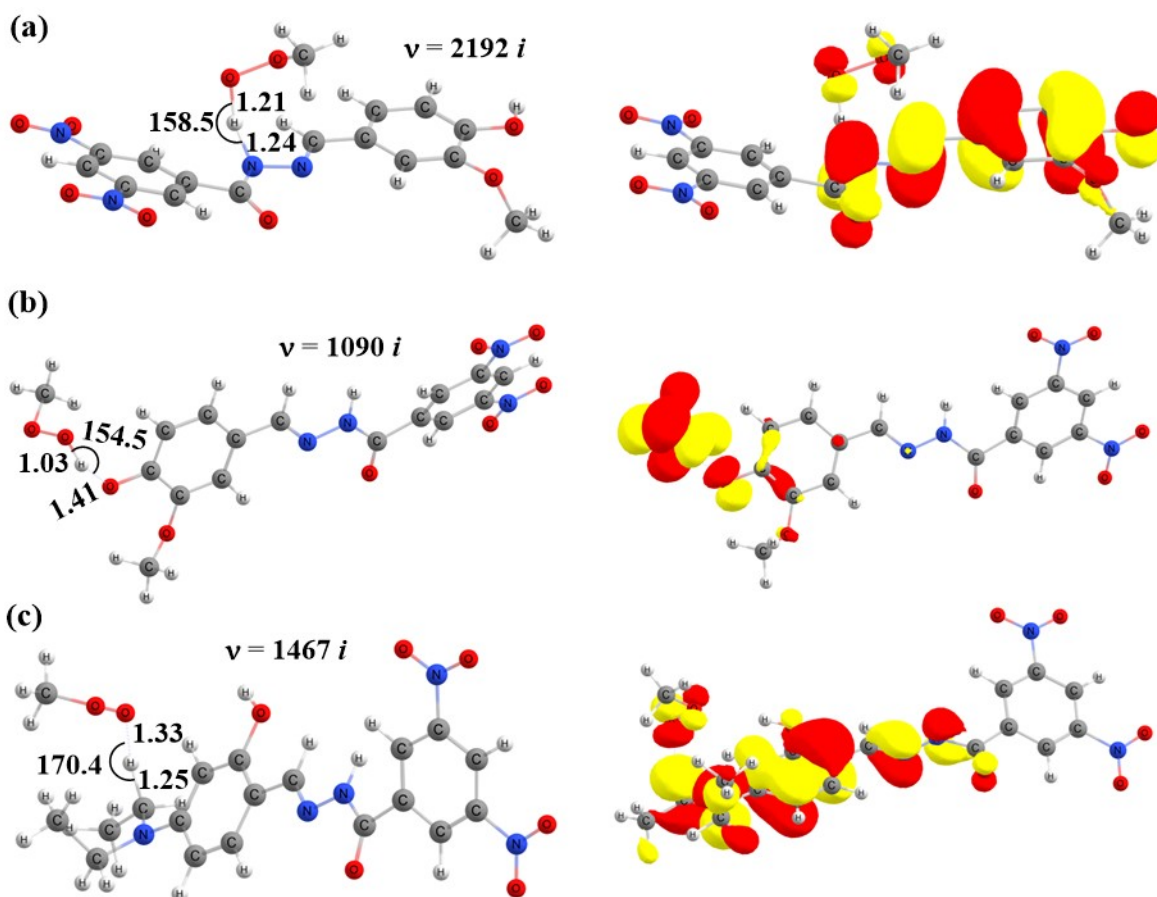

**Figure S5.** Optimized geometries of transition states of HAT reactions between  $\text{CH}_3\text{OO}^\bullet$  and (a) TS-1-N8 (b) TS-1-O4' (c) TS-2-C7'' and their corresponding SOMO distributions. (Bond angle in  $^\circ$ , Bond distance in  $\text{\AA}$ ).

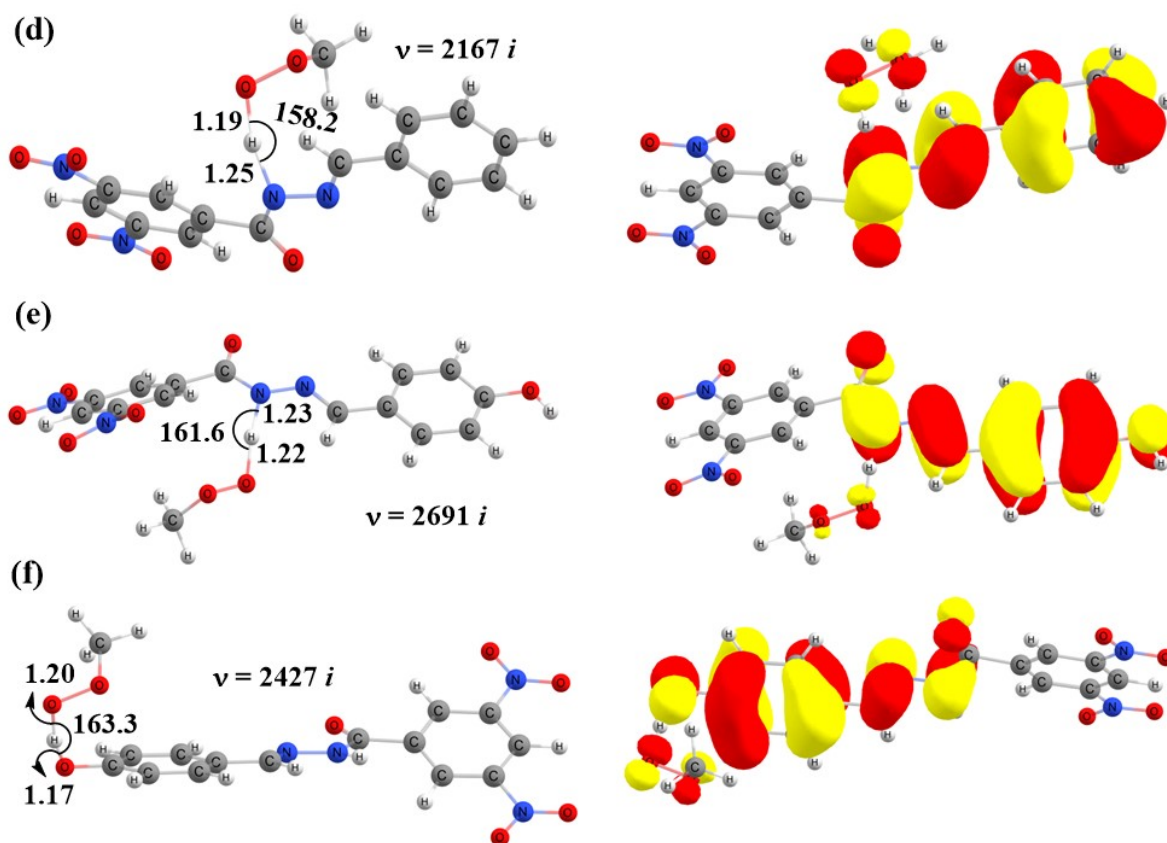

**Figure S6.** Optimized geometries of transition states of HAT reactions between  $\text{CH}_3\text{OO}^\bullet$  and (d) TS-3-N8 (e) TS-5-N8 (f) TS-5-O4' and their corresponding SOMO distributions. (Bond angle in  $^\circ$ , Bond distance in  $\text{\AA}$ ).

**Table S1.** The values of the enthalpies (in Hartree) of  $e^-$ ,  $\text{H}^+$ , and  $\text{H}^\bullet$  in the gas phase, water and pentyl ethanoate.

| Species                      | gas phase | water    | pentyl ethanoate |
|------------------------------|-----------|----------|------------------|
| $\text{H}(e^-)$              | 0.00120   | -0.03885 | -0.02403         |
| $\text{H}(\text{H}^+)$       | 0.00236   | -0.40331 | -0.3885          |
| $\text{H}(\text{H}^\bullet)$ | -0.49577  | -0.49364 | -0.49541         |

**Table S2.** BDE ( $\text{kcal mol}^{-1}$ ) values and Gibbs free energy ( $\Delta G^\circ$  in  $\text{kcal mol}^{-1}$  at 298.15 K) values of the reaction corresponding to HAT mechanism of compounds (1- 6) with  $\text{HOO}^\bullet$  and  $\text{CH}_3\text{OO}^\bullet$  radicals in the gas phase calculated at the M062X/6-311+G (d,p) level of theory.

| Compound | Positions | BDE   | $\Delta G^\circ$     |                                |
|----------|-----------|-------|----------------------|--------------------------------|
|          |           |       | $\text{HOO}^\bullet$ | $\text{CH}_3\text{OO}^\bullet$ |
| 1        | C2-H      | 116.8 | 31.1                 | 32.3                           |
|          | C4-H      | 117.2 | 31.6                 | 32.8                           |
|          | C6-H      | 111.9 | 26.0                 | 27.2                           |
|          | N8-H      | 87.9  | <b>1.5</b>           | <b>2.8</b>                     |
|          | C10-H     | 101.3 | 15.0                 | 16.2                           |

|          |       |       |              |             |
|----------|-------|-------|--------------|-------------|
|          | C2'-H | 114.9 | 29.1         | 30.3        |
|          | C3'-H | 97.2  | 11.4         | 12.7        |
|          | O4'-H | 81.2  | <b>- 4.4</b> | <b>-3.2</b> |
|          | C5'-H | 112.0 | 26.5         | 27.7        |
|          | C6'-H | 111.9 | 26.3         | 27.5        |
| <b>2</b> | C2-H  | 116.6 | 30.6         | 31.9        |
|          | C4-H  | 117.1 | 31.5         | 32.8        |
|          | C6-H  | 112.0 | 26.0         | 27.2        |
|          | N8-H  | 84.7  | <b>-1.2</b>  | <b>0.1</b>  |
|          | C10-H | 101.6 | 15.2         | 16.4        |
|          | O2'-H | 84.8  | <b>- 0.2</b> | <b>1.0</b>  |
|          | C3'-H | 108.9 | 22.6         | 23.8        |
|          | C5'-H | 108.4 | 22.2         | 23.4        |
|          | C6'-H | 112.4 | 26.6         | 27.8        |
|          | C7'-H | 88.5  | <b>2.5</b>   | <b>3.7</b>  |
| C8'-H    | 100.0 | 13.5  | 14.8         |             |
|          |       |       |              |             |
| <b>3</b> | C2-H  | 116.8 | 31.1         | 32.4        |
|          | C4-H  | 117.2 | 31.6         | 32.8        |
|          | C6-H  | 111.9 | 26.2         | 27.4        |
|          | N8-H  | 89.4  | <b>3.1</b>   | <b>4.3</b>  |
|          | C10-H | 101.5 | 14.7         | 15.9        |
|          | C2'-H | 112.9 | 27.4         | 28.6        |
|          | C3'-H | 111.3 | 25.8         | 27.0        |
|          | C4'-H | 111.3 | 25.8         | 27.0        |
|          | C5'-H | 111.4 | 25.9         | 27.1        |
|          | C6'-H | 111.3 | 25.8         | 27.0        |
|          |       |       |              |             |
| <b>4</b> | C2-H  | 116.8 | 30.7         | 32.0        |
|          | C4-H  | 117.2 | 31.6         | 32.9        |
|          | C6-H  | 112.0 | 25.8         | 27.0        |
|          | N8-H  | 83.3  | <b>-1.8</b>  | <b>-0.6</b> |
|          | C10-H | 99.7  | 13.9         | 15.1        |
|          | O2'-H | 96.6  | 10.7         | 11.9        |
|          | C3'-H | 113.8 | 28.3         | 29.6        |
|          | C4'-H | 111.3 | 25.7         | 26.9        |
|          | C5'-H | 111.4 | 25.7         | 27.0        |
|          | C6'-H | 111.8 | 26.2         | 27.5        |
|          | C7'-H | 110.9 | 25.3         | 26.5        |
|          | C8'-H | 108.2 | 22.9         | 24.1        |
|          |       |       |              |             |
| <b>5</b> | C2-H  | 116.8 | 31.3         | 32.6        |
|          | C4-H  | 117.1 | 31.5         | 32.7        |
|          | C6-H  | 111.9 | 26.2         | 27.4        |
|          | N8-H  | 87.9  | <b>2.1</b>   | <b>3.3</b>  |
|          | C10-H | 101.2 | 14.7         | 15.9        |
|          | C2'-H | 113.0 | 27.5         | 28.7        |
|          | C3'-H | 113.7 | 28.0         | 29.3        |

|          |       |       |              |            |
|----------|-------|-------|--------------|------------|
|          | O4'-H | 87.1  | <b>2.0</b>   | <b>3.2</b> |
|          | C5'-H | 112.3 | 26.8         | 28.0       |
|          | C6'-H | 111.4 | 25.8         | 27.0       |
|          |       |       |              |            |
| <b>6</b> | C2-H  | 116.7 | 31.0         | 32.2       |
|          | C4-H  | 117.1 | 31.5         | 32.7       |
|          | C6-H  | 112.0 | 26.1         | 27.3       |
|          | N8-H  | 84.8  | <b>- 0.6</b> | <b>0.6</b> |
|          | C10-H | 100.9 | 13.0         | 14.2       |
|          | C2'-H | 112.3 | 26.3         | 27.6       |
|          | C3'-H | 109.7 | 24.4         | 25.6       |
|          | C5'-H | 134.8 | 49.8         | 51.0       |
|          | C6'-H | 110.7 | 24.8         | 26.0       |
| C7'-H    | 90.0  | 5.2   | 6.5          |            |

**Table S3.** The Gibbs free energy ( $\Delta G^\circ$  in kcal mol<sup>-1</sup> at 298.15 K) values of the reaction corresponding to SET and SPLET mechanisms of compounds (1- 6) with HOO• and CH<sub>3</sub>OO• radicals in the gas phase calculated at the M062X/6-311+G (d, p) level of theory.

| Compound | $\Delta G^\circ$ |                     | Sites | $\Delta G^\circ$ |                     |
|----------|------------------|---------------------|-------|------------------|---------------------|
|          | SET              |                     |       | SPLET            |                     |
|          | HOO•             | CH <sub>3</sub> OO• |       | HOO•             | CH <sub>3</sub> OO• |
| <b>1</b> | 160.5            | 158.8               | N8-H  | 166.0            | 146.7               |
|          |                  |                     | O4'-H | 171.4            | 152.0               |
| <b>2</b> | 139.1            | 137.4               | N8-H  | 171.5            | 152.1               |
|          |                  |                     | O2'-H | 175.1            | 155.7               |
| <b>3</b> | 172.2            | 170.5               | N8-H  | 165.3            | 145.9               |
| <b>4</b> | 157.2            | 155.5               | N8-H  | 158.2            | 138.8               |
|          |                  |                     | O2'-H | 182.9            | 163.6               |
| <b>5</b> | 163.6            | 161.9               | N8-H  | 166.3            | 146.9               |
|          |                  |                     | O4'-H | 174.3            | 154.9               |
| <b>6</b> | 144.0            | 142.3               | N8-H  | 170.0            | 150.7               |

**Table S4.** Calculated Free Energy ( $\Delta G^\circ$  in kcal mol<sup>-1</sup> at 298.15 K) of reaction between Hydrazone Compounds (1-6) with HOO• and CH<sub>3</sub>OO• radicals via SET mechanism in the Water solvent.

| Compounds <sup>a</sup> | $\Delta G^\circ$ |                     |
|------------------------|------------------|---------------------|
|                        | HOO•             | CH <sub>3</sub> OO• |
| 1                      | 33.0             | 34.8                |
| 2                      | 13.7             | 15.5                |
| 3                      | 40.8             | 42.6                |
| 4                      | 30.2             | 32.0                |
| 5                      | 33.4             | 35.2                |
| 6                      | 15.9             | 17.7                |
| Anions                 |                  |                     |



|       |      |      |
|-------|------|------|
| 1-O4' | 7.1  | 8.9  |
| 2-O2' | 4.1  | 5.9  |
| 3-N8  | 14.7 | 16.5 |
| 4-N8  | 13.8 | 15.6 |
| 5-O4' | 7.6  | 9.4  |
| 6-N8  | 6.0  | 7.8  |

<sup>a</sup> = Neutral molecule

**Table S5.** Cartesian coordinates of all the reactants, radicals, cationic radicals, and anions including the zero point energy, ZPE, enthalpy, H, free energy, G, imaginary frequency calculated at the M06-2X/6-311+G(d,p) level of theory in the gas phase.

**N'-(4-Hydroxy-3-methoxybenzylidene)-3,5-dinitrobenzohydrazide (1)**

|                                            |              |              |                             |
|--------------------------------------------|--------------|--------------|-----------------------------|
| C                                          | 5.071834000  | -0.255762000 | -0.008302000                |
| C                                          | 4.113015000  | -1.215238000 | -0.272735000                |
| C                                          | 2.757046000  | -0.929844000 | -0.339643000                |
| C                                          | 2.335424000  | 0.378472000  | -0.125096000                |
| C                                          | 3.273612000  | 1.379186000  | 0.125270000                 |
| C                                          | 4.612132000  | 1.036759000  | 0.187007000                 |
| H                                          | 6.124561000  | -0.498868000 | 0.037853000                 |
| H                                          | 2.070565000  | -1.729322000 | -0.587743000                |
| H                                          | 2.953184000  | 2.404716000  | 0.260715000                 |
| C                                          | 0.890448000  | 0.807629000  | -0.207753000                |
| O                                          | 0.590394000  | 1.928091000  | -0.529022000                |
| N                                          | -0.005472000 | -0.180297000 | 0.117325000                 |
| H                                          | 0.322092000  | -1.039188000 | 0.547388000                 |
| N                                          | -1.342543000 | 0.066004000  | 0.057682000                 |
| C                                          | -2.110578000 | -0.856373000 | 0.482184000                 |
| C                                          | -3.566640000 | -0.716190000 | 0.461414000                 |
| C                                          | -4.361553000 | -1.765257000 | 0.915466000                 |
| C                                          | -5.747275000 | -1.652725000 | 0.906373000                 |
| C                                          | -6.350184000 | -0.488774000 | 0.447709000                 |
| C                                          | -5.553193000 | 0.573741000  | -0.021469000                |
| C                                          | -4.177735000 | 0.453425000  | -0.009053000                |
| H                                          | -3.901791000 | -2.676936000 | 1.280867000                 |
| H                                          | -6.365218000 | -2.468445000 | 1.267704000                 |
| H                                          | -3.575148000 | 1.283129000  | -0.359438000                |
| O                                          | -6.128085000 | 1.738941000  | -0.430401000                |
| O                                          | -7.694665000 | -0.306552000 | 0.432923000                 |
| H                                          | -8.133047000 | -1.073465000 | 0.812006000                 |
| C                                          | -6.819684000 | 1.653766000  | -1.673805000                |
| H                                          | -7.642078000 | 0.938423000  | -1.615946000                |
| H                                          | -7.212273000 | 2.648697000  | -1.872725000                |
| H                                          | -6.126797000 | 1.366449000  | -2.470254000                |
| N                                          | 5.609765000  | 2.098133000  | 0.470589000                 |
| O                                          | 5.188847000  | 3.215899000  | 0.652225000                 |
| O                                          | 6.772431000  | 1.766175000  | 0.501375000                 |
| N                                          | 4.553935000  | -2.611161000 | -0.503260000                |
| O                                          | 5.741864000  | -2.828354000 | -0.476031000                |
| O                                          | 3.690083000  | -3.437052000 | -0.698737000                |
| H                                          | -1.710813000 | -1.798029000 | 0.879174000                 |
| Zero-point correction=                     |              |              | 0.273423 (Hartree/Particle) |
| Thermal correction to Energy=              |              |              | 0.296701                    |
| Thermal correction to Enthalpy=            |              |              | 0.297646                    |
| Thermal correction to Gibbs Free Energy=   |              |              | 0.216417                    |
| Sum of electronic and zero-point Energies= |              |              | -1323.734896                |
| Sum of electronic and thermal Energies=    |              |              | -1323.711618                |
| Sum of electronic and thermal Enthalpies=  |              |              | -1323.710673                |

Sum of electronic and thermal Free Energies= -1323.791902

### OOH

|                                              |              |              |                             |
|----------------------------------------------|--------------|--------------|-----------------------------|
| O                                            | 0.054943000  | -0.599131000 | 0.000000000                 |
| H                                            | -0.879090000 | -0.872954000 | 0.000000000                 |
| O                                            | 0.054943000  | 0.708250000  | 0.000000000                 |
| Zero-point correction=                       |              |              | 0.014604 (Hartree/Particle) |
| Thermal correction to Energy=                |              |              | 0.017456                    |
| Thermal correction to Enthalpy=              |              |              | 0.018400                    |
| Thermal correction to Gibbs Free Energy=     |              |              | -0.007537                   |
| Sum of electronic and zero-point Energies=   |              |              | -150.875902                 |
| Sum of electronic and thermal Energies=      |              |              | -150.873050                 |
| Sum of electronic and thermal Enthalpies=    |              |              | -150.872106                 |
| Sum of electronic and thermal Free Energies= |              |              | -150.898043                 |

### CH<sub>3</sub>OO

|                                              |              |              |              |
|----------------------------------------------|--------------|--------------|--------------|
| C                                            | -0.988804000 | -0.481863000 | 0.000000000  |
| H                                            | -1.950937000 | 0.025683000  | 0.000000000  |
| H                                            | -0.862976000 | -1.088013000 | 0.896509000  |
| H                                            | -0.862976000 | -1.088013000 | -0.896509000 |
| O                                            | 1.201214000  | 0.070962000  | 0.000000000  |
| O                                            | 0.000000000  | 0.559228000  | 0.000000000  |
| Zero-point correction=                       |              |              | 0.043745     |
| (Hartree/Particle)                           |              |              |              |
| Thermal correction to Energy=                |              |              | 0.047541     |
| Thermal correction to Enthalpy=              |              |              | 0.048485     |
| Thermal correction to Gibbs Free Energy=     |              |              | 0.018132     |
| Sum of electronic and zero-point Energies=   |              |              | -190.144321  |
| Sum of electronic and thermal Energies=      |              |              | -190.140525  |
| Sum of electronic and thermal Enthalpies=    |              |              | -190.139581  |
| Sum of electronic and thermal Free Energies= |              |              | -190.169934  |

### BHA

|   |              |              |              |
|---|--------------|--------------|--------------|
| C | -2.016291000 | 1.124905000  | 0.000089000  |
| C | -1.862870000 | -0.252529000 | 0.000222000  |
| C | -0.579526000 | -0.806305000 | 0.000217000  |
| C | 0.573925000  | -0.032331000 | 0.000147000  |
| C | 0.397382000  | 1.367870000  | 0.000068000  |
| C | -0.871161000 | 1.921769000  | 0.000016000  |
| H | -2.990224000 | 1.594283000  | 0.000110000  |
| H | -0.523815000 | -1.886239000 | 0.000146000  |
| H | -0.977924000 | 3.002633000  | 0.000056000  |
| O | 1.508784000  | 2.175045000  | 0.000144000  |
| H | 1.230312000  | 3.094301000  | -0.001288000 |
| O | -2.891234000 | -1.148667000 | 0.000398000  |
| C | -4.200908000 | -0.627868000 | -0.000433000 |
| H | -4.869645000 | -1.485775000 | -0.000699000 |
| H | -4.387634000 | -0.022203000 | 0.892666000  |
| H | -4.386588000 | -0.022465000 | -0.893928000 |
| C | 1.969030000  | -0.666837000 | -0.000078000 |
| C | 2.738540000  | -0.237747000 | -1.262672000 |
| C | 2.738800000  | -0.237634000 | 1.262355000  |
| C | 1.893854000  | -2.198364000 | 0.000003000  |
| H | 2.201415000  | -0.554511000 | -2.160658000 |
| H | 2.876705000  | 0.841474000  | -1.302204000 |
| H | 3.723433000  | -0.713570000 | -1.269746000 |
| H | 3.723930000  | -0.712997000 | 1.268996000  |
| H | 2.876536000  | 0.841640000  | 1.302069000  |
| H | 2.202120000  | -0.554846000 | 2.160436000  |

|   |             |              |              |
|---|-------------|--------------|--------------|
| H | 1.383744000 | -2.579969000 | 0.888059000  |
| H | 1.383686000 | -2.580097000 | -0.887962000 |
| H | 2.908900000 | -2.602250000 | 0.000000000  |

Zero-point correction=  
(Hartree/Particle)

0.251543

|                                              |             |
|----------------------------------------------|-------------|
| Thermal correction to Energy=                | 0.264988    |
| Thermal correction to Enthalpy=              | 0.265932    |
| Thermal correction to Gibbs Free Energy=     | 0.212860    |
| Sum of electronic and zero-point Energies=   | -578.900286 |
| Sum of electronic and thermal Energies=      | -578.886841 |
| Sum of electronic and thermal Enthalpies=    | -578.885897 |
| Sum of electronic and thermal Free Energies= | -578.938969 |

### 1-N8-H Radical

|   |              |              |              |
|---|--------------|--------------|--------------|
| C | 5.024186000  | 0.232235000  | -0.007468000 |
| C | 4.058177000  | 1.221653000  | 0.031045000  |
| C | 2.698427000  | 0.952016000  | 0.047148000  |
| C | 2.282280000  | -0.377518000 | 0.024139000  |
| C | 3.224258000  | -1.404709000 | -0.014751000 |
| C | 4.567935000  | -1.075703000 | -0.029519000 |
| H | 6.079706000  | 0.466438000  | -0.019638000 |
| H | 1.980528000  | 1.759329000  | 0.078405000  |
| H | 2.903546000  | -2.438774000 | -0.032648000 |
| C | 0.828240000  | -0.760550000 | 0.036631000  |
| O | 0.482270000  | -1.914752000 | 0.027625000  |
| N | -0.029514000 | 0.365629000  | 0.072953000  |
| N | -1.279651000 | 0.022901000  | -0.000083000 |
| C | -2.102013000 | 1.059636000  | 0.053612000  |
| C | -3.515981000 | 0.879281000  | -0.018204000 |
| C | -4.359167000 | 2.001612000  | 0.052864000  |
| C | -5.731009000 | 1.851520000  | -0.015272000 |
| C | -6.287953000 | 0.579932000  | -0.159373000 |
| C | -5.453241000 | -0.560016000 | -0.223420000 |
| C | -4.088575000 | -0.404515000 | -0.155826000 |
| H | -3.927703000 | 2.990199000  | 0.159805000  |
| H | -6.383434000 | 2.717201000  | 0.031863000  |
| H | -3.450421000 | -1.277732000 | -0.219020000 |
| O | -5.995538000 | -1.791460000 | -0.414597000 |
| O | -7.614713000 | 0.368751000  | -0.252492000 |
| H | -8.090315000 | 1.204826000  | -0.227973000 |
| C | -6.665272000 | -2.330136000 | 0.724673000  |
| H | -7.502958000 | -1.696277000 | 1.021430000  |
| H | -7.034168000 | -3.308382000 | 0.425195000  |
| H | -5.962581000 | -2.440077000 | 1.555447000  |
| N | 5.571848000  | -2.165986000 | -0.070768000 |
| O | 5.155657000  | -3.300893000 | -0.082403000 |
| O | 6.737820000  | -1.843003000 | -0.089685000 |
| N | 4.503160000  | 2.635170000  | 0.057114000  |
| O | 5.694989000  | 2.841126000  | 0.041994000  |
| O | 3.643629000  | 3.486085000  | 0.091821000  |
| H | -1.687766000 | 2.063989000  | 0.156843000  |

Zero-point correction=

0.259784 (Hartree/Particle)

|                                            |              |
|--------------------------------------------|--------------|
| Thermal correction to Energy=              | 0.282959     |
| Thermal correction to Enthalpy=            | 0.283903     |
| Thermal correction to Gibbs Free Energy=   | 0.200758     |
| Sum of electronic and zero-point Energies= | -1323.098898 |
| Sum of electronic and thermal Energies=    | -1323.075723 |
| Sum of electronic and thermal Enthalpies=  | -1323.074779 |

Sum of electronic and thermal Free Energies= -1323.157924

### 1-O4'-H Radical

|   |              |              |              |
|---|--------------|--------------|--------------|
| C | 5.050780000  | 0.224300000  | -0.008036000 |
| C | 4.103751000  | 1.199546000  | 0.240865000  |
| C | 2.745420000  | 0.930333000  | 0.321108000  |
| C | 2.309434000  | -0.378037000 | 0.137078000  |
| C | 3.235260000  | -1.394117000 | -0.097601000 |
| C | 4.576743000  | -1.067200000 | -0.173457000 |
| H | 6.105855000  | 0.455216000  | -0.064991000 |
| H | 2.070219000  | 1.743311000  | 0.556313000  |
| H | 2.904327000  | -2.419025000 | -0.210818000 |
| C | 0.862391000  | -0.789406000 | 0.236814000  |
| O | 0.545716000  | -1.898761000 | 0.574038000  |
| N | -0.030818000 | 0.206195000  | -0.098206000 |
| H | 0.301414000  | 1.057616000  | -0.540403000 |
| N | -1.360289000 | -0.024262000 | -0.012095000 |
| C | -2.134503000 | 0.898504000  | -0.442930000 |
| C | -3.580397000 | 0.759031000  | -0.385880000 |
| C | -4.385526000 | 1.825199000  | -0.884810000 |
| C | -5.739681000 | 1.737942000  | -0.850997000 |
| C | -6.422312000 | 0.573531000  | -0.313750000 |
| C | -5.556574000 | -0.508999000 | 0.192261000  |
| C | -4.175220000 | -0.383347000 | 0.141240000  |
| H | -3.901462000 | 2.706842000  | -1.291331000 |
| H | -6.380623000 | 2.528709000  | -1.220904000 |
| H | -3.562376000 | -1.192709000 | 0.519145000  |
| O | -6.016668000 | -1.639498000 | 0.715122000  |
| O | -7.657528000 | 0.504262000  | -0.286392000 |
| C | -7.410162000 | -1.946002000 | 0.840710000  |
| H | -7.892747000 | -1.962004000 | -0.134745000 |
| H | -7.426253000 | -2.933477000 | 1.295610000  |
| H | -7.911300000 | -1.218898000 | 1.476893000  |
| N | 5.561454000  | -2.145358000 | -0.439765000 |
| O | 5.126748000  | -3.261695000 | -0.595360000 |
| O | 6.726982000  | -1.826346000 | -0.483629000 |
| N | 4.560094000  | 2.595918000  | 0.438351000  |
| O | 5.749930000  | 2.799129000  | 0.402863000  |
| O | 3.704963000  | 3.434413000  | 0.617138000  |
| H | -1.737699000 | 1.827252000  | -0.868692000 |

|                                              |                             |
|----------------------------------------------|-----------------------------|
| Zero-point correction=                       | 0.260520 (Hartree/Particle) |
| Thermal correction to Energy=                | 0.283478                    |
| Thermal correction to Enthalpy=              | 0.284422                    |
| Thermal correction to Gibbs Free Energy=     | 0.202544                    |
| Sum of electronic and zero-point Energies=   | -1323.109439                |
| Sum of electronic and thermal Energies=      | -1323.086482                |
| Sum of electronic and thermal Enthalpies=    | -1323.085538                |
| Sum of electronic and thermal Free Energies= | -1323.167415                |

### 1-Cationic Radical

|   |             |              |              |
|---|-------------|--------------|--------------|
| C | 5.070251000 | 0.190135000  | 0.044277000  |
| C | 4.133597000 | 1.184627000  | 0.256947000  |
| C | 2.769835000 | 0.942973000  | 0.275267000  |
| C | 2.319830000 | -0.357635000 | 0.064443000  |
| C | 3.232532000 | -1.394114000 | -0.138484000 |
| C | 4.580631000 | -1.091937000 | -0.150922000 |
| H | 6.132484000 | 0.400004000  | 0.034504000  |

|   |              |              |              |
|---|--------------|--------------|--------------|
| H | 2.110556000  | 1.774921000  | 0.489752000  |
| H | 2.894810000  | -2.413333000 | -0.281940000 |
| C | 0.874610000  | -0.729986000 | 0.093733000  |
| O | 0.463549000  | -1.820727000 | 0.343006000  |
| N | -0.016733000 | 0.334677000  | -0.229881000 |
| H | 0.344513000  | 1.208213000  | -0.610394000 |
| N | -1.305820000 | 0.125670000  | -0.144167000 |
| C | -2.121240000 | 1.069039000  | -0.509262000 |
| C | -3.531526000 | 0.839710000  | -0.408075000 |
| C | -4.419281000 | 1.890467000  | -0.813943000 |
| C | -5.768808000 | 1.716167000  | -0.740452000 |
| C | -6.297564000 | 0.494692000  | -0.268214000 |
| C | -5.415848000 | -0.565145000 | 0.177569000  |
| C | -4.051112000 | -0.363931000 | 0.076988000  |
| H | -4.009856000 | 2.823666000  | -1.182384000 |
| H | -6.453370000 | 2.497238000  | -1.052762000 |
| H | -3.388719000 | -1.160882000 | 0.391207000  |
| O | -5.815536000 | -1.737824000 | 0.626387000  |
| O | -7.594062000 | 0.261639000  | -0.234602000 |
| H | -8.112378000 | 1.007083000  | -0.568687000 |
| C | -7.135650000 | -2.033754000 | 1.122508000  |
| H | -7.836852000 | -2.140994000 | 0.298055000  |
| H | -7.018523000 | -2.977996000 | 1.645362000  |
| H | -7.465793000 | -1.258296000 | 1.812471000  |
| N | 5.554421000  | -2.191725000 | -0.382551000 |
| O | 5.095934000  | -3.293198000 | -0.567273000 |
| O | 6.723357000  | -1.893898000 | -0.368996000 |
| N | 4.601746000  | 2.575596000  | 0.480180000  |
| O | 5.792064000  | 2.756250000  | 0.503670000  |
| O | 3.746093000  | 3.421980000  | 0.617151000  |
| H | -1.764905000 | 2.029205000  | -0.889282000 |

|                                              |                             |
|----------------------------------------------|-----------------------------|
| Zero-point correction=                       | 0.273308 (Hartree/Particle) |
| Thermal correction to Energy=                | 0.296450                    |
| Thermal correction to Enthalpy=              | 0.297394                    |
| Thermal correction to Gibbs Free Energy=     | 0.215456                    |
| Sum of electronic and zero-point Energies=   | -1323.443486                |
| Sum of electronic and thermal Energies=      | -1323.420344                |
| Sum of electronic and thermal Enthalpies=    | -1323.419400                |
| Sum of electronic and thermal Free Energies= | -1323.501338                |

### 1-N8-H Anion

|   |              |              |              |
|---|--------------|--------------|--------------|
| C | 5.038047000  | 0.235474000  | 0.035247000  |
| C | 4.068761000  | 1.226752000  | 0.047669000  |
| C | 2.707704000  | 0.959086000  | 0.015517000  |
| C | 2.279232000  | -0.367817000 | -0.031589000 |
| C | 3.224355000  | -1.390710000 | -0.045480000 |
| C | 4.574413000  | -1.067564000 | -0.011900000 |
| H | 6.092225000  | 0.466638000  | 0.060968000  |
| H | 1.970903000  | 1.750914000  | 0.026170000  |
| H | 2.879623000  | -2.416569000 | -0.082318000 |
| C | 0.802777000  | -0.756788000 | -0.069545000 |
| O | 0.542254000  | -1.961060000 | -0.110121000 |
| N | 0.023338000  | 0.331088000  | -0.048341000 |
| N | -1.297988000 | 0.029430000  | -0.088349000 |
| C | -2.083291000 | 1.039719000  | -0.044506000 |
| C | -3.538125000 | 0.871720000  | -0.076857000 |
| C | -4.377436000 | 1.982218000  | 0.022174000  |
| C | -5.762859000 | 1.838820000  | 0.005251000  |

|   |              |              |              |
|---|--------------|--------------|--------------|
| C | -6.334549000 | 0.581301000  | -0.115656000 |
| C | -5.502298000 | -0.543673000 | -0.219273000 |
| C | -4.128717000 | -0.396094000 | -0.198930000 |
| H | -3.942893000 | 2.971599000  | 0.116536000  |
| H | -6.404947000 | 2.712327000  | 0.081897000  |
| H | -3.493910000 | -1.270917000 | -0.283476000 |
| O | -6.060853000 | -1.788654000 | -0.374146000 |
| O | -7.690991000 | 0.376008000  | -0.142474000 |
| H | -8.129506000 | 1.228644000  | -0.092274000 |
| C | -6.598989000 | -2.314249000 | 0.828486000  |
| H | -7.397264000 | -1.672926000 | 1.212400000  |
| H | -7.004512000 | -3.296131000 | 0.586904000  |
| H | -5.812828000 | -2.419092000 | 1.583320000  |
| N | 5.576842000  | -2.153772000 | -0.025959000 |
| O | 5.173196000  | -3.294487000 | -0.068272000 |
| O | 6.750660000  | -1.840046000 | 0.005977000  |
| N | 4.523911000  | 2.631787000  | 0.098292000  |
| O | 5.721810000  | 2.836784000  | 0.118793000  |
| O | 3.680130000  | 3.500229000  | 0.116623000  |
| H | -1.683416000 | 2.056422000  | 0.025682000  |

|                                              |                             |
|----------------------------------------------|-----------------------------|
| Zero-point correction=                       | 0.259163 (Hartree/Particle) |
| Thermal correction to Energy=                | 0.282296                    |
| Thermal correction to Enthalpy=              | 0.283240                    |
| Thermal correction to Gibbs Free Energy=     | 0.201534                    |
| Sum of electronic and zero-point Energies=   | -1323.229706                |
| Sum of electronic and thermal Energies=      | -1323.206574                |
| Sum of electronic and thermal Enthalpies=    | -1323.205630                |
| Sum of electronic and thermal Free Energies= | -1323.287335                |

### 1-O4'-H Anion

|   |              |              |              |
|---|--------------|--------------|--------------|
| C | 5.034021000  | 0.345381000  | -0.021664000 |
| C | 4.024908000  | 1.251826000  | 0.246724000  |
| C | 2.688123000  | 0.891327000  | 0.346633000  |
| C | 2.330071000  | -0.441560000 | 0.157104000  |
| C | 3.325415000  | -1.388655000 | -0.091508000 |
| C | 4.641627000  | -0.973577000 | -0.185437000 |
| H | 6.069167000  | 0.646590000  | -0.090386000 |
| H | 1.961220000  | 1.653013000  | 0.598088000  |
| H | 3.052876000  | -2.431303000 | -0.196328000 |
| C | 0.915992000  | -0.969407000 | 0.276198000  |
| O | 0.733032000  | -2.127615000 | 0.594722000  |
| N | -0.035718000 | -0.055654000 | -0.010040000 |
| H | 0.240622000  | 0.840801000  | -0.399013000 |
| N | -1.375921000 | -0.349658000 | 0.058545000  |
| C | -2.138180000 | 0.613382000  | -0.353689000 |
| C | -3.559425000 | 0.586301000  | -0.388584000 |
| C | -4.266908000 | 1.719286000  | -0.848414000 |
| C | -5.636362000 | 1.743555000  | -0.899825000 |
| C | -6.446801000 | 0.612891000  | -0.506451000 |
| C | -5.679422000 | -0.536003000 | -0.016191000 |
| C | -4.315933000 | -0.539618000 | 0.031261000  |
| H | -3.701759000 | 2.591816000  | -1.170410000 |
| H | -6.171062000 | 2.613347000  | -1.265137000 |
| H | -3.803419000 | -1.427081000 | 0.387205000  |
| O | -6.353606000 | -1.679369000 | 0.348494000  |
| O | -7.690324000 | 0.603469000  | -0.580055000 |
| C | -7.232160000 | -1.505678000 | 1.447580000  |
| H | -7.993901000 | -0.758514000 | 1.220657000  |
| H | -7.699042000 | -2.475025000 | 1.627302000  |

|   |              |              |              |
|---|--------------|--------------|--------------|
| H | -6.666487000 | -1.207954000 | 2.339295000  |
| N | 5.693343000  | -1.979287000 | -0.465560000 |
| O | 5.343250000  | -3.126772000 | -0.613629000 |
| O | 6.837626000  | -1.583885000 | -0.529413000 |
| N | 4.396028000  | 2.669395000  | 0.453815000  |
| O | 5.569840000  | 2.956624000  | 0.371952000  |
| O | 3.502196000  | 3.451949000  | 0.687936000  |
| H | -1.678247000 | 1.548816000  | -0.711080000 |

|                                              |                             |
|----------------------------------------------|-----------------------------|
| Zero-point correction=                       | 0.259972 (Hartree/Particle) |
| Thermal correction to Energy=                | 0.282829                    |
| Thermal correction to Enthalpy=              | 0.283774                    |
| Thermal correction to Gibbs Free Energy=     | 0.203260                    |
| Sum of electronic and zero-point Energies=   | -1323.222110                |
| Sum of electronic and thermal Energies=      | -1323.199253                |
| Sum of electronic and thermal Enthalpies=    | -1323.198309                |
| Sum of electronic and thermal Free Energies= | -1323.278822                |

### **N'-(4-(Diethylamino)2-hydroxy-benzylidene)-3,5-dinitrobenzohydrazide (2)**

|   |              |              |              |
|---|--------------|--------------|--------------|
| C | -6.098266000 | 0.289894000  | -0.010793000 |
| C | -5.101816000 | 1.196578000  | -0.319031000 |
| C | -3.763106000 | 0.844805000  | -0.415546000 |
| C | -3.398429000 | -0.478144000 | -0.185818000 |
| C | -4.377013000 | -1.426794000 | 0.108608000  |
| C | -5.695495000 | -1.019214000 | 0.198897000  |
| H | -7.136455000 | 0.584383000  | 0.057274000  |
| H | -3.045389000 | 1.604892000  | -0.696977000 |
| H | -4.101475000 | -2.463727000 | 0.254830000  |
| C | -1.978532000 | -0.981830000 | -0.298105000 |
| O | -1.750455000 | -2.125573000 | -0.603987000 |
| N | -1.027938000 | -0.038546000 | -0.019725000 |
| H | -1.298958000 | 0.846734000  | 0.395932000  |
| N | 0.297321000  | -0.352519000 | -0.106003000 |
| C | 1.110075000  | 0.548611000  | 0.290304000  |
| C | 2.550530000  | 0.343836000  | 0.237219000  |
| C | 3.424319000  | 1.333737000  | 0.694668000  |
| C | 4.803686000  | 1.164236000  | 0.654505000  |
| C | 5.369132000  | -0.013035000 | 0.135417000  |
| C | 4.482891000  | -1.018992000 | -0.320491000 |
| C | 3.120408000  | -0.833843000 | -0.264321000 |
| H | 5.425268000  | 1.944989000  | 1.073555000  |
| H | 2.451965000  | -1.606122000 | -0.626842000 |
| N | -6.734810000 | -2.025376000 | 0.528511000  |
| O | -6.363824000 | -3.158481000 | 0.724691000  |
| O | -7.879842000 | -1.638185000 | 0.579668000  |
| N | -5.482850000 | 2.606771000  | -0.567687000 |
| O | -6.657680000 | 2.882568000  | -0.505402000 |
| O | -4.588468000 | 3.385615000  | -0.811946000 |
| H | 0.758099000  | 1.507735000  | 0.682499000  |
| O | 2.870602000  | 2.470883000  | 1.205280000  |
| H | 3.562773000  | 3.089908000  | 1.451332000  |
| H | 4.871669000  | -1.932786000 | -0.747073000 |
| N | 6.735488000  | -0.200638000 | 0.057300000  |
| C | 7.265948000  | -1.563358000 | 0.123343000  |
| C | 7.658645000  | -2.141578000 | -1.234242000 |
| H | 6.523712000  | -2.203388000 | 0.604961000  |
| H | 8.132302000  | -1.555665000 | 0.791199000  |
| H | 8.001412000  | -3.172931000 | -1.122009000 |
| H | 6.809567000  | -2.132211000 | -1.919791000 |
| H | 8.460917000  | -1.560852000 | -1.690839000 |
| C | 7.643018000  | 0.877445000  | 0.426626000  |

|                                              |             |              |                             |
|----------------------------------------------|-------------|--------------|-----------------------------|
| C                                            | 8.992754000 | 0.794081000  | -0.278572000                |
| H                                            | 7.789227000 | 0.907142000  | 1.517778000                 |
| H                                            | 7.179835000 | 1.818954000  | 0.132259000                 |
| H                                            | 9.601649000 | 1.652783000  | 0.010013000                 |
| H                                            | 9.549400000 | -0.106480000 | -0.015731000                |
| H                                            | 8.858849000 | 0.815577000  | -1.361581000                |
| Zero-point correction=                       |             |              | 0.372010 (Hartree/Particle) |
| Thermal correction to Energy=                |             |              | 0.399349                    |
| Thermal correction to Enthalpy=              |             |              | 0.400293                    |
| Thermal correction to Gibbs Free Energy=     |             |              | 0.310044                    |
| Sum of electronic and zero-point Energies=   |             |              | -1421.685489                |
| Sum of electronic and thermal Energies=      |             |              | -1421.658151                |
| Sum of electronic and thermal Enthalpies=    |             |              | -1421.657207                |
| Sum of electronic and thermal Free Energies= |             |              | -1421.747455                |

### 2-N8-H Radical

|   |              |              |              |
|---|--------------|--------------|--------------|
| C | 6.047772000  | 0.237601000  | 0.051316000  |
| C | 5.040829000  | 1.186567000  | 0.048454000  |
| C | 3.693216000  | 0.861444000  | 0.023060000  |
| C | 3.331607000  | -0.484241000 | -0.000368000 |
| C | 4.316039000  | -1.470899000 | 0.002019000  |
| C | 5.645694000  | -1.087682000 | 0.027515000  |
| H | 7.092361000  | 0.515166000  | 0.071148000  |
| H | 2.939510000  | 1.636295000  | 0.021474000  |
| H | 4.036229000  | -2.516648000 | -0.016172000 |
| C | 1.891978000  | -0.928202000 | -0.029724000 |
| O | 1.607141000  | -2.102470000 | -0.047667000 |
| N | 0.997526000  | 0.155769000  | -0.032352000 |
| N | -0.240912000 | -0.235296000 | -0.065372000 |
| C | -1.105055000 | 0.772832000  | -0.064620000 |
| C | -2.495777000 | 0.514039000  | -0.100190000 |
| C | -3.432382000 | 1.576916000  | -0.110333000 |
| C | -4.793971000 | 1.344243000  | -0.139859000 |
| C | -5.305659000 | 0.026265000  | -0.155178000 |
| C | -4.364560000 | -1.046792000 | -0.161233000 |
| C | -3.020679000 | -0.801081000 | -0.132600000 |
| H | -5.453072000 | 2.199390000  | -0.202186000 |
| H | -2.312595000 | -1.620792000 | -0.122157000 |
| N | 6.693742000  | -2.135425000 | 0.029469000  |
| O | 6.326513000  | -3.287357000 | 0.007260000  |
| O | 7.846436000  | -1.766246000 | 0.053170000  |
| N | 5.428151000  | 2.616552000  | 0.073763000  |
| O | 6.611333000  | 2.870855000  | 0.093814000  |
| O | 4.536066000  | 3.433913000  | 0.072711000  |
| H | -0.736520000 | 1.796828000  | -0.035812000 |
| O | -2.926889000 | 2.830831000  | -0.110556000 |
| H | -3.635825000 | 3.479997000  | -0.095807000 |
| H | -4.707551000 | -2.070664000 | -0.157300000 |
| N | -6.645208000 | -0.231617000 | -0.166939000 |
| C | -7.136337000 | -1.539033000 | -0.610477000 |
| C | -7.361380000 | -2.537160000 | 0.523305000  |
| H | -6.434194000 | -1.942678000 | -1.341906000 |
| H | -8.069089000 | -1.368960000 | -1.153177000 |
| H | -7.662160000 | -3.504401000 | 0.114991000  |
| H | -6.450588000 | -2.677906000 | 1.107291000  |
| H | -8.143023000 | -2.194162000 | 1.201403000  |
| C | -7.633161000 | 0.839148000  | -0.052300000 |
| C | -8.885225000 | 0.427950000  | 0.716023000  |
| H | -7.904756000 | 1.205131000  | -1.051990000 |
| H | -7.177322000 | 1.664628000  | 0.489848000  |



|   |              |              |             |
|---|--------------|--------------|-------------|
| H | -9.551956000 | 1.288627000  | 0.790733000 |
| H | -9.437918000 | -0.373480000 | 0.224635000 |
| H | -8.627101000 | 0.106050000  | 1.726290000 |

|                                              |  |  |                             |
|----------------------------------------------|--|--|-----------------------------|
| Zero-point correction=                       |  |  | 0.359048 (Hartree/Particle) |
| Thermal correction to Energy=                |  |  | 0.386223                    |
| Thermal correction to Enthalpy=              |  |  | 0.387167                    |
| Thermal correction to Gibbs Free Energy=     |  |  | 0.295752                    |
| Sum of electronic and zero-point Energies=   |  |  | -1421.054498                |
| Sum of electronic and thermal Energies=      |  |  | -1421.027323                |
| Sum of electronic and thermal Enthalpies=    |  |  | -1421.026378                |
| Sum of electronic and thermal Free Energies= |  |  | -1421.117794                |

### 2-O2'-H Radical

|   |              |              |              |
|---|--------------|--------------|--------------|
| C | 6.083703000  | 0.281378000  | 0.010818000  |
| C | 5.091289000  | 1.200327000  | 0.294670000  |
| C | 3.749541000  | 0.859893000  | 0.385682000  |
| C | 3.379469000  | -0.465313000 | 0.177552000  |
| C | 4.353218000  | -1.426273000 | -0.092116000 |
| C | 5.674728000  | -1.028832000 | -0.178804000 |
| H | 7.124399000  | 0.568320000  | -0.054143000 |
| H | 3.036056000  | 1.631282000  | 0.647191000  |
| H | 4.073720000  | -2.464140000 | -0.223463000 |
| C | 1.958251000  | -0.956307000 | 0.288627000  |
| O | 1.709428000  | -2.088761000 | 0.609622000  |
| N | 1.006566000  | -0.008556000 | -0.016422000 |
| H | 1.281726000  | 0.873140000  | -0.438871000 |
| N | -0.305976000 | -0.313506000 | 0.082625000  |
| C | -1.127994000 | 0.589246000  | -0.323228000 |
| C | -2.547323000 | 0.369242000  | -0.251842000 |
| C | -3.430891000 | 1.443007000  | -0.737914000 |
| C | -4.856284000 | 1.225767000  | -0.661921000 |
| C | -5.385782000 | 0.065286000  | -0.150263000 |
| C | -4.472847000 | -0.958264000 | 0.317263000  |
| C | -3.109375000 | -0.804971000 | 0.258196000  |
| H | -5.465943000 | 2.022047000  | -1.063519000 |
| H | -2.453114000 | -1.586188000 | 0.623122000  |
| N | 6.709783000  | -2.048383000 | -0.480952000 |
| O | 6.331374000  | -3.182195000 | -0.657599000 |
| O | 7.857087000  | -1.669358000 | -0.530634000 |
| N | 5.480114000  | 2.612409000  | 0.523456000  |
| O | 6.656300000  | 2.879551000  | 0.456115000  |
| O | 4.589522000  | 3.397770000  | 0.758190000  |
| H | -0.799205000 | 1.547627000  | -0.733135000 |
| O | -2.945044000 | 2.479169000  | -1.209951000 |
| H | -4.878814000 | -1.860514000 | 0.755445000  |
| N | -6.740650000 | -0.169345000 | -0.012132000 |
| C | -7.245188000 | -1.536353000 | -0.189688000 |
| C | -7.678868000 | -2.208210000 | 1.110007000  |
| H | -6.480256000 | -2.136218000 | -0.686859000 |
| H | -8.085418000 | -1.495982000 | -0.889362000 |
| H | -8.026832000 | -3.224876000 | 0.912808000  |
| H | -6.849664000 | -2.258450000 | 1.818352000  |
| H | -8.487575000 | -1.654519000 | 1.587566000  |
| C | -7.664858000 | 0.911920000  | -0.336448000 |
| C | -9.022926000 | 0.762232000  | 0.338165000  |
| H | -7.789139000 | 0.997361000  | -1.426989000 |
| H | -7.215226000 | 1.841675000  | 0.012758000  |
| H | -9.641680000 | 1.625961000  | 0.089208000  |
| H | -9.559238000 | -0.130452000 | 0.012358000  |

|   |              |             |             |
|---|--------------|-------------|-------------|
| H | -8.909167000 | 0.723525000 | 1.423029000 |
|---|--------------|-------------|-------------|

|                                              |                             |
|----------------------------------------------|-----------------------------|
| Zero-point correction=                       | 0.358789 (Hartree/Particle) |
| Thermal correction to Energy=                | 0.385698                    |
| Thermal correction to Enthalpy=              | 0.386642                    |
| Thermal correction to Gibbs Free Energy=     | 0.296580                    |
| Sum of electronic and zero-point Energies=   | -1421.054080                |
| Sum of electronic and thermal Energies=      | -1421.027171                |
| Sum of electronic and thermal Enthalpies=    | -1421.026227                |
| Sum of electronic and thermal Free Energies= | -1421.116289                |

### 2-C7'-H Radical

|   |              |              |              |
|---|--------------|--------------|--------------|
| C | 6.043610000  | 0.318115000  | -0.000057000 |
| C | 5.037366000  | 1.210464000  | 0.318122000  |
| C | 3.702116000  | 0.843941000  | 0.406920000  |
| C | 3.351316000  | -0.479402000 | 0.158387000  |
| C | 4.340107000  | -1.414049000 | -0.146717000 |
| C | 5.654557000  | -0.992012000 | -0.228406000 |
| H | 7.078934000  | 0.623909000  | -0.061811000 |
| H | 2.976396000  | 1.593078000  | 0.697096000  |
| H | 4.075470000  | -2.451624000 | -0.307749000 |
| C | 1.936755000  | -0.999247000 | 0.260941000  |
| O | 1.719640000  | -2.149700000 | 0.548906000  |
| N | 0.975995000  | -0.062139000 | -0.005115000 |
| H | 1.237613000  | 0.833618000  | -0.403988000 |
| N | -0.344916000 | -0.391424000 | 0.077399000  |
| C | -1.169220000 | 0.509343000  | -0.296937000 |
| C | -2.605977000 | 0.281212000  | -0.252175000 |
| C | -3.496563000 | 1.294878000  | -0.623861000 |
| C | -4.870263000 | 1.101312000  | -0.591900000 |
| C | -5.410768000 | -0.133374000 | -0.192781000 |
| C | -4.515630000 | -1.151640000 | 0.206611000  |
| C | -3.155642000 | -0.936351000 | 0.169481000  |
| H | -5.522793000 | 1.932275000  | -0.827538000 |
| H | -2.474049000 | -1.724382000 | 0.467410000  |
| N | 6.704725000  | -1.983194000 | -0.568990000 |
| O | 6.345609000  | -3.117339000 | -0.780609000 |
| O | 7.845789000  | -1.583708000 | -0.612754000 |
| N | 5.403568000  | 2.620987000  | 0.586762000  |
| O | 6.575678000  | 2.909339000  | 0.531094000  |
| O | 4.500765000  | 3.387330000  | 0.839343000  |
| H | -0.830476000 | 1.483302000  | -0.662886000 |
| O | -2.960610000 | 2.490083000  | -1.001418000 |
| H | -3.661402000 | 3.097812000  | -1.251943000 |
| H | -4.876938000 | -2.113189000 | 0.539350000  |
| N | -6.786223000 | -0.334233000 | -0.199361000 |
| C | -7.345956000 | -1.454111000 | 0.562442000  |
| C | -7.278973000 | -1.226480000 | 2.069252000  |
| H | -6.826856000 | -2.371044000 | 0.278593000  |
| H | -8.377360000 | -1.585443000 | 0.244833000  |
| H | -7.695134000 | -2.084131000 | 2.601338000  |
| H | -6.248496000 | -1.082345000 | 2.398056000  |
| H | -7.850316000 | -0.337145000 | 2.342975000  |
| C | -7.630932000 | 0.571200000  | -0.817814000 |
| C | -9.110344000 | 0.509039000  | -0.660420000 |
| H | -7.209301000 | 1.103322000  | -1.658977000 |
| H | -9.548252000 | 1.412867000  | -1.085321000 |
| H | -9.574092000 | -0.343800000 | -1.177177000 |
| H | -9.413329000 | 0.457881000  | 0.389852000  |

Zero-point correction=  
(Hartree/Particle)

0.357920

|                                              |              |
|----------------------------------------------|--------------|
| Thermal correction to Energy=                | 0.385464     |
| Thermal correction to Enthalpy=              | 0.386409     |
| Thermal correction to Gibbs Free Energy=     | 0.294848     |
| Sum of electronic and zero-point Energies=   | -1421.048951 |
| Sum of electronic and thermal Energies=      | -1421.021406 |
| Sum of electronic and thermal Enthalpies=    | -1421.020462 |
| Sum of electronic and thermal Free Energies= | -1421.112023 |

## 2-Cationic Radical

|   |              |              |              |
|---|--------------|--------------|--------------|
| C | 6.016569000  | 0.289299000  | 0.097406000  |
| C | 5.012346000  | 1.205000000  | 0.350946000  |
| C | 3.668821000  | 0.866677000  | 0.359757000  |
| C | 3.310759000  | -0.452390000 | 0.095526000  |
| C | 4.294187000  | -1.411521000 | -0.149599000 |
| C | 5.617806000  | -1.014712000 | -0.150806000 |
| H | 7.061009000  | 0.574151000  | 0.096438000  |
| H | 2.951378000  | 1.639013000  | 0.607735000  |
| H | 4.027811000  | -2.445171000 | -0.333404000 |
| C | 1.893266000  | -0.928974000 | 0.109826000  |
| O | 1.573163000  | -2.059026000 | 0.327192000  |
| N | 0.934766000  | 0.070606000  | -0.179712000 |
| H | 1.231403000  | 0.980354000  | -0.527485000 |
| N | -0.344031000 | -0.234484000 | -0.115136000 |
| C | -1.208840000 | 0.675105000  | -0.461821000 |
| C | -2.593629000 | 0.353822000  | -0.388094000 |
| C | -3.576936000 | 1.331769000  | -0.749721000 |
| C | -4.914902000 | 1.046577000  | -0.698562000 |
| C | -5.366557000 | -0.240858000 | -0.275492000 |
| C | -4.374589000 | -1.217449000 | 0.101641000  |
| C | -3.049935000 | -0.921874000 | 0.037216000  |
| H | -5.621531000 | 1.825567000  | -0.949383000 |
| H | -2.306833000 | -1.663147000 | 0.303910000  |
| N | 6.665970000  | -2.031925000 | -0.427347000 |
| O | 6.287380000  | -3.155567000 | -0.655857000 |
| O | 7.811532000  | -1.653260000 | -0.403666000 |
| N | 5.382968000  | 2.614064000  | 0.633400000  |
| O | 6.558238000  | 2.877446000  | 0.661482000  |
| O | 4.471846000  | 3.392377000  | 0.809922000  |
| H | -0.908652000 | 1.665797000  | -0.804202000 |
| O | -3.088212000 | 2.524675000  | -1.122778000 |
| H | -3.786779000 | 3.141758000  | -1.365972000 |
| H | -4.677528000 | -2.204302000 | 0.416877000  |
| N | -6.668047000 | -0.544643000 | -0.234532000 |
| C | -7.154968000 | -1.787237000 | 0.399257000  |
| C | -7.017053000 | -1.771849000 | 1.920084000  |
| H | -6.634510000 | -2.637520000 | -0.044237000 |
| H | -8.203014000 | -1.882967000 | 0.120724000  |
| H | -7.404119000 | -2.708329000 | 2.323898000  |
| H | -5.977850000 | -1.667852000 | 2.233702000  |
| H | -7.588411000 | -0.951698000 | 2.355160000  |
| C | -7.699697000 | 0.389083000  | -0.714834000 |
| C | -8.199921000 | 1.323606000  | 0.383614000  |
| H | -8.517010000 | -0.220017000 | -1.100503000 |
| H | -7.300523000 | 0.940377000  | -1.564381000 |
| H | -8.918501000 | 2.028262000  | -0.036906000 |
| H | -8.702111000 | 0.765454000  | 1.174533000  |
| H | -7.377549000 | 1.887357000  | 0.828371000  |

|                                              |                             |
|----------------------------------------------|-----------------------------|
| Zero-point correction=                       | 0.372544 (Hartree/Particle) |
| Thermal correction to Energy=                | 0.399725                    |
| Thermal correction to Enthalpy=              | 0.400669                    |
| Thermal correction to Gibbs Free Energy=     | 0.310059                    |
| Sum of electronic and zero-point Energies=   | -1421.428459                |
| Sum of electronic and thermal Energies=      | -1421.401278                |
| Sum of electronic and thermal Enthalpies=    | -1421.400334                |
| Sum of electronic and thermal Free Energies= | -1421.490944                |

### 2-N8-H Anion

|   |              |              |              |
|---|--------------|--------------|--------------|
| C | 6.086055000  | 0.234328000  | 0.013352000  |
| C | 5.077813000  | 1.186231000  | -0.005579000 |
| C | 3.728141000  | 0.864131000  | -0.006479000 |
| C | 3.352245000  | -0.479690000 | 0.012458000  |
| C | 4.337726000  | -1.463790000 | 0.031855000  |
| C | 5.674328000  | -1.086670000 | 0.031734000  |
| H | 7.130193000  | 0.508175000  | 0.013684000  |
| H | 2.959636000  | 1.625375000  | -0.021578000 |
| H | 4.033267000  | -2.502798000 | 0.046713000  |
| C | 1.892382000  | -0.928452000 | 0.013826000  |
| O | 1.682212000  | -2.144952000 | 0.032898000  |
| N | 1.071777000  | 0.126174000  | -0.006644000 |
| N | -0.238925000 | -0.229157000 | -0.003489000 |
| C | -1.061810000 | 0.753672000  | -0.025878000 |
| C | -2.505458000 | 0.500860000  | -0.020503000 |
| C | -3.431481000 | 1.545448000  | -0.064102000 |
| C | -4.808088000 | 1.314662000  | -0.062930000 |
| C | -5.314841000 | 0.013239000  | 0.002946000  |
| C | -4.391344000 | -1.044909000 | 0.049939000  |
| C | -3.031499000 | -0.797130000 | 0.031629000  |
| H | -5.470416000 | 2.169052000  | -0.146523000 |
| H | -2.319297000 | -1.613318000 | 0.074433000  |
| N | 6.719042000  | -2.131753000 | 0.052192000  |
| O | 6.361385000  | -3.288585000 | 0.067067000  |
| O | 7.880074000  | -1.771456000 | 0.052899000  |
| N | 5.477834000  | 2.608541000  | -0.025595000 |
| O | 6.667269000  | 2.860680000  | -0.025367000 |
| O | 4.601316000  | 3.443780000  | -0.041165000 |
| H | -0.707985000 | 1.785024000  | -0.048163000 |
| O | -2.946953000 | 2.825868000  | -0.129065000 |
| H | -3.683146000 | 3.441043000  | -0.109067000 |
| H | -4.747082000 | -2.065206000 | 0.127233000  |
| N | -6.696875000 | -0.263599000 | 0.033780000  |
| C | -7.160744000 | -1.377136000 | -0.796601000 |
| C | -7.656615000 | -2.574993000 | 0.010804000  |
| H | -6.343195000 | -1.689376000 | -1.449592000 |
| H | -7.958895000 | -1.016812000 | -1.458276000 |
| H | -7.971422000 | -3.383017000 | -0.655463000 |
| H | -6.861844000 | -2.949272000 | 0.658417000  |
| H | -8.501001000 | -2.300960000 | 0.645408000  |
| C | -7.612201000 | 0.857863000  | 0.139224000  |
| C | -8.994027000 | 0.449266000  | 0.639285000  |
| H | -7.710344000 | 1.390398000  | -0.823821000 |
| H | -7.189640000 | 1.562718000  | 0.856968000  |
| H | -9.619472000 | 1.337199000  | 0.755724000  |
| H | -9.502119000 | -0.224662000 | -0.053195000 |
| H | -8.913135000 | -0.049260000 | 1.607384000  |

|                               |                             |
|-------------------------------|-----------------------------|
| Zero-point correction=        | 0.357413 (Hartree/Particle) |
| Thermal correction to Energy= | 0.384581                    |

|                                              |              |
|----------------------------------------------|--------------|
| Thermal correction to Enthalpy=              | 0.385525     |
| Thermal correction to Gibbs Free Energy=     | 0.294921     |
| Sum of electronic and zero-point Energies=   | -1421.171689 |
| Sum of electronic and thermal Energies=      | -1421.144521 |
| Sum of electronic and thermal Enthalpies=    | -1421.143577 |
| Sum of electronic and thermal Free Energies= | -1421.234180 |

### 2-O2'-H Anion

|   |              |              |              |
|---|--------------|--------------|--------------|
| C | 6.054018000  | 0.397030000  | -0.082630000 |
| C | 5.017146000  | 1.255598000  | 0.232605000  |
| C | 3.704963000  | 0.833016000  | 0.398505000  |
| C | 3.404125000  | -0.517375000 | 0.234362000  |
| C | 4.430412000  | -1.417189000 | -0.058277000 |
| C | 5.718713000  | -0.940295000 | -0.221470000 |
| H | 7.068344000  | 0.747976000  | -0.204314000 |
| H | 2.953216000  | 1.560320000  | 0.678447000  |
| H | 4.203581000  | -2.472485000 | -0.142136000 |
| C | 2.025163000  | -1.113712000 | 0.429614000  |
| O | 1.922323000  | -2.273438000 | 0.783102000  |
| N | 1.016753000  | -0.260211000 | 0.166909000  |
| H | 1.221463000  | 0.641569000  | -0.253594000 |
| N | -0.304997000 | -0.622840000 | 0.301373000  |
| C | -1.125057000 | 0.286239000  | -0.121076000 |
| C | -2.545691000 | 0.188424000  | -0.093862000 |
| C | -3.298663000 | 1.313607000  | -0.626091000 |
| C | -4.740053000 | 1.166281000  | -0.583513000 |
| C | -5.363938000 | 0.052077000  | -0.067641000 |
| C | -4.581313000 | -1.026650000 | 0.450555000  |
| C | -3.212921000 | -0.936819000 | 0.423268000  |
| H | -5.294779000 | 1.987473000  | -1.018132000 |
| H | -2.607741000 | -1.744588000 | 0.823694000  |
| N | 6.802375000  | -1.896086000 | -0.547731000 |
| O | 6.502024000  | -3.060751000 | -0.671912000 |
| O | 7.922127000  | -1.447464000 | -0.670986000 |
| N | 5.333546000  | 2.689196000  | 0.421834000  |
| O | 6.481544000  | 3.034880000  | 0.244952000  |
| O | 4.426091000  | 3.423934000  | 0.739223000  |
| H | -0.751431000 | 1.228902000  | -0.543427000 |
| O | -2.757908000 | 2.334553000  | -1.106617000 |
| H | -5.067907000 | -1.884907000 | 0.896236000  |
| N | -6.772645000 | -0.073225000 | 0.001054000  |
| C | -7.330277000 | -1.361299000 | -0.413837000 |
| C | -7.999288000 | -2.131797000 | 0.723757000  |
| H | -6.530208000 | -1.968177000 | -0.841932000 |
| H | -8.052563000 | -1.192671000 | -1.223997000 |
| H | -8.385785000 | -3.090717000 | 0.365322000  |
| H | -7.278730000 | -2.322910000 | 1.521044000  |
| H | -8.826342000 | -1.563599000 | 1.153011000  |
| C | -7.564388000 | 1.084141000  | -0.374613000 |
| C | -8.995047000 | 1.018722000  | 0.151326000  |
| H | -7.578159000 | 1.222704000  | -1.470041000 |
| H | -7.080850000 | 1.963442000  | 0.051743000  |
| H | -9.521757000 | 1.941726000  | -0.102786000 |
| H | -9.558381000 | 0.187730000  | -0.279108000 |
| H | -8.994229000 | 0.906660000  | 1.237902000  |

|                                          |                             |
|------------------------------------------|-----------------------------|
| Zero-point correction=                   | 0.358367 (Hartree/Particle) |
| Thermal correction to Energy=            | 0.385145                    |
| Thermal correction to Enthalpy=          | 0.386089                    |
| Thermal correction to Gibbs Free Energy= | 0.296837                    |

|                                              |              |
|----------------------------------------------|--------------|
| Sum of electronic and zero-point Energies=   | -1421.166904 |
| Sum of electronic and thermal Energies=      | -1421.140126 |
| Sum of electronic and thermal Enthalpies=    | -1421.139182 |
| Sum of electronic and thermal Free Energies= | -1421.228434 |

### 2-C7'-H Anion

|   |              |              |              |
|---|--------------|--------------|--------------|
| C | 6.042610000  | 0.392397000  | -0.022580000 |
| C | 4.980251000  | 1.256927000  | 0.223765000  |
| C | 3.662333000  | 0.821356000  | 0.298019000  |
| C | 3.371355000  | -0.525899000 | 0.103863000  |
| C | 4.419739000  | -1.426968000 | -0.126674000 |
| C | 5.716035000  | -0.941030000 | -0.191302000 |
| H | 7.061958000  | 0.744622000  | -0.069894000 |
| H | 2.901964000  | 1.554158000  | 0.534667000  |
| H | 4.202097000  | -2.480230000 | -0.239932000 |
| C | 1.988296000  | -1.117652000 | 0.194519000  |
| O | 1.845298000  | -2.312334000 | 0.374625000  |
| N | 0.981381000  | -0.221755000 | 0.044021000  |
| H | 1.199319000  | 0.731205000  | -0.227518000 |
| N | -0.330860000 | -0.592331000 | 0.100316000  |
| C | -1.163212000 | 0.376578000  | -0.133163000 |
| C | -2.576023000 | 0.210322000  | -0.126668000 |
| C | -3.440076000 | 1.304458000  | -0.358043000 |
| C | -4.808517000 | 1.178828000  | -0.377225000 |
| C | -5.434791000 | -0.091775000 | -0.172749000 |
| C | -4.563325000 | -1.190018000 | 0.130620000  |
| C | -3.205587000 | -1.035864000 | 0.137672000  |
| H | -5.409253000 | 2.070427000  | -0.491566000 |
| H | -2.565650000 | -1.883058000 | 0.355068000  |
| N | 6.821812000  | -1.894158000 | -0.444548000 |
| O | 6.534990000  | -3.061868000 | -0.581919000 |
| O | 7.948009000  | -1.446322000 | -0.501145000 |
| N | 5.264947000  | 2.675336000  | 0.431176000  |
| O | 6.427862000  | 3.032909000  | 0.363437000  |
| O | 4.325529000  | 3.419575000  | 0.654351000  |
| H | -0.791370000 | 1.384805000  | -0.348721000 |
| O | -2.849125000 | 2.528585000  | -0.549409000 |
| H | -3.540289000 | 3.170683000  | -0.729575000 |
| H | -4.959560000 | -2.168109000 | 0.362719000  |
| N | -6.783260000 | -0.205066000 | -0.236677000 |
| C | -7.393926000 | -1.464746000 | 0.190072000  |
| C | -7.545433000 | -1.526442000 | 1.707993000  |
| H | -6.798259000 | -2.295247000 | -0.183885000 |
| H | -8.366435000 | -1.548018000 | -0.288653000 |
| H | -8.028514000 | -2.458637000 | 2.011685000  |
| H | -6.568588000 | -1.462035000 | 2.191487000  |
| H | -8.149411000 | -0.682555000 | 2.047407000  |
| C | -7.648888000 | 0.883954000  | -0.435615000 |
| C | -9.080816000 | 0.613493000  | -0.801434000 |
| H | -7.192925000 | 1.683759000  | -1.002034000 |
| H | -9.550107000 | 1.573598000  | -1.026577000 |
| H | -9.233376000 | -0.030094000 | -1.691515000 |
| H | -9.670401000 | 0.168649000  | 0.010866000  |

|                                            |                             |
|--------------------------------------------|-----------------------------|
| Zero-point correction=                     | 0.355073 (Hartree/Particle) |
| Thermal correction to Energy=              | 0.382798                    |
| Thermal correction to Enthalpy=            | 0.383743                    |
| Thermal correction to Gibbs Free Energy=   | 0.292059                    |
| Sum of electronic and zero-point Energies= | -1421.089910                |
| Sum of electronic and thermal Energies=    | -1421.062184                |

Sum of electronic and thermal Enthalpies= -1421.061240  
 Sum of electronic and thermal Free Energies= -1421.152923

### N'-benzylidene-3,5-dinitrobenzohydrazide (3)

|   |              |              |              |
|---|--------------|--------------|--------------|
| C | -3.012016000 | 1.308332000  | 0.120306000  |
| C | -1.682578000 | 0.942958000  | 0.274067000  |
| C | -1.345460000 | -0.405110000 | 0.204807000  |
| C | -2.340677000 | -1.362037000 | 0.009403000  |
| C | -3.648720000 | -0.940539000 | -0.144315000 |
| C | -4.024551000 | 0.392179000  | -0.092820000 |
| H | -0.952172000 | 1.716444000  | 0.474748000  |
| H | -2.087416000 | -2.414652000 | -0.013551000 |
| H | -5.055456000 | 0.698057000  | -0.207860000 |
| N | -3.363491000 | 2.746101000  | 0.196838000  |
| O | -4.531707000 | 3.036336000  | 0.097027000  |
| O | -2.452339000 | 3.528867000  | 0.349768000  |
| N | -4.706306000 | -1.957154000 | -0.368740000 |
| O | -5.841550000 | -1.554816000 | -0.478274000 |
| O | -4.356697000 | -3.112099000 | -0.428090000 |
| C | 0.060978000  | -0.919037000 | 0.392468000  |
| O | 0.269647000  | -2.021093000 | 0.828205000  |
| N | 1.038503000  | -0.028700000 | 0.018651000  |
| H | 0.792198000  | 0.804566000  | -0.505899000 |
| N | 2.348577000  | -0.361171000 | 0.163523000  |
| C | 3.202395000  | 0.453246000  | -0.313132000 |
| H | 2.894772000  | 1.375022000  | -0.822595000 |
| C | 5.136109000  | -0.944928000 | 0.425160000  |
| C | 4.643604000  | 0.203170000  | -0.205470000 |
| C | 5.535346000  | 1.131500000  | -0.744274000 |
| C | 6.907029000  | 0.919882000  | -0.657006000 |
| C | 7.392032000  | -0.221827000 | -0.030447000 |
| C | 6.503619000  | -1.152254000 | 0.509389000  |
| H | 4.434583000  | -1.658962000 | 0.839477000  |
| H | 5.153998000  | 2.022241000  | -1.233012000 |
| H | 7.593720000  | 1.644455000  | -1.077353000 |
| H | 8.460140000  | -0.389561000 | 0.038895000  |
| H | 6.883174000  | -2.041905000 | 0.997330000  |

Zero-point correction= 0.236491 (Hartree/Particle)  
 Thermal correction to Energy= 0.255816  
 Thermal correction to Enthalpy= 0.256760  
 Thermal correction to Gibbs Free Energy= 0.184402  
 Sum of electronic and zero-point Energies= -1134.040564  
 Sum of electronic and thermal Energies= -1134.021239  
 Sum of electronic and thermal Enthalpies= -1134.020295  
 Sum of electronic and thermal Free Energies= -1134.092653

### 3-N8-H Radical

|   |             |              |              |
|---|-------------|--------------|--------------|
| C | 2.932375000 | 1.318751000  | -0.000023000 |
| C | 1.603139000 | 0.925057000  | 0.000082000  |
| C | 1.312449000 | -0.437679000 | 0.000123000  |
| C | 2.345537000 | -1.374184000 | 0.000072000  |
| C | 3.652912000 | -0.922777000 | -0.000035000 |
| C | 3.985805000 | 0.422182000  | -0.000081000 |
| H | 0.814097000 | 1.663710000  | 0.000139000  |
| H | 2.122336000 | -2.433756000 | 0.000124000  |
| H | 5.015304000 | 0.752994000  | -0.000161000 |
| N | 3.244390000 | 2.767920000  | -0.000074000 |
| O | 4.412107000 | 3.082631000  | -0.000076000 |
| O | 2.309109000 | 3.535398000  | -0.000119000 |

|   |              |              |              |
|---|--------------|--------------|--------------|
| N | 4.753660000  | -1.916292000 | -0.000072000 |
| O | 5.884772000  | -1.487085000 | -0.000412000 |
| O | 4.443446000  | -3.084639000 | 0.000240000  |
| C | -0.098136000 | -0.954848000 | 0.000204000  |
| O | -0.338299000 | -2.134654000 | 0.000223000  |
| N | -1.062513000 | 0.088005000  | 0.000277000  |
| N | -2.273752000 | -0.379410000 | 0.000101000  |
| C | -3.192096000 | 0.573872000  | 0.000242000  |
| H | -2.876489000 | 1.618576000  | 0.000490000  |
| C | -5.029549000 | -1.089166000 | -0.000241000 |
| C | -4.589971000 | 0.249436000  | 0.000068000  |
| C | -5.534546000 | 1.290653000  | 0.000203000  |
| C | -6.889355000 | 1.003052000  | 0.000034000  |
| C | -7.314330000 | -0.324406000 | -0.000275000 |
| C | -6.384125000 | -1.366214000 | -0.000411000 |
| H | -4.290714000 | -1.880937000 | -0.000336000 |
| H | -5.192149000 | 2.319820000  | 0.000437000  |
| H | -7.615481000 | 1.806320000  | 0.000138000  |
| H | -8.374214000 | -0.549706000 | -0.000408000 |
| H | -6.724912000 | -2.394169000 | -0.000653000 |

|                                              |                             |
|----------------------------------------------|-----------------------------|
| Zero-point correction=                       | 0.222475 (Hartree/Particle) |
| Thermal correction to Energy=                | 0.241786                    |
| Thermal correction to Enthalpy=              | 0.242730                    |
| Thermal correction to Gibbs Free Energy=     | 0.168503                    |
| Sum of electronic and zero-point Energies=   | -1133.402243                |
| Sum of electronic and thermal Energies=      | -1133.382932                |
| Sum of electronic and thermal Enthalpies=    | -1133.381988                |
| Sum of electronic and thermal Free Energies= | -1133.456215                |

### 3-Cationic Radical

|   |              |              |              |
|---|--------------|--------------|--------------|
| C | 2.980946000  | 1.308264000  | -0.117881000 |
| C | 1.651302000  | 0.930611000  | -0.193430000 |
| C | 1.338884000  | -0.424713000 | -0.112182000 |
| C | 2.351572000  | -1.377787000 | 0.021976000  |
| C | 3.658989000  | -0.939561000 | 0.096493000  |
| C | 4.012908000  | 0.399383000  | 0.028858000  |
| H | 0.915442000  | 1.709901000  | -0.350651000 |
| H | 2.123251000  | -2.435976000 | 0.068124000  |
| H | 5.047309000  | 0.716251000  | 0.085386000  |
| N | 3.302188000  | 2.756103000  | -0.203061000 |
| O | 4.466248000  | 3.059390000  | -0.179907000 |
| O | 2.361913000  | 3.514973000  | -0.284885000 |
| N | 4.739839000  | -1.950296000 | 0.254381000  |
| O | 5.869497000  | -1.531646000 | 0.296947000  |
| O | 4.394106000  | -3.104186000 | 0.328335000  |
| C | -0.051318000 | -0.937273000 | -0.213191000 |
| O | -0.371774000 | -2.033710000 | -0.535349000 |
| N | -1.078178000 | 0.024930000  | 0.157460000  |
| H | -0.819868000 | 0.899901000  | 0.619814000  |
| N | -2.317032000 | -0.295553000 | -0.018718000 |
| C | -3.243438000 | 0.556333000  | 0.388472000  |
| H | -2.968977000 | 1.500474000  | 0.866099000  |
| C | -5.002705000 | -0.986425000 | -0.411799000 |
| C | -4.606125000 | 0.240206000  | 0.202763000  |
| C | -5.592898000 | 1.168201000  | 0.640523000  |
| C | -6.924159000 | 0.880930000  | 0.469167000  |
| C | -7.298190000 | -0.331055000 | -0.137853000 |
| C | -6.337872000 | -1.258711000 | -0.574856000 |
| H | -4.239614000 | -1.682503000 | -0.737127000 |



|   |              |              |              |
|---|--------------|--------------|--------------|
| H | -5.282389000 | 2.096822000  | 1.106324000  |
| H | -7.684594000 | 1.577901000  | 0.796647000  |
| H | -8.350710000 | -0.553893000 | -0.270615000 |
| H | -6.654864000 | -2.184163000 | -1.037923000 |

|                                              |                             |
|----------------------------------------------|-----------------------------|
| Zero-point correction=                       | 0.235899 (Hartree/Particle) |
| Thermal correction to Energy=                | 0.255282                    |
| Thermal correction to Enthalpy=              | 0.256226                    |
| Thermal correction to Gibbs Free Energy=     | 0.183437                    |
| Sum of electronic and zero-point Energies=   | -1133.731032                |
| Sum of electronic and thermal Energies=      | -1133.711649                |
| Sum of electronic and thermal Enthalpies=    | -1133.710705                |
| Sum of electronic and thermal Free Energies= | -1133.783494                |

### 3-N8-H Anion

|   |              |              |              |
|---|--------------|--------------|--------------|
| C | 2.941599000  | 1.319729000  | 0.000040000  |
| C | 1.609712000  | 0.930577000  | -0.000016000 |
| C | 1.302048000  | -0.430243000 | -0.000039000 |
| C | 2.335178000  | -1.364266000 | -0.000017000 |
| C | 3.650913000  | -0.921024000 | -0.000016000 |
| C | 3.995836000  | 0.419247000  | 0.000030000  |
| H | 0.805228000  | 1.653635000  | -0.000048000 |
| H | 2.083655000  | -2.417490000 | 0.000000000  |
| H | 5.025132000  | 0.744771000  | 0.000054000  |
| N | 3.269207000  | 2.760903000  | 0.000138000  |
| O | 4.444007000  | 3.072559000  | 0.000555000  |
| O | 2.351020000  | 3.550292000  | -0.000231000 |
| N | 4.746688000  | -1.913127000 | -0.000058000 |
| O | 5.887784000  | -1.494850000 | -0.000976000 |
| O | 4.446634000  | -3.086129000 | 0.000823000  |
| C | -0.132899000 | -0.952629000 | -0.000033000 |
| O | -0.282982000 | -2.175895000 | 0.000002000  |
| N | -1.010271000 | 0.059637000  | -0.000073000 |
| N | -2.295413000 | -0.365890000 | -0.000007000 |
| C | -3.175920000 | 0.565237000  | -0.000189000 |
| H | -2.875970000 | 1.618005000  | -0.000408000 |
| C | -5.068847000 | -1.074473000 | -0.000027000 |
| C | -4.606384000 | 0.251301000  | -0.000085000 |
| C | -5.550532000 | 1.284464000  | -0.000057000 |
| C | -6.914616000 | 1.009741000  | 0.000039000  |
| C | -7.362027000 | -0.306916000 | 0.000105000  |
| C | -6.428008000 | -1.345283000 | 0.000072000  |
| H | -4.332435000 | -1.869518000 | -0.000055000 |
| H | -5.204506000 | 2.313420000  | -0.000106000 |
| H | -7.628568000 | 1.826299000  | 0.000062000  |
| H | -8.423903000 | -0.525085000 | 0.000181000  |
| H | -6.768149000 | -2.375302000 | 0.000112000  |

|                                              |              |
|----------------------------------------------|--------------|
| Zero-point correction=                       | 0.222308     |
| (Hartree/Particle)                           |              |
| Thermal correction to Energy=                | 0.241406     |
| Thermal correction to Enthalpy=              | 0.242350     |
| Thermal correction to Gibbs Free Energy=     | 0.169892     |
| Sum of electronic and zero-point Energies=   | -1133.536853 |
| Sum of electronic and thermal Energies=      | -1133.517755 |
| Sum of electronic and thermal Enthalpies=    | -1133.516810 |
| Sum of electronic and thermal Free Energies= | -1133.589269 |

### N'-((2-Hydroxynaphthalen-1-yl)methylene)-3,5-dinitrobenzohydrazide (4)

|   |              |              |              |
|---|--------------|--------------|--------------|
| C | -5.075169000 | 0.630657000  | 0.112773000  |
| C | -4.002555000 | 1.421352000  | -0.253976000 |
| C | -2.716967000 | 0.924846000  | -0.410306000 |
| C | -2.488473000 | -0.427969000 | -0.179301000 |
| C | -3.547456000 | -1.263016000 | 0.175079000  |
| C | -4.807779000 | -0.712839000 | 0.321035000  |
| H | -6.070920000 | 1.037187000  | 0.226243000  |
| H | -1.937065000 | 1.600683000  | -0.737465000 |
| H | -3.380361000 | -2.322375000 | 0.325454000  |
| C | -1.139856000 | -1.077284000 | -0.346485000 |
| O | -1.030206000 | -2.245375000 | -0.621547000 |
| N | -0.073431000 | -0.233673000 | -0.157220000 |
| H | -0.202556000 | 0.680923000  | 0.261564000  |
| N | 1.185386000  | -0.729603000 | -0.294518000 |
| C | 2.171296000  | 0.030487000  | 0.010651000  |
| C | 3.544218000  | -0.430151000 | -0.084870000 |
| C | 4.639525000  | 0.465848000  | 0.195152000  |
| C | 5.969268000  | -0.031012000 | 0.146662000  |
| C | 6.189314000  | -1.396568000 | -0.189298000 |
| C | 5.153891000  | -2.231210000 | -0.468665000 |
| C | 3.816010000  | -1.758652000 | -0.422689000 |
| H | 1.981674000  | 1.044452000  | 0.367799000  |
| C | 5.545639000  | 2.650001000  | 0.776066000  |
| C | 4.469289000  | 1.838446000  | 0.512016000  |
| C | 7.059505000  | 0.826012000  | 0.423932000  |
| C | 6.859736000  | 2.145125000  | 0.737296000  |
| H | 5.378960000  | 3.694224000  | 1.012768000  |
| H | 3.483423000  | 2.282153000  | 0.541786000  |
| H | 8.062249000  | 0.414526000  | 0.380804000  |
| H | 7.699043000  | 2.796011000  | 0.947754000  |
| H | 5.304018000  | -3.271056000 | -0.729893000 |
| H | 7.209390000  | -1.763751000 | -0.223071000 |
| O | 2.883887000  | -2.667375000 | -0.709769000 |
| H | 1.990700000  | -2.267881000 | -0.667282000 |
| N | -5.933110000 | -1.597606000 | 0.713216000  |
| O | -7.023220000 | -1.085300000 | 0.820517000  |
| O | -5.677758000 | -2.763635000 | 0.898941000  |
| N | -4.237888000 | 2.863687000  | -0.501261000 |
| O | -3.272865000 | 3.538662000  | -0.783199000 |
| O | -5.372572000 | 3.264376000  | -0.399743000 |

Zero-point correction=  
(Hartree/Particle)

0.288306

|                                              |              |
|----------------------------------------------|--------------|
| Thermal correction to Energy=                | 0.311238     |
| Thermal correction to Enthalpy=              | 0.312183     |
| Thermal correction to Gibbs Free Energy=     | 0.231720     |
| Sum of electronic and zero-point Energies=   | -1362.838282 |
| Sum of electronic and thermal Energies=      | -1362.815350 |
| Sum of electronic and thermal Enthalpies=    | -1362.814406 |
| Sum of electronic and thermal Free Energies= | -1362.894868 |

#### 4-N8-H Radical

|   |              |              |              |
|---|--------------|--------------|--------------|
| C | -5.047227000 | 0.657905000  | -0.000087000 |
| C | -3.924129000 | 1.465955000  | -0.000083000 |
| C | -2.631694000 | 0.965363000  | 0.000032000  |
| C | -2.452934000 | -0.416543000 | 0.000171000  |
| C | -3.558225000 | -1.266236000 | 0.000137000  |
| C | -4.824817000 | -0.709453000 | 0.000014000  |
| H | -6.046339000 | 1.071414000  | -0.000135000 |
| H | -1.784310000 | 1.636453000  | 0.000004000  |

|                                              |              |              |                             |
|----------------------------------------------|--------------|--------------|-----------------------------|
| H                                            | -3.421133000 | -2.340324000 | 0.000200000                 |
| C                                            | -1.088378000 | -1.040981000 | 0.000297000                 |
| O                                            | -0.940801000 | -2.240727000 | 0.000274000                 |
| N                                            | -0.048159000 | -0.090076000 | 0.000484000                 |
| N                                            | 1.109830000  | -0.671535000 | 0.000153000                 |
| C                                            | 2.165431000  | 0.137416000  | 0.000314000                 |
| C                                            | 3.467932000  | -0.399039000 | 0.000065000                 |
| C                                            | 4.639862000  | 0.464522000  | 0.000067000                 |
| C                                            | 5.929072000  | -0.120204000 | -0.000135000                |
| C                                            | 6.053929000  | -1.545923000 | -0.000377000                |
| C                                            | 4.968946000  | -2.362093000 | -0.000389000                |
| C                                            | 3.658673000  | -1.814522000 | -0.000161000                |
| H                                            | 1.980371000  | 1.208263000  | 0.000633000                 |
| C                                            | 5.693817000  | 2.652055000  | 0.000282000                 |
| C                                            | 4.556691000  | 1.872372000  | 0.000259000                 |
| C                                            | 7.078197000  | 0.694793000  | -0.000119000                |
| C                                            | 6.968274000  | 2.065652000  | 0.000097000                 |
| H                                            | 5.597948000  | 3.731124000  | 0.000439000                 |
| H                                            | 3.596342000  | 2.369282000  | 0.000374000                 |
| H                                            | 8.052975000  | 0.219425000  | -0.000284000                |
| H                                            | 7.854048000  | 2.688294000  | 0.000112000                 |
| H                                            | 5.055158000  | -3.440925000 | -0.000564000                |
| H                                            | 7.051400000  | -1.972546000 | -0.000553000                |
| O                                            | 2.673549000  | -2.680286000 | -0.000155000                |
| H                                            | 1.797194000  | -2.195086000 | -0.000091000                |
| N                                            | -6.002958000 | -1.609773000 | -0.000033000                |
| O                                            | -7.095448000 | -1.089818000 | 0.000099000                 |
| O                                            | -5.789404000 | -2.799620000 | -0.000242000                |
| N                                            | -4.117304000 | 2.935525000  | -0.000208000                |
| O                                            | -3.122849000 | 3.624746000  | -0.001035000                |
| O                                            | -5.255550000 | 3.344381000  | 0.000405000                 |
| Zero-point correction=                       |              |              | 0.274983 (Hartree/Particle) |
| Thermal correction to Energy=                |              |              | 0.297563                    |
| Thermal correction to Enthalpy=              |              |              | 0.298507                    |
| Thermal correction to Gibbs Free Energy=     |              |              | 0.218064                    |
| Sum of electronic and zero-point Energies=   |              |              | -1362.209373                |
| Sum of electronic and thermal Energies=      |              |              | -1362.186793                |
| Sum of electronic and thermal Enthalpies=    |              |              | -1362.185849                |
| Sum of electronic and thermal Free Energies= |              |              | -1362.266292                |

#### 4-O2'-H Radical

|   |              |              |              |
|---|--------------|--------------|--------------|
| C | -5.013703000 | 0.662829000  | 0.129387000  |
| C | -3.889506000 | 1.456026000  | 0.000474000  |
| C | -2.618168000 | 0.937314000  | -0.196979000 |
| C | -2.459547000 | -0.443124000 | -0.263129000 |
| C | -3.571998000 | -1.277423000 | -0.156794000 |
| C | -4.814764000 | -0.706100000 | 0.046623000  |
| H | -5.996897000 | 1.086902000  | 0.281451000  |
| H | -1.793191000 | 1.626354000  | -0.325363000 |
| H | -3.458714000 | -2.351348000 | -0.239302000 |
| C | -1.131401000 | -1.112913000 | -0.515579000 |
| O | -1.060202000 | -2.173141000 | -1.073081000 |
| N | -0.045864000 | -0.399765000 | -0.044895000 |
| H | -0.195339000 | 0.414868000  | 0.543470000  |
| N | 1.205495000  | -0.871308000 | -0.222172000 |
| C | 2.148182000  | -0.146453000 | 0.259876000  |
| C | 3.536903000  | -0.547075000 | 0.179171000  |
| C | 4.570536000  | 0.434133000  | 0.077999000  |
| C | 5.931519000  | 0.015873000  | 0.045897000  |
| C | 6.252876000  | -1.393876000 | 0.083954000  |

|                                              |              |              |                             |
|----------------------------------------------|--------------|--------------|-----------------------------|
| C                                            | 5.297028000  | -2.333188000 | 0.168436000                 |
| C                                            | 3.877549000  | -1.976196000 | 0.278743000                 |
| H                                            | 1.918947000  | 0.806495000  | 0.749030000                 |
| C                                            | 5.318446000  | 2.743545000  | -0.118575000                |
| C                                            | 4.299030000  | 1.821851000  | -0.030427000                |
| C                                            | 6.949322000  | 0.971631000  | -0.049241000                |
| C                                            | 6.655212000  | 2.320825000  | -0.121632000                |
| H                                            | 5.085015000  | 3.798174000  | -0.197537000                |
| H                                            | 3.276030000  | 2.172816000  | -0.063337000                |
| H                                            | 7.980160000  | 0.635713000  | -0.071170000                |
| H                                            | 7.453935000  | 3.048705000  | -0.193955000                |
| H                                            | 5.521192000  | -3.392207000 | 0.203003000                 |
| H                                            | 7.300719000  | -1.672120000 | 0.036399000                 |
| O                                            | 3.031972000  | -2.836167000 | 0.501772000                 |
| N                                            | -5.997661000 | -1.593208000 | 0.176190000                 |
| O                                            | -7.070268000 | -1.058510000 | 0.338495000                 |
| O                                            | -5.802899000 | -2.783566000 | 0.112562000                 |
| N                                            | -4.049236000 | 2.927813000  | 0.066998000                 |
| O                                            | -3.042071000 | 3.595668000  | -0.014124000                |
| O                                            | -5.169793000 | 3.357571000  | 0.201280000                 |
| Zero-point correction=                       |              |              | 0.274442 (Hartree/Particle) |
| Thermal correction to Energy=                |              |              | 0.297425                    |
| Thermal correction to Enthalpy=              |              |              | 0.298369                    |
| Thermal correction to Gibbs Free Energy=     |              |              | 0.216717                    |
| Sum of electronic and zero-point Energies=   |              |              | -1362.188631                |
| Sum of electronic and thermal Energies=      |              |              | -1362.165648                |
| Sum of electronic and thermal Enthalpies=    |              |              | -1362.164704                |
| Sum of electronic and thermal Free Energies= |              |              | -1362.246356                |

#### 4-Cationic Radical

|   |              |              |              |
|---|--------------|--------------|--------------|
| C | -5.117636000 | 0.572115000  | 0.064143000  |
| C | -4.061425000 | 1.419424000  | -0.216680000 |
| C | -2.750716000 | 0.982710000  | -0.309464000 |
| C | -2.481629000 | -0.367625000 | -0.102319000 |
| C | -3.520082000 | -1.260130000 | 0.169302000  |
| C | -4.807484000 | -0.765671000 | 0.252559000  |
| H | -6.136371000 | 0.933498000  | 0.130282000  |
| H | -1.993361000 | 1.709845000  | -0.574807000 |
| H | -3.325202000 | -2.316172000 | 0.311780000  |
| C | -1.110887000 | -0.940923000 | -0.200128000 |
| O | -0.868023000 | -2.090865000 | -0.421962000 |
| N | -0.052042000 | -0.018962000 | 0.008744000  |
| H | -0.218591000 | 0.922880000  | 0.353949000  |
| N | 1.173112000  | -0.480681000 | -0.121965000 |
| C | 2.210615000  | 0.257466000  | 0.119992000  |
| C | 3.515963000  | -0.314234000 | -0.037968000 |
| C | 4.703195000  | 0.461725000  | 0.177942000  |
| C | 5.975226000  | -0.160855000 | 0.037684000  |
| C | 6.054270000  | -1.549255000 | -0.325040000 |
| C | 4.945822000  | -2.299063000 | -0.544086000 |
| C | 3.661332000  | -1.716430000 | -0.411428000 |
| H | 2.095726000  | 1.290223000  | 0.441396000  |
| C | 5.841137000  | 2.544536000  | 0.725410000  |
| C | 4.672228000  | 1.833169000  | 0.523003000  |
| C | 7.142295000  | 0.573516000  | 0.246423000  |
| C | 7.081105000  | 1.919437000  | 0.590310000  |
| H | 5.789396000  | 3.593453000  | 0.988263000  |
| H | 3.735219000  | 2.361341000  | 0.631584000  |
| H | 8.102438000  | 0.082459000  | 0.136333000  |

|                                              |              |              |                             |
|----------------------------------------------|--------------|--------------|-----------------------------|
| H                                            | 7.993529000  | 2.480235000  | 0.749811000                 |
| H                                            | 4.990638000  | -3.344443000 | -0.819933000                |
| H                                            | 7.037614000  | -1.996069000 | -0.425092000                |
| O                                            | 2.656108000  | -2.503696000 | -0.634459000                |
| H                                            | 1.787569000  | -2.036924000 | -0.526093000                |
| N                                            | -5.914522000 | -1.711675000 | 0.555928000                 |
| O                                            | -7.026773000 | -1.247658000 | 0.603082000                 |
| O                                            | -5.608508000 | -2.866045000 | 0.732113000                 |
| N                                            | -4.335748000 | 2.862044000  | -0.435835000                |
| O                                            | -3.375510000 | 3.573467000  | -0.633782000                |
| O                                            | -5.486566000 | 3.212935000  | -0.395431000                |
| Zero-point correction=                       |              |              | 0.287233 (Hartree/Particle) |
| Thermal correction to Energy=                |              |              | 0.310221                    |
| Thermal correction to Enthalpy=              |              |              | 0.311165                    |
| Thermal correction to Gibbs Free Energy=     |              |              | 0.230083                    |
| Sum of electronic and zero-point Energies=   |              |              | -1362.552391                |
| Sum of electronic and thermal Energies=      |              |              | -1362.529402                |
| Sum of electronic and thermal Enthalpies=    |              |              | -1362.528458                |
| Sum of electronic and thermal Free Energies= |              |              | -1362.609540                |

#### 4-N8-H Anion

|   |               |              |              |
|---|---------------|--------------|--------------|
| C | -5.059303000  | 0.651949000  | 0.000061000  |
| C | -3.936811000  | 1.465454000  | -0.000095000 |
| C | -2.640799000  | 0.971090000  | -0.000200000 |
| C | -2.4444446000 | -0.409913000 | -0.000129000 |
| C | -3.547869000  | -1.259571000 | 0.000045000  |
| C | -4.823419000  | -0.711644000 | 0.000128000  |
| H | -6.059261000  | 1.059034000  | 0.000126000  |
| H | -1.782772000  | 1.629643000  | -0.000323000 |
| H | -3.383309000  | -2.329817000 | 0.000099000  |
| C | -1.059032000  | -1.038319000 | -0.000255000 |
| O | -0.987485000  | -2.269948000 | -0.000510000 |
| N | -0.096630000  | -0.107194000 | -0.000043000 |
| N | 1.132948000   | -0.669451000 | -0.000221000 |
| C | 2.144037000   | 0.126868000  | 0.000038000  |
| C | 3.499888000   | -0.411771000 | 0.000001000  |
| C | 4.651918000   | 0.444180000  | 0.000083000  |
| C | 5.960101000   | -0.120970000 | 0.000068000  |
| C | 6.101423000   | -1.533841000 | -0.000048000 |
| C | 5.004298000   | -2.342633000 | -0.000144000 |
| C | 3.692918000   | -1.799278000 | -0.000122000 |
| H | 1.963448000   | 1.200663000  | 0.000404000  |
| C | 5.677621000   | 2.658404000  | 0.000257000  |
| C | 4.558747000   | 1.864163000  | 0.000175000  |
| C | 7.096540000   | 0.724065000  | 0.000162000  |
| C | 6.969300000   | 2.088467000  | 0.000259000  |
| H | 5.566117000   | 3.736878000  | 0.000314000  |
| H | 3.587918000   | 2.339977000  | 0.000171000  |
| H | 8.079065000   | 0.261984000  | 0.000154000  |
| H | 7.846163000   | 2.725188000  | 0.000333000  |
| H | 5.088912000   | -3.422932000 | -0.000249000 |
| H | 7.099686000   | -1.959480000 | -0.000072000 |
| O | 2.691682000   | -2.675462000 | -0.000231000 |
| H | 1.823346000   | -2.159203000 | -0.000380000 |
| N | -5.995464000  | -1.613110000 | 0.000300000  |
| O | -7.098560000  | -1.104010000 | -0.000441000 |
| O | -5.789318000  | -2.805923000 | 0.001149000  |
| N | -4.147260000  | 2.928644000  | -0.000137000 |
| O | -3.167856000  | 3.640495000  | -0.000095000 |

O -5.292856000 3.333052000 -0.000070000

Zero-point correction= 0.274150  
(Hartree/Particle)

Thermal correction to Energy= 0.296610  
Thermal correction to Enthalpy= 0.297555  
Thermal correction to Gibbs Free Energy= 0.218080  
Sum of electronic and zero-point Energies= -1362.346708  
Sum of electronic and thermal Energies= -1362.324247  
Sum of electronic and thermal Enthalpies= -1362.323303  
Sum of electronic and thermal Free Energies= -1362.402778

#### 4-O2'-H Anion

C -4.904749000 0.762144000 0.184185000  
C -3.752412000 1.453207000 -0.140817000  
C -2.533769000 0.829471000 -0.373671000  
C -2.452068000 -0.556988000 -0.270274000  
C -3.601594000 -1.289495000 0.031250000  
C -4.788120000 -0.616539000 0.262315000  
H -5.843660000 1.267097000 0.358232000  
H -1.683186000 1.435810000 -0.657725000  
H -3.547887000 -2.370368000 0.068579000  
C -1.195063000 -1.362067000 -0.544541000  
O -1.298923000 -2.500614000 -0.951419000  
N -0.054593000 -0.691695000 -0.277998000  
H -0.115003000 0.215188000 0.177620000  
N 1.194337000 -1.241510000 -0.473556000  
C 2.141795000 -0.427770000 -0.131087000  
C 3.548358000 -0.676048000 -0.107736000  
C 4.444899000 0.437019000 0.065483000  
C 5.829685000 0.210559000 0.322019000  
C 6.309341000 -1.144513000 0.363624000  
C 5.488244000 -2.190589000 0.145806000  
C 4.050003000 -2.039644000 -0.136421000  
H 1.842077000 0.569646000 0.224972000  
C 4.931655000 2.839776000 0.157041000  
C 4.048433000 1.799480000 -0.041679000  
C 6.710766000 1.285907000 0.516409000  
C 6.281989000 2.596365000 0.451940000  
H 4.576203000 3.860669000 0.062245000  
H 3.032861000 2.046403000 -0.323283000  
H 7.754782000 1.061402000 0.717149000  
H 6.972868000 3.417230000 0.602524000  
H 5.849867000 -3.213346000 0.166372000  
H 7.365555000 -1.302832000 0.568906000  
O 3.362211000 -3.043767000 -0.340669000  
N -6.002392000 -1.395655000 0.599335000  
O -7.027988000 -0.775456000 0.784362000  
O -5.893493000 -2.597461000 0.670140000  
N -3.832870000 2.925889000 -0.261667000  
O -2.818473000 3.518674000 -0.553845000  
O -4.908361000 3.445154000 -0.057501000

Zero-point correction= 0.274065  
(Hartree/Particle)

Thermal correction to Energy= 0.296996  
Thermal correction to Enthalpy= 0.297941  
Thermal correction to Gibbs Free Energy= 0.216861  
Sum of electronic and zero-point Energies= -1362.306124

|                                              |              |
|----------------------------------------------|--------------|
| Sum of electronic and thermal Energies=      | -1362.283193 |
| Sum of electronic and thermal Enthalpies=    | -1362.282248 |
| Sum of electronic and thermal Free Energies= | -1362.363328 |

**N'-(4-Hydroxybenzylidene)-3,5-dinitrobenzohydrazide (5)**

|   |              |              |              |
|---|--------------|--------------|--------------|
| C | 3.436635000  | 1.297299000  | 0.121502000  |
| C | 2.104638000  | 0.941275000  | 0.275381000  |
| C | 1.757499000  | -0.404199000 | 0.205170000  |
| C | 2.746038000  | -1.367968000 | 0.009371000  |
| C | 4.057143000  | -0.955816000 | -0.144114000 |
| C | 4.442643000  | 0.374114000  | -0.092148000 |
| H | 1.379796000  | 1.719733000  | 0.476809000  |
| H | 2.484955000  | -2.418663000 | -0.013819000 |
| H | 5.475673000  | 0.672611000  | -0.207174000 |
| N | 5.107414000  | -1.979807000 | -0.368975000 |
| O | 6.245522000  | -1.585553000 | -0.479182000 |
| O | 4.749880000  | -3.132348000 | -0.428054000 |
| N | 3.798353000  | 2.732400000  | 0.198396000  |
| O | 4.968595000  | 3.014577000  | 0.098436000  |
| O | 2.892936000  | 3.521836000  | 0.351646000  |
| C | 0.347036000  | -0.908451000 | 0.392048000  |
| O | 0.131945000  | -2.010712000 | 0.825679000  |
| N | -0.622736000 | -0.010823000 | 0.021363000  |
| N | -1.937344000 | -0.333317000 | 0.164029000  |
| C | -2.782116000 | 0.492719000  | -0.310619000 |
| H | -2.461896000 | 1.413642000  | -0.814498000 |
| C | -6.481032000 | 1.008275000  | -0.658887000 |
| C | -6.978430000 | -0.135760000 | -0.041809000 |
| C | -6.101857000 | -1.084490000 | 0.493162000  |
| C | -4.738743000 | -0.885612000 | 0.409553000  |
| C | -4.222819000 | 0.262008000  | -0.209749000 |
| C | -5.107296000 | 1.199811000  | -0.739219000 |
| H | -7.162282000 | 1.743739000  | -1.073904000 |
| H | -6.517034000 | -1.964957000 | 0.967209000  |
| H | -4.049728000 | -1.613922000 | 0.820240000  |
| H | -0.369639000 | 0.821922000  | -0.500570000 |
| H | -4.722306000 | 2.092658000  | -1.220891000 |
| O | -8.306158000 | -0.388947000 | 0.072483000  |
| H | -8.815142000 | 0.324017000  | -0.323010000 |

Zero-point correction=  
(Hartree/Particle)

0.240564

|                                              |              |
|----------------------------------------------|--------------|
| Thermal correction to Energy=                | 0.261175     |
| Thermal correction to Enthalpy=              | 0.262119     |
| Thermal correction to Gibbs Free Energy=     | 0.186875     |
| Sum of electronic and zero-point Energies=   | -1209.261902 |
| Sum of electronic and thermal Energies=      | -1209.241291 |
| Sum of electronic and thermal Enthalpies=    | -1209.240347 |
| Sum of electronic and thermal Free Energies= | -1209.315591 |

**5-N8-H Radical**

|   |              |              |              |
|---|--------------|--------------|--------------|
| C | -3.360904000 | 1.302045000  | 0.000009000  |
| C | -2.026670000 | 0.925603000  | -0.000124000 |
| C | -1.717570000 | -0.433076000 | -0.000148000 |
| C | -2.738524000 | -1.382554000 | -0.000061000 |
| C | -4.051947000 | -0.948334000 | 0.000060000  |
| C | -4.402807000 | 0.391945000  | 0.000100000  |
| H | -1.246563000 | 1.673642000  | -0.000225000 |
| H | -2.500729000 | -2.438920000 | -0.000093000 |
| H | -5.436506000 | 0.709080000  | 0.000202000  |
| N | -5.139615000 | -1.955907000 | 0.000126000  |

|   |              |              |              |
|---|--------------|--------------|--------------|
| O | -6.276510000 | -1.541702000 | 0.000210000  |
| O | -4.814806000 | -3.120346000 | 0.000109000  |
| N | -3.691843000 | 2.746786000  | 0.000052000  |
| O | -4.863648000 | 3.046650000  | 0.000335000  |
| O | -2.767039000 | 3.527019000  | -0.000200000 |
| C | -0.299019000 | -0.931815000 | -0.000254000 |
| O | -0.047991000 | -2.110582000 | -0.000345000 |
| N | 0.647293000  | 0.121280000  | -0.000281000 |
| N | 1.866098000  | -0.326698000 | -0.000182000 |
| C | 2.771679000  | 0.639612000  | -0.000167000 |
| H | 2.440881000  | 1.679761000  | -0.000215000 |
| C | 6.459226000  | 1.121412000  | 0.000084000  |
| C | 6.901042000  | -0.205946000 | 0.000164000  |
| C | 5.981462000  | -1.265083000 | 0.000158000  |
| C | 4.633292000  | -0.998369000 | 0.000053000  |
| C | 4.165781000  | 0.336391000  | -0.000043000 |
| C | 5.104070000  | 1.384719000  | -0.000020000 |
| H | 7.179180000  | 1.932841000  | 0.000102000  |
| H | 6.361283000  | -2.278805000 | 0.000234000  |
| H | 3.906908000  | -1.801703000 | 0.000038000  |
| H | 4.754962000  | 2.411446000  | -0.000079000 |
| O | 8.206998000  | -0.533665000 | 0.000258000  |
| H | 8.756346000  | 0.256139000  | 0.000221000  |

Zero-point correction=  
(Hartree/Particle)

0.227212

|                                              |              |
|----------------------------------------------|--------------|
| Thermal correction to Energy=                | 0.247606     |
| Thermal correction to Enthalpy=              | 0.248550     |
| Thermal correction to Gibbs Free Energy=     | 0.172294     |
| Sum of electronic and zero-point Energies=   | -1208.625878 |
| Sum of electronic and thermal Energies=      | -1208.605484 |
| Sum of electronic and thermal Enthalpies=    | -1208.604540 |
| Sum of electronic and thermal Free Energies= | -1208.680795 |

### 5-O4'-H Radical

|   |              |              |              |
|---|--------------|--------------|--------------|
| C | -3.376237000 | 1.295445000  | -0.124400000 |
| C | -2.042322000 | 0.942190000  | -0.264266000 |
| C | -1.694419000 | -0.403011000 | -0.189953000 |
| C | -2.682340000 | -1.369428000 | -0.003059000 |
| C | -3.995377000 | -0.959317000 | 0.136298000  |
| C | -4.382282000 | 0.370042000  | 0.079476000  |
| H | -1.318695000 | 1.723522000  | -0.459342000 |
| H | -2.421219000 | -2.420032000 | 0.025726000  |
| H | -5.417174000 | 0.666696000  | 0.184031000  |
| N | -5.045942000 | -1.985805000 | 0.351385000  |
| O | -6.185057000 | -1.593027000 | 0.450298000  |
| O | -4.685295000 | -3.137010000 | 0.413870000  |
| N | -3.738941000 | 2.730587000  | -0.205452000 |
| O | -4.910128000 | 3.010411000  | -0.117665000 |
| O | -2.832112000 | 3.519956000  | -0.349561000 |
| C | -0.283653000 | -0.902236000 | -0.361488000 |
| O | -0.048739000 | -2.002169000 | -0.782793000 |
| N | 0.689087000  | 0.005162000  | 0.015856000  |
| N | 1.990274000  | -0.311911000 | -0.128819000 |
| C | 2.847498000  | 0.524663000  | 0.336472000  |
| H | 2.534110000  | 1.449332000  | 0.833679000  |
| C | 6.521139000  | 1.026848000  | 0.652033000  |
| C | 7.058108000  | -0.169765000 | 0.013629000  |
| C | 6.088324000  | -1.126173000 | -0.513652000 |



|   |             |              |              |
|---|-------------|--------------|--------------|
| C | 4.751216000 | -0.905433000 | -0.411592000 |
| C | 4.263754000 | 0.275145000  | 0.219108000  |
| C | 5.175361000 | 1.226370000  | 0.743476000  |
| H | 7.238662000 | 1.737505000  | 1.043683000  |
| H | 6.489133000 | -2.014491000 | -0.986885000 |
| H | 4.029953000 | -1.613633000 | -0.801406000 |
| H | 0.429994000 | 0.844730000  | 0.525189000  |
| H | 4.785033000 | 2.119844000  | 1.220209000  |
| O | 8.273362000 | -0.362130000 | -0.075170000 |

Zero-point correction=  
(Hartree/Particle)

0.227163

|                                              |              |
|----------------------------------------------|--------------|
| Thermal correction to Energy=                | 0.247434     |
| Thermal correction to Enthalpy=              | 0.248378     |
| Thermal correction to Gibbs Free Energy=     | 0.173290     |
| Sum of electronic and zero-point Energies=   | -1208.627005 |
| Sum of electronic and thermal Energies=      | -1208.606734 |
| Sum of electronic and thermal Enthalpies=    | -1208.605790 |
| Sum of electronic and thermal Free Energies= | -1208.680879 |

### 5-Cationic Radical

|   |              |              |              |
|---|--------------|--------------|--------------|
| C | -3.416373000 | 1.286898000  | -0.126778000 |
| C | -2.078483000 | 0.937818000  | -0.202075000 |
| C | -1.735586000 | -0.409338000 | -0.116704000 |
| C | -2.727399000 | -1.382899000 | 0.020350000  |
| C | -4.044596000 | -0.973684000 | 0.093633000  |
| C | -4.428399000 | 0.356686000  | 0.023301000  |
| H | -1.358538000 | 1.731126000  | -0.361659000 |
| H | -2.474757000 | -2.435336000 | 0.068180000  |
| H | -5.469259000 | 0.650813000  | 0.079416000  |
| N | -5.102680000 | -2.007041000 | 0.254962000  |
| O | -6.241837000 | -1.613788000 | 0.298081000  |
| O | -4.733022000 | -3.153540000 | 0.331168000  |
| N | -3.769651000 | 2.726524000  | -0.215686000 |
| O | -4.940405000 | 3.004900000  | -0.193638000 |
| O | -2.847287000 | 3.507112000  | -0.299287000 |
| C | -0.330986000 | -0.892827000 | -0.215349000 |
| O | -0.001415000 | -1.985951000 | -0.548697000 |
| N | 0.664119000  | 0.078538000  | 0.160785000  |
| N | 1.918323000  | -0.220758000 | 0.002970000  |
| C | 2.822926000  | 0.641613000  | 0.412985000  |
| H | 2.537470000  | 1.586588000  | 0.881590000  |
| C | 6.504127000  | 1.004822000  | 0.524502000  |
| C | 6.898055000  | -0.218771000 | -0.076111000 |
| C | 5.933871000  | -1.163856000 | -0.516709000 |
| C | 4.609652000  | -0.892496000 | -0.362264000 |
| C | 4.191000000  | 0.336107000  | 0.240405000  |
| C | 5.174383000  | 1.270988000  | 0.677275000  |
| H | 7.257916000  | 1.711427000  | 0.853571000  |
| H | 6.287505000  | -2.082693000 | -0.967100000 |
| H | 3.854735000  | -1.596994000 | -0.688693000 |
| H | 0.385394000  | 0.947873000  | 0.617638000  |
| H | 4.857338000  | 2.201593000  | 1.134332000  |
| O | 8.157043000  | -0.545141000 | -0.257022000 |
| H | 8.773655000  | 0.129659000  | 0.057904000  |

Zero-point correction=  
(Hartree/Particle)

0.240988

|                                          |          |
|------------------------------------------|----------|
| Thermal correction to Energy=            | 0.261348 |
| Thermal correction to Enthalpy=          | 0.262292 |
| Thermal correction to Gibbs Free Energy= | 0.187248 |

|                                              |              |
|----------------------------------------------|--------------|
| Sum of electronic and zero-point Energies=   | -1208.966368 |
| Sum of electronic and thermal Energies=      | -1208.946008 |
| Sum of electronic and thermal Enthalpies=    | -1208.945064 |
| Sum of electronic and thermal Free Energies= | -1209.020108 |

### 5-N8-H Anion

|   |              |              |              |
|---|--------------|--------------|--------------|
| C | -3.372871000 | 1.304817000  | 0.000059000  |
| C | -2.036946000 | 0.929858000  | 0.000044000  |
| C | -1.714289000 | -0.427557000 | 0.000001000  |
| C | -2.737444000 | -1.372531000 | -0.000031000 |
| C | -4.057993000 | -0.943387000 | -0.000023000 |
| C | -4.417498000 | 0.393016000  | 0.000023000  |
| H | -1.240091000 | 1.661272000  | 0.000055000  |
| H | -2.474203000 | -2.422893000 | -0.000049000 |
| H | -5.450251000 | 0.707301000  | 0.000037000  |
| N | -5.143099000 | -1.947050000 | -0.000071000 |
| O | -6.288746000 | -1.541069000 | -0.000157000 |
| O | -4.830703000 | -3.116844000 | -0.000032000 |
| N | -3.715767000 | 2.742238000  | 0.000115000  |
| O | -4.893822000 | 3.041664000  | 0.000135000  |
| O | -2.806138000 | 3.541666000  | 0.000111000  |
| C | -0.273560000 | -0.934398000 | 0.000030000  |
| O | -0.111139000 | -2.157053000 | 0.000131000  |
| N | 0.590794000  | 0.086619000  | -0.000074000 |
| N | 1.884237000  | -0.323680000 | 0.000066000  |
| C | 2.749985000  | 0.619125000  | -0.000286000 |
| H | 2.434405000  | 1.667683000  | -0.000701000 |
| C | 6.486320000  | 1.119131000  | -0.000144000 |
| C | 6.945077000  | -0.191228000 | 0.000081000  |
| C | 6.033561000  | -1.247075000 | 0.000186000  |
| C | 4.674498000  | -0.988009000 | 0.000067000  |
| C | 4.186493000  | 0.329408000  | -0.000160000 |
| C | 5.115915000  | 1.370448000  | -0.000272000 |
| H | 7.194427000  | 1.943399000  | -0.000215000 |
| H | 6.413215000  | -2.262047000 | 0.000345000  |
| H | 3.952428000  | -1.796259000 | 0.000146000  |
| H | 4.762280000  | 2.396522000  | -0.000449000 |
| O | 8.282631000  | -0.503684000 | 0.000219000  |
| H | 8.790493000  | 0.310979000  | -0.000122000 |

|                                              |              |
|----------------------------------------------|--------------|
| Zero-point correction=                       | 0.226286     |
| (Hartree/Particle)                           |              |
| Thermal correction to Energy=                | 0.246806     |
| Thermal correction to Enthalpy=              | 0.247750     |
| Thermal correction to Gibbs Free Energy=     | 0.172143     |
| Sum of electronic and zero-point Energies=   | -1208.756473 |
| Sum of electronic and thermal Energies=      | -1208.735953 |
| Sum of electronic and thermal Enthalpies=    | -1208.735009 |
| Sum of electronic and thermal Free Energies= | -1208.810616 |

### 5-O4'-H Anion

|   |              |              |              |
|---|--------------|--------------|--------------|
| C | -3.301468000 | 1.334168000  | -0.118101000 |
| C | -1.996363000 | 0.898568000  | -0.301525000 |
| C | -1.720444000 | -0.465135000 | -0.228191000 |
| C | -2.766872000 | -1.363533000 | -0.009259000 |
| C | -4.048104000 | -0.874346000 | 0.171730000  |
| C | -4.358164000 | 0.475459000  | 0.123696000  |
| H | -1.230619000 | 1.630083000  | -0.525841000 |

|   |              |              |              |
|---|--------------|--------------|--------------|
| H | -2.560351000 | -2.426285000 | 0.005115000  |
| H | -5.367730000 | 0.835449000  | 0.258164000  |
| N | -5.153001000 | -1.830220000 | 0.419553000  |
| O | -6.264877000 | -1.369250000 | 0.564994000  |
| O | -4.875281000 | -3.005980000 | 0.462550000  |
| N | -3.585289000 | 2.784102000  | -0.203132000 |
| O | -4.733854000 | 3.137775000  | -0.051645000 |
| O | -2.650853000 | 3.524535000  | -0.414651000 |
| C | -0.350467000 | -1.070654000 | -0.446211000 |
| O | -0.257080000 | -2.211561000 | -0.856120000 |
| N | 0.669660000  | -0.244060000 | -0.134943000 |
| N | 1.983751000  | -0.615143000 | -0.283420000 |
| C | 2.823246000  | 0.258325000  | 0.180627000  |
| H | 2.436303000  | 1.183219000  | 0.638897000  |
| C | 6.405743000  | 1.118589000  | 0.691410000  |
| C | 7.121980000  | -0.017781000 | 0.136317000  |
| C | 6.268900000  | -1.067660000 | -0.407633000 |
| C | 4.907052000  | -0.985786000 | -0.395382000 |
| C | 4.237679000  | 0.140326000  | 0.156084000  |
| C | 5.039727000  | 1.178747000  | 0.693548000  |
| H | 7.005910000  | 1.921132000  | 1.106021000  |
| H | 6.773924000  | -1.930137000 | -0.829570000 |
| H | 4.300966000  | -1.786025000 | -0.808894000 |
| H | 0.468292000  | 0.636344000  | 0.329624000  |
| H | 4.542236000  | 2.048937000  | 1.119285000  |
| O | 8.363262000  | -0.091918000 | 0.124639000  |

Zero-point correction=  
(Hartree/Particle)

0.227040

|                                              |              |
|----------------------------------------------|--------------|
| Thermal correction to Energy=                | 0.247290     |
| Thermal correction to Enthalpy=              | 0.248234     |
| Thermal correction to Gibbs Free Energy=     | 0.173628     |
| Sum of electronic and zero-point Energies=   | -1208.744482 |
| Sum of electronic and thermal Energies=      | -1208.724232 |
| Sum of electronic and thermal Enthalpies=    | -1208.723288 |
| Sum of electronic and thermal Free Energies= | -1208.797893 |

### **N'-(4-(Dimethylamino)benzylidene)-3,5-dinitrobenzohydrazide (6)**

|   |              |              |              |
|---|--------------|--------------|--------------|
| C | -4.247340000 | 1.276284000  | -0.152639000 |
| C | -2.912813000 | 0.928216000  | -0.304042000 |
| C | -2.552324000 | -0.411449000 | -0.198227000 |
| C | -3.531256000 | -1.378068000 | 0.029070000  |
| C | -4.845447000 | -0.973951000 | 0.178271000  |
| C | -5.243736000 | 0.350455000  | 0.092212000  |
| H | -2.195794000 | 1.706907000  | -0.530871000 |
| H | -3.259879000 | -2.425195000 | 0.078802000  |
| H | -6.278790000 | 0.642560000  | 0.204499000  |
| N | -5.884966000 | -2.000678000 | 0.436578000  |
| O | -7.026172000 | -1.614022000 | 0.543853000  |
| O | -5.517387000 | -3.148388000 | 0.523540000  |
| N | -4.623198000 | 2.705039000  | -0.267552000 |
| O | -5.795872000 | 2.979029000  | -0.170184000 |
| O | -3.726517000 | 3.498931000  | -0.446832000 |
| C | -1.137717000 | -0.908593000 | -0.379878000 |
| O | -0.919231000 | -2.021116000 | -0.788320000 |
| N | -0.176553000 | 0.004367000  | -0.037126000 |
| N | 1.144085000  | -0.305910000 | -0.176751000 |
| C | 1.975134000  | 0.548117000  | 0.277156000  |
| H | 1.633485000  | 1.474689000  | 0.757376000  |
| C | 5.659505000  | 1.166210000  | 0.625694000  |
| C | 6.224668000  | 0.019241000  | 0.030901000  |

|   |              |              |              |
|---|--------------|--------------|--------------|
| C | 5.338191000  | -0.963133000 | -0.472165000 |
| C | 3.971666000  | -0.794337000 | -0.396370000 |
| C | 3.416429000  | 0.352071000  | 0.186026000  |
| C | 4.285016000  | 1.319174000  | 0.693181000  |
| H | 6.291629000  | 1.940069000  | 1.037138000  |
| H | 5.724961000  | -1.865491000 | -0.924307000 |
| H | 3.307793000  | -1.556593000 | -0.787357000 |
| H | -0.436395000 | 0.848976000  | 0.461920000  |
| H | 3.879140000  | 2.213905000  | 1.155337000  |
| N | 7.585554000  | -0.140173000 | -0.060895000 |
| C | 8.130122000  | -1.400127000 | -0.529287000 |
| C | 8.460446000  | 0.809051000  | 0.598045000  |
| H | 7.828170000  | -2.241054000 | 0.106932000  |
| H | 7.809526000  | -1.609051000 | -1.553426000 |
| H | 9.216179000  | -1.339115000 | -0.527008000 |
| H | 9.494538000  | 0.524325000  | 0.416941000  |
| H | 8.316206000  | 1.816564000  | 0.198124000  |
| H | 8.292952000  | 0.839567000  | 1.681984000  |

Zero-point correction=  
(Hartree/Particle)

0.309908

|                                              |              |
|----------------------------------------------|--------------|
| Thermal correction to Energy=                | 0.333707     |
| Thermal correction to Enthalpy=              | 0.334652     |
| Thermal correction to Gibbs Free Energy=     | 0.251826     |
| Sum of electronic and zero-point Energies=   | -1267.913163 |
| Sum of electronic and thermal Energies=      | -1267.889363 |
| Sum of electronic and thermal Enthalpies=    | -1267.888419 |
| Sum of electronic and thermal Free Energies= | -1267.971244 |

### 6-N8-H Radical

|   |              |              |              |
|---|--------------|--------------|--------------|
| C | -4.178134000 | 1.275256000  | 0.000078000  |
| C | -2.836503000 | 0.925564000  | -0.000014000 |
| C | -2.499112000 | -0.426457000 | -0.000081000 |
| C | -3.501145000 | -1.395357000 | -0.000071000 |
| C | -4.823684000 | -0.988000000 | 0.000015000  |
| C | -5.201970000 | 0.344591000  | 0.000101000  |
| H | -2.069584000 | 1.687180000  | -0.000033000 |
| H | -3.240376000 | -2.446201000 | -0.000127000 |
| H | -6.241627000 | 0.640953000  | 0.000192000  |
| N | -5.890604000 | -2.016761000 | 0.000012000  |
| O | -7.036376000 | -1.626357000 | 0.000223000  |
| O | -5.543705000 | -3.175087000 | -0.000198000 |
| N | -4.539005000 | 2.712430000  | 0.000157000  |
| O | -5.717163000 | 2.988742000  | 0.000513000  |
| O | -3.631531000 | 3.512846000  | -0.000131000 |
| C | -1.068066000 | -0.896841000 | -0.000149000 |
| O | -0.803075000 | -2.075214000 | -0.000165000 |
| N | -0.151654000 | 0.170894000  | -0.000209000 |
| N | 1.078735000  | -0.245585000 | -0.000197000 |
| C | 1.964979000  | 0.740450000  | -0.000278000 |
| H | 1.611363000  | 1.773271000  | -0.000304000 |
| C | 5.640921000  | 1.299685000  | -0.000125000 |
| C | 6.146788000  | -0.027824000 | 0.000003000  |
| C | 5.208701000  | -1.098577000 | -0.000011000 |
| C | 3.860749000  | -0.854656000 | -0.000112000 |
| C | 3.355992000  | 0.468562000  | -0.000204000 |
| C | 4.287250000  | 1.529401000  | -0.000214000 |
| H | 6.317575000  | 2.142046000  | -0.000103000 |
| H | 5.554339000  | -2.122475000 | -0.000004000 |
| H | 3.153112000  | -1.674901000 | -0.000145000 |
| H | 3.921266000  | 2.550726000  | -0.000290000 |

|   |             |              |              |
|---|-------------|--------------|--------------|
| N | 7.482940000 | -0.268951000 | 0.000119000  |
| C | 7.981391000 | -1.635506000 | 0.000759000  |
| C | 8.425602000 | 0.838010000  | -0.000118000 |
| H | 7.647025000 | -2.178080000 | 0.889657000  |
| H | 7.648018000 | -2.178604000 | -0.888199000 |
| H | 9.068083000 | -1.615591000 | 0.001372000  |
| H | 9.437659000 | 0.441806000  | -0.000442000 |
| H | 8.300996000 | 1.463206000  | -0.889146000 |
| H | 8.301515000 | 1.463223000  | 0.888980000  |

Zero-point correction=  
(Hartree/Particle)

0.297142

|                                              |              |
|----------------------------------------------|--------------|
| Thermal correction to Energy=                | 0.320659     |
| Thermal correction to Enthalpy=              | 0.321603     |
| Thermal correction to Gibbs Free Energy=     | 0.238379     |
| Sum of electronic and zero-point Energies=   | -1267.281893 |
| Sum of electronic and thermal Energies=      | -1267.258375 |
| Sum of electronic and thermal Enthalpies=    | -1267.257431 |
| Sum of electronic and thermal Free Energies= | -1267.340656 |

### 6-Cationic Radical

|   |              |              |              |
|---|--------------|--------------|--------------|
| C | -4.250073000 | 1.247600000  | -0.171160000 |
| C | -2.900840000 | 0.941156000  | -0.242121000 |
| C | -2.510820000 | -0.389384000 | -0.117825000 |
| C | -3.469259000 | -1.389534000 | 0.051382000  |
| C | -4.800047000 | -1.023682000 | 0.119683000  |
| C | -5.229981000 | 0.289537000  | 0.011061000  |
| H | -2.205356000 | 1.750185000  | -0.427588000 |
| H | -3.178724000 | -2.430338000 | 0.125820000  |
| H | -6.279564000 | 0.549986000  | 0.062439000  |
| N | -5.821368000 | -2.086237000 | 0.315310000  |
| O | -6.974056000 | -1.731792000 | 0.356321000  |
| O | -5.415373000 | -3.218607000 | 0.419743000  |
| N | -4.654037000 | 2.669646000  | -0.303354000 |
| O | -5.834400000 | 2.909065000  | -0.283036000 |
| O | -3.761844000 | 3.480997000  | -0.417168000 |
| C | -1.084975000 | -0.829867000 | -0.209072000 |
| O | -0.744923000 | -1.925564000 | -0.540087000 |
| N | -0.139958000 | 0.160964000  | 0.153228000  |
| N | 1.142068000  | -0.107219000 | 0.027148000  |
| C | 2.005313000  | 0.772777000  | 0.432254000  |
| H | 1.700569000  | 1.722764000  | 0.878449000  |
| C | 5.698841000  | 1.194195000  | 0.589956000  |
| C | 6.159370000  | -0.037256000 | 0.016860000  |
| C | 5.179206000  | -0.994183000 | -0.414490000 |
| C | 3.850149000  | -0.734780000 | -0.281787000 |
| C | 3.399287000  | 0.489716000  | 0.287699000  |
| C | 4.362405000  | 1.437865000  | 0.716277000  |
| H | 6.407082000  | 1.937594000  | 0.926267000  |
| H | 5.491798000  | -1.932191000 | -0.850352000 |
| H | 3.112543000  | -1.458084000 | -0.606984000 |
| H | -0.447003000 | 1.025101000  | 0.595125000  |
| H | 4.029252000  | 2.373186000  | 1.151662000  |
| N | 7.467153000  | -0.287609000 | -0.111926000 |
| C | 7.937570000  | -1.549459000 | -0.694767000 |
| C | 8.468275000  | 0.691502000  | 0.325591000  |
| H | 7.586454000  | -2.395079000 | -0.101067000 |
| H | 7.581521000  | -1.648554000 | -1.721660000 |
| H | 9.022608000  | -1.551141000 | -0.698572000 |

|   |             |             |              |
|---|-------------|-------------|--------------|
| H | 9.458171000 | 0.294864000 | 0.125322000  |
| H | 8.347680000 | 1.627677000 | -0.222099000 |
| H | 8.374197000 | 0.877192000 | 1.396959000  |

Zero-point correction= 0.310265  
(Hartree/Particle)

|                                              |              |
|----------------------------------------------|--------------|
| Thermal correction to Energy=                | 0.333975     |
| Thermal correction to Enthalpy=              | 0.334919     |
| Thermal correction to Gibbs Free Energy=     | 0.251584     |
| Sum of electronic and zero-point Energies=   | -1267.648334 |
| Sum of electronic and thermal Energies=      | -1267.624623 |
| Sum of electronic and thermal Enthalpies=    | -1267.623679 |
| Sum of electronic and thermal Free Energies= | -1267.707014 |

### 6-N8-H Anion

|   |              |              |              |
|---|--------------|--------------|--------------|
| C | -4.191274000 | 1.281338000  | 0.020021000  |
| C | -2.849509000 | 0.928303000  | 0.002146000  |
| C | -2.504475000 | -0.423697000 | -0.008729000 |
| C | -3.512156000 | -1.385213000 | -0.001515000 |
| C | -4.839555000 | -0.977689000 | 0.016237000  |
| C | -5.220951000 | 0.352548000  | 0.027487000  |
| H | -2.064320000 | 1.672256000  | -0.003602000 |
| H | -3.231592000 | -2.431013000 | -0.010203000 |
| H | -6.258595000 | 0.649854000  | 0.041282000  |
| N | -5.908032000 | -1.998839000 | 0.023702000  |
| O | -7.060255000 | -1.611912000 | 0.040280000  |
| O | -5.576940000 | -3.163516000 | 0.012893000  |
| N | -4.557763000 | 2.712733000  | 0.031820000  |
| O | -5.740660000 | 2.992750000  | 0.045396000  |
| O | -3.661703000 | 3.527329000  | 0.027386000  |
| C | -1.055583000 | -0.906525000 | -0.029020000 |
| O | -0.873953000 | -2.127266000 | -0.037586000 |
| N | -0.209748000 | 0.128454000  | -0.033779000 |
| N | 1.092443000  | -0.258120000 | -0.053664000 |
| C | 1.939090000  | 0.702003000  | -0.055315000 |
| H | 1.601193000  | 1.743708000  | -0.040874000 |
| C | 5.668913000  | 1.280698000  | -0.083596000 |
| C | 6.190309000  | -0.020643000 | -0.116550000 |
| C | 5.267709000  | -1.085453000 | -0.109908000 |
| C | 3.903258000  | -0.856184000 | -0.094046000 |
| C | 3.380608000  | 0.443947000  | -0.076204000 |
| C | 4.294928000  | 1.497306000  | -0.069810000 |
| H | 6.325910000  | 2.139526000  | -0.069182000 |
| H | 5.614505000  | -2.109908000 | -0.118614000 |
| H | 3.205025000  | -1.685400000 | -0.090325000 |
| H | 3.924274000  | 2.517692000  | -0.046316000 |
| N | 7.575453000  | -0.257643000 | -0.172952000 |
| C | 8.034477000  | -1.568303000 | 0.245950000  |
| C | 8.442634000  | 0.842753000  | 0.195701000  |
| H | 7.720071000  | -1.821111000 | 1.270008000  |
| H | 7.660193000  | -2.341446000 | -0.426560000 |
| H | 9.122965000  | -1.592965000 | 0.196731000  |
| H | 9.479402000  | 0.512772000  | 0.132497000  |
| H | 8.321541000  | 1.675507000  | -0.499295000 |
| H | 8.250509000  | 1.214228000  | 1.214504000  |

Zero-point correction= 0.296077  
(Hartree/Particle)

|                                 |          |
|---------------------------------|----------|
| Thermal correction to Energy=   | 0.319388 |
| Thermal correction to Enthalpy= | 0.320332 |

|                                              |              |
|----------------------------------------------|--------------|
| Thermal correction to Gibbs Free Energy=     | 0.238194     |
| Sum of electronic and zero-point Energies=   | -1267.402413 |
| Sum of electronic and thermal Energies=      | -1267.379103 |
| Sum of electronic and thermal Enthalpies=    | -1267.378159 |
| Sum of electronic and thermal Free Energies= | -1267.460296 |

**Table S6.** Cartesian coordinates of all the transition states and products of HAT reactions with HOO• and CH<sub>3</sub>OO• radicals including the zero point energy, ZPE, enthalpy, H, free energy, G, imaginary frequency calculated at the M06-2X/6-311+G(d,p) level of theory in the gas phase.

| <b>TS-1-O4'-H +HOO•</b>                    |              |              |              |
|--------------------------------------------|--------------|--------------|--------------|
| C                                          | 5.853897000  | 0.091886000  | -0.115678000 |
| C                                          | 4.962192000  | 1.121228000  | 0.119477000  |
| C                                          | 3.597224000  | 0.920051000  | 0.263188000  |
| C                                          | 3.095991000  | -0.373757000 | 0.160902000  |
| C                                          | 3.965331000  | -1.442105000 | -0.057112000 |
| C                                          | 5.316041000  | -1.182403000 | -0.199306000 |
| H                                          | 6.915219000  | 0.270032000  | -0.223059000 |
| H                                          | 2.968282000  | 1.773595000  | 0.482263000  |
| H                                          | 3.583993000  | -2.454500000 | -0.106112000 |
| C                                          | 1.636782000  | -0.713030000 | 0.335502000  |
| O                                          | 1.287961000  | -1.788932000 | 0.743145000  |
| N                                          | 0.776685000  | 0.302881000  | -0.017640000 |
| H                                          | 1.127481000  | 1.114386000  | -0.516546000 |
| N                                          | -0.560470000 | 0.134011000  | 0.121880000  |
| C                                          | -1.308032000 | 1.066454000  | -0.321417000 |
| C                                          | -2.764582000 | 0.989491000  | -0.216641000 |
| C                                          | -3.537216000 | 2.059848000  | -0.709050000 |
| C                                          | -4.907875000 | 2.002882000  | -0.638252000 |
| C                                          | -5.562964000 | 0.894488000  | -0.061912000 |
| C                                          | -4.771914000 | -0.167063000 | 0.477023000  |
| C                                          | -3.386254000 | -0.109420000 | 0.366767000  |
| H                                          | -3.047823000 | 2.919338000  | -1.153153000 |
| H                                          | -5.535148000 | 2.795034000  | -1.027828000 |
| H                                          | -2.797705000 | -0.929586000 | 0.759216000  |
| O                                          | -5.279984000 | -1.265568000 | 1.051815000  |
| O                                          | -6.880229000 | 0.864449000  | -0.033890000 |
| H                                          | -7.266998000 | 0.029410000  | -0.648386000 |
| C                                          | -6.507449000 | -1.213859000 | 1.784605000  |
| H                                          | -7.360808000 | -1.398987000 | 1.133462000  |
| H                                          | -6.429206000 | -2.008163000 | 2.524266000  |
| H                                          | -6.621220000 | -0.249173000 | 2.280076000  |
| N                                          | 6.240374000  | -2.316743000 | -0.447945000 |
| O                                          | 5.750962000  | -3.418188000 | -0.529413000 |
| O                                          | 7.416251000  | -2.054620000 | -0.553002000 |
| N                                          | 5.488608000  | 2.502241000  | 0.231059000  |
| O                                          | 6.683933000  | 2.647821000  | 0.138599000  |
| O                                          | 4.680538000  | 3.387563000  | 0.403031000  |
| H                                          | -0.889932000 | 1.961583000  | -0.797007000 |
| O                                          | -8.794507000 | -1.366582000 | -0.771166000 |
| H                                          | -9.555090000 | -1.029493000 | -1.266632000 |
| O                                          | -7.714231000 | -0.858237000 | -1.421697000 |
| Zero-point correction=                     |              |              | 0.284435     |
| (Hartree/Particle)                         |              |              |              |
| Thermal correction to Energy=              |              | 0.310873     |              |
| Thermal correction to Enthalpy=            |              | 0.311817     |              |
| Thermal correction to Gibbs Free Energy=   |              | 0.220999     |              |
| Sum of electronic and zero-point Energies= |              | -1474.598757 |              |
| Sum of electronic and thermal Energies=    |              | -1474.572320 |              |
| Sum of electronic and thermal Enthalpies=  |              | -1474.571375 |              |

Sum of electronic and thermal Free Energies= -1474.662194

**TS-1-N8-H +HOO•**

|   |              |              |              |
|---|--------------|--------------|--------------|
| C | 4.891763000  | 0.153610000  | 0.286944000  |
| C | 3.805723000  | 0.968564000  | 0.550379000  |
| C | 2.497939000  | 0.528131000  | 0.457780000  |
| C | 2.254483000  | -0.775350000 | 0.045601000  |
| C | 3.315419000  | -1.639983000 | -0.206361000 |
| C | 4.606619000  | -1.151700000 | -0.081835000 |
| H | 5.909566000  | 0.511797000  | 0.363279000  |
| H | 1.686368000  | 1.188267000  | 0.725319000  |
| H | 3.138695000  | -2.667715000 | -0.498568000 |
| C | 0.841343000  | -1.264813000 | -0.083226000 |
| O | 0.509184000  | -2.378457000 | 0.223079000  |
| N | -0.015836000 | -0.318121000 | -0.656749000 |
| H | 0.376938000  | 0.739571000  | -1.067322000 |
| N | -1.302359000 | -0.414997000 | -0.359224000 |
| C | -2.081072000 | 0.565023000  | -0.683339000 |
| C | -3.513368000 | 0.468196000  | -0.502895000 |
| C | -4.312366000 | 1.569341000  | -0.824933000 |
| C | -5.689300000 | 1.501528000  | -0.680451000 |
| C | -6.285631000 | 0.333000000  | -0.215013000 |
| C | -5.487389000 | -0.780990000 | 0.123506000  |
| C | -4.119413000 | -0.705956000 | -0.023494000 |
| H | -3.851906000 | 2.479599000  | -1.191756000 |
| H | -6.311079000 | 2.353160000  | -0.936494000 |
| H | -3.515445000 | -1.569040000 | 0.230963000  |
| O | -6.066698000 | -1.940803000 | 0.536292000  |
| O | -7.622009000 | 0.196049000  | -0.068879000 |
| H | -8.070434000 | 0.998711000  | -0.351167000 |
| C | -6.612042000 | -1.896942000 | 1.853450000  |
| H | -7.402604000 | -1.147826000 | 1.924752000  |
| H | -7.025019000 | -2.884942000 | 2.044411000  |
| H | -5.822812000 | -1.681557000 | 2.579585000  |
| N | 5.743380000  | -2.059775000 | -0.368479000 |
| O | 5.475142000  | -3.187455000 | -0.710448000 |
| O | 6.857252000  | -1.606952000 | -0.237702000 |
| N | 4.037369000  | 2.380786000  | 0.911864000  |
| O | 5.160857000  | 2.711191000  | 1.194087000  |
| O | 3.073371000  | 3.124814000  | 0.891196000  |
| H | -1.670643000 | 1.498250000  | -1.073813000 |
| O | 0.326516000  | 2.769579000  | -0.384548000 |
| H | 1.165303000  | 3.099320000  | -0.019360000 |
| O | 0.721253000  | 1.904185000  | -1.382876000 |

Zero-point correction=  
(Hartree/Particle)

0.285532

|                                              |              |
|----------------------------------------------|--------------|
| Thermal correction to Energy=                | 0.311524     |
| Thermal correction to Enthalpy=              | 0.312468     |
| Thermal correction to Gibbs Free Energy=     | 0.224886     |
| Sum of electronic and zero-point Energies=   | -1474.596043 |
| Sum of electronic and thermal Energies=      | -1474.570051 |
| Sum of electronic and thermal Enthalpies=    | -1474.569107 |
| Sum of electronic and thermal Free Energies= | -1474.656689 |

**TS-2-O2'-H +HOO•**

|   |              |              |              |
|---|--------------|--------------|--------------|
| C | -5.774225000 | 0.501775000  | -0.235931000 |
| C | -4.559582000 | 1.160625000  | -0.284532000 |
| C | -3.343187000 | 0.507125000  | -0.179757000 |
| C | -3.333779000 | -0.872912000 | 0.002007000  |
| C | -4.533788000 | -1.578886000 | 0.037688000  |



|   |              |              |              |
|---|--------------|--------------|--------------|
| C | -5.720488000 | -0.874092000 | -0.074358000 |
| H | -6.715233000 | 1.027578000  | -0.323180000 |
| H | -2.430200000 | 1.084638000  | -0.268712000 |
| H | -4.533139000 | -2.656573000 | 0.145444000  |
| C | -2.041155000 | -1.647704000 | 0.090278000  |
| O | -1.954966000 | -2.793816000 | -0.268933000 |
| N | -1.018186000 | -0.897918000 | 0.611877000  |
| H | -1.206118000 | 0.051931000  | 0.919706000  |
| N | 0.284346000  | -1.239582000 | 0.450741000  |
| C | 1.089934000  | -0.344387000 | 0.900121000  |
| C | 2.509136000  | -0.401077000 | 0.680624000  |
| C | 3.266516000  | 0.804257000  | 0.826817000  |
| C | 4.647487000  | 0.790864000  | 0.637062000  |
| C | 5.321650000  | -0.389702000 | 0.300141000  |
| C | 4.538702000  | -1.580210000 | 0.110281000  |
| C | 3.181848000  | -1.571856000 | 0.293287000  |
| H | 5.153103000  | 1.739482000  | 0.737362000  |
| H | 2.603724000  | -2.478200000 | 0.157810000  |
| N | -7.001918000 | -1.619970000 | -0.020082000 |
| O | -6.937591000 | -2.816108000 | 0.138837000  |
| O | -8.019551000 | -0.976606000 | -0.137462000 |
| N | -4.548031000 | 2.631524000  | -0.455071000 |
| O | -5.607243000 | 3.177926000  | -0.644018000 |
| O | -3.471866000 | 3.188734000  | -0.386816000 |
| H | 0.705728000  | 0.534333000  | 1.417567000  |
| O | 2.664573000  | 1.939044000  | 1.136912000  |
| H | 1.800747000  | 2.089937000  | 0.537219000  |
| H | 5.018085000  | -2.506975000 | -0.168839000 |
| N | 6.679232000  | -0.433830000 | 0.162504000  |
| C | 7.350786000  | -1.603361000 | -0.400969000 |
| C | 7.130858000  | -1.778803000 | -1.904009000 |
| H | 7.038032000  | -2.498829000 | 0.141672000  |
| H | 8.415402000  | -1.483528000 | -0.196930000 |
| H | 7.534935000  | -0.929750000 | -2.456621000 |
| H | 7.631098000  | -2.684611000 | -2.252983000 |
| H | 6.069007000  | -1.859344000 | -2.142233000 |
| C | 7.480865000  | 0.765249000  | 0.382781000  |
| C | 7.542208000  | 1.696956000  | -0.828301000 |
| H | 8.486315000  | 0.438306000  | 0.653506000  |
| H | 7.084100000  | 1.289322000  | 1.254057000  |
| H | 8.073920000  | 2.615317000  | -0.571001000 |
| H | 8.069796000  | 1.222034000  | -1.657081000 |
| H | 6.539686000  | 1.961675000  | -1.168869000 |
| O | -0.426470000 | 2.209703000  | 0.276036000  |
| H | -0.856409000 | 3.047925000  | 0.049557000  |
| O | 0.781439000  | 2.247448000  | -0.386631000 |

Zero-point correction=

0.384604

(Hartree/Particle)

|                                              |              |
|----------------------------------------------|--------------|
| Thermal correction to Energy=                | 0.414760     |
| Thermal correction to Enthalpy=              | 0.415704     |
| Thermal correction to Gibbs Free Energy=     | 0.318141     |
| Sum of electronic and zero-point Energies=   | -1572.554594 |
| Sum of electronic and thermal Energies=      | -1572.524438 |
| Sum of electronic and thermal Enthalpies=    | -1572.523494 |
| Sum of electronic and thermal Free Energies= | -1572.621057 |

### TS-2-N8-H+HOO\*

|   |              |              |              |
|---|--------------|--------------|--------------|
| C | -5.995917000 | 0.077303000  | -0.089661000 |
| C | -5.030382000 | 1.030595000  | -0.357443000 |
| C | -3.684682000 | 0.728949000  | -0.495047000 |
| C | -3.282248000 | -0.598692000 | -0.363130000 |

|   |              |              |              |
|---|--------------|--------------|--------------|
| C | -4.226703000 | -1.591666000 | -0.112394000 |
| C | -5.555245000 | -1.230287000 | 0.025675000  |
| H | -7.039172000 | 0.339055000  | 0.019712000  |
| H | -2.986619000 | 1.527259000  | -0.711916000 |
| H | -3.919488000 | -2.626506000 | -0.029643000 |
| C | -1.849047000 | -1.041817000 | -0.502372000 |
| O | -1.564971000 | -2.189978000 | -0.727962000 |
| N | -0.929958000 | 0.002522000  | -0.389929000 |
| H | -1.253229000 | 0.848701000  | 0.341407000  |
| N | 0.353281000  | -0.368229000 | -0.297030000 |
| C | 1.187774000  | 0.627442000  | -0.194846000 |
| C | 2.595590000  | 0.381651000  | -0.093962000 |
| C | 3.505085000  | 1.454264000  | -0.014487000 |
| C | 4.871727000  | 1.241661000  | 0.069248000  |
| C | 5.402615000  | -0.065227000 | 0.068226000  |
| C | 4.482520000  | -1.149809000 | 0.002726000  |
| C | 3.133944000  | -0.920379000 | -0.075533000 |
| H | 5.513468000  | 2.105086000  | 0.181883000  |
| H | 2.441580000  | -1.751484000 | -0.138028000 |
| N | -6.558171000 | -2.285072000 | 0.305101000  |
| O | -6.152445000 | -3.418306000 | 0.420351000  |
| O | -7.713757000 | -1.938577000 | 0.399625000  |
| N | -5.460995000 | 2.439912000  | -0.512619000 |
| O | -6.618062000 | 2.694303000  | -0.266701000 |
| O | -4.627350000 | 3.237301000  | -0.875326000 |
| H | 0.837482000  | 1.658759000  | -0.192497000 |
| O | 2.982428000  | 2.703256000  | -0.007756000 |
| H | 3.681937000  | 3.360414000  | 0.042063000  |
| H | 4.841752000  | -2.168142000 | -0.016048000 |
| N | 6.749615000  | -0.303306000 | 0.128118000  |
| C | 7.238161000  | -1.600439000 | 0.600011000  |
| C | 7.556339000  | -2.590552000 | -0.518419000 |
| H | 6.498334000  | -2.022180000 | 1.282929000  |
| H | 8.130560000  | -1.415903000 | 1.203204000  |
| H | 6.686281000  | -2.751100000 | -1.157026000 |
| H | 8.368637000  | -2.225794000 | -1.147525000 |
| H | 7.855816000  | -3.551740000 | -0.094726000 |
| C | 7.713992000  | 0.791951000  | 0.086101000  |
| C | 9.027708000  | 0.415346000  | -0.591460000 |
| H | 7.905645000  | 1.167357000  | 1.101564000  |
| H | 7.275302000  | 1.605264000  | -0.488924000 |
| H | 9.675989000  | 1.292826000  | -0.619710000 |
| H | 9.565170000  | -0.372516000 | -0.062444000 |
| H | 8.849489000  | 0.087896000  | -1.617118000 |
| O | -0.302015000 | 1.445689000  | 2.095786000  |
| H | -0.441470000 | 0.865995000  | 2.857253000  |
| O | -1.517732000 | 1.449335000  | 1.455822000  |

Zero-point correction=  
(Hartree/Particle)

0.384289

|                                              |              |
|----------------------------------------------|--------------|
| Thermal correction to Energy=                | 0.414705     |
| Thermal correction to Enthalpy=              | 0.415649     |
| Thermal correction to Gibbs Free Energy=     | 0.317420     |
| Sum of electronic and zero-point Energies=   | -1572.552220 |
| Sum of electronic and thermal Energies=      | -1572.521804 |
| Sum of electronic and thermal Enthalpies=    | -1572.520860 |
| Sum of electronic and thermal Free Energies= | -1572.619089 |

**TS-2-C7'-H +HOO•**

|   |             |             |              |
|---|-------------|-------------|--------------|
| C | 6.612159000 | 0.502594000 | -0.014027000 |
| C | 5.545618000 | 1.314357000 | 0.322812000  |
| C | 4.242279000 | 0.848627000 | 0.419492000  |

|   |              |              |              |
|---|--------------|--------------|--------------|
| C | 3.989074000  | -0.494797000 | 0.160610000  |
| C | 5.041321000  | -1.350431000 | -0.163245000 |
| C | 6.319763000  | -0.830589000 | -0.252739000 |
| H | 7.621068000  | 0.885689000  | -0.082089000 |
| H | 3.465774000  | 1.539045000  | 0.723701000  |
| H | 4.853717000  | -2.403284000 | -0.333160000 |
| C | 2.617993000  | -1.117671000 | 0.271342000  |
| O | 2.485518000  | -2.281550000 | 0.553109000  |
| N | 1.587605000  | -0.250213000 | 0.019219000  |
| H | 1.778662000  | 0.662821000  | -0.380697000 |
| N | 0.297233000  | -0.675719000 | 0.115308000  |
| C | -0.596995000 | 0.156247000  | -0.252133000 |
| C | -2.014367000 | -0.185917000 | -0.184701000 |
| C | -2.978058000 | 0.747011000  | -0.577657000 |
| C | -4.335172000 | 0.446750000  | -0.521922000 |
| C | -4.760704000 | -0.800522000 | -0.064515000 |
| C | -3.799028000 | -1.746372000 | 0.335381000  |
| C | -2.457376000 | -1.435201000 | 0.270003000  |
| H | -5.047391000 | 1.214054000  | -0.795512000 |
| H | -1.710756000 | -2.164880000 | 0.560191000  |
| N | 7.437134000  | -1.737539000 | -0.613886000 |
| O | 7.161019000  | -2.893528000 | -0.831700000 |
| O | 8.544364000  | -1.253305000 | -0.666568000 |
| N | 5.808362000  | 2.745771000  | 0.602763000  |
| O | 6.955284000  | 3.120674000  | 0.540794000  |
| O | 4.853089000  | 3.439971000  | 0.870001000  |
| H | -0.342187000 | 1.151633000  | -0.627596000 |
| O | -2.550518000 | 1.967945000  | -0.999184000 |
| H | -3.309745000 | 2.536608000  | -1.163799000 |
| H | -4.106138000 | -2.733544000 | 0.653746000  |
| N | -6.130790000 | -1.123901000 | -0.023379000 |
| C | -6.650767000 | -1.665915000 | 1.237352000  |
| C | -6.956140000 | -0.558671000 | 2.245875000  |
| H | -5.909725000 | -2.349680000 | 1.646265000  |
| H | -7.540779000 | -2.256871000 | 1.018312000  |
| H | -7.311853000 | -0.988718000 | 3.184029000  |
| H | -6.056026000 | 0.025830000  | 2.447833000  |
| H | -7.719226000 | 0.124957000  | 1.866926000  |
| C | -7.019221000 | -0.355964000 | -0.812660000 |
| C | -8.436694000 | -0.882752000 | -0.922332000 |
| H | -6.570165000 | -0.168499000 | -1.791386000 |
| H | -7.115318000 | 0.782375000  | -0.353508000 |
| H | -8.986325000 | -0.271279000 | -1.638483000 |
| H | -8.444562000 | -1.917461000 | -1.276849000 |
| H | -8.970645000 | -0.835370000 | 0.028136000  |
| O | -6.581584000 | 2.790151000  | -0.992860000 |
| H | -7.328890000 | 3.123146000  | -1.505802000 |
| O | -7.170722000 | 2.083385000  | 0.043653000  |

Zero-point correction=  
(Hartree/Particle)

0.383981

|                                              |              |
|----------------------------------------------|--------------|
| Thermal correction to Energy=                | 0.414364     |
| Thermal correction to Enthalpy=              | 0.415308     |
| Thermal correction to Gibbs Free Energy=     | 0.316737     |
| Sum of electronic and zero-point Energies=   | -1572.553231 |
| Sum of electronic and thermal Energies=      | -1572.522849 |
| Sum of electronic and thermal Enthalpies=    | -1572.521905 |
| Sum of electronic and thermal Free Energies= | -1572.620475 |

### TS-3-N8-H+HOO•

|   |             |             |              |
|---|-------------|-------------|--------------|
| C | 3.041587000 | 1.159600000 | -0.450457000 |
| C | 1.706239000 | 0.831695000 | -0.617421000 |

|   |              |              |              |
|---|--------------|--------------|--------------|
| C | 1.323683000  | -0.496917000 | -0.449885000 |
| C | 2.272068000  | -1.468547000 | -0.139634000 |
| C | 3.589446000  | -1.080344000 | 0.024734000  |
| C | 4.011735000  | 0.230687000  | -0.120616000 |
| H | 0.997460000  | 1.606529000  | -0.877538000 |
| H | 1.980555000  | -2.505070000 | -0.026275000 |
| H | 5.046977000  | 0.513144000  | 0.013094000  |
| N | 3.452952000  | 2.571458000  | -0.634523000 |
| O | 4.609191000  | 2.843515000  | -0.407381000 |
| O | 2.603564000  | 3.351926000  | -0.997671000 |
| N | 4.598420000  | -2.108050000 | 0.375405000  |
| O | 5.745422000  | -1.740766000 | 0.486511000  |
| O | 4.203267000  | -3.240805000 | 0.526623000  |
| C | -0.097781000 | -0.949892000 | -0.598216000 |
| O | -0.391826000 | -2.082090000 | -0.875006000 |
| N | -1.029980000 | 0.086420000  | -0.400327000 |
| H | -0.696538000 | 0.876177000  | 0.455731000  |
| N | -2.305110000 | -0.273777000 | -0.449709000 |
| C | -3.184155000 | 0.343709000  | 0.243693000  |
| H | -2.869997000 | 1.071185000  | 0.999727000  |
| C | -5.080928000 | -0.865706000 | -0.834194000 |
| C | -4.611269000 | 0.086556000  | 0.079743000  |
| C | -5.520304000 | 0.815669000  | 0.850895000  |
| C | -6.885937000 | 0.602490000  | 0.709417000  |
| C | -7.347333000 | -0.342509000 | -0.200321000 |
| C | -6.443007000 | -1.075818000 | -0.969740000 |
| H | -4.365828000 | -1.432827000 | -1.418170000 |
| H | -5.154036000 | 1.552607000  | 1.557878000  |
| H | -7.587414000 | 1.171126000  | 1.307293000  |
| H | -8.411725000 | -0.512188000 | -0.310377000 |
| H | -6.806496000 | -1.814355000 | -1.673783000 |
| O | 0.445765000  | 0.692894000  | 2.216629000  |
| H | -0.066445000 | 0.424320000  | 2.991648000  |
| O | -0.430977000 | 1.471946000  | 1.497402000  |

Zero-point correction=  
(Hartree/Particle)

0.247746

|                                              |              |
|----------------------------------------------|--------------|
| Thermal correction to Energy=                | 0.270224     |
| Thermal correction to Enthalpy=              | 0.271168     |
| Thermal correction to Gibbs Free Energy=     | 0.190542     |
| Sum of electronic and zero-point Energies=   | -1284.900868 |
| Sum of electronic and thermal Energies=      | -1284.878390 |
| Sum of electronic and thermal Enthalpies=    | -1284.877446 |
| Sum of electronic and thermal Free Energies= | -1284.958071 |

### TS-4-N8-H+HOO\*

|   |              |              |              |
|---|--------------|--------------|--------------|
| C | -4.995983000 | 0.485739000  | 0.032891000  |
| C | -3.886983000 | 1.237535000  | -0.312559000 |
| C | -2.636425000 | 0.685347000  | -0.520916000 |
| C | -2.463976000 | -0.679641000 | -0.319812000 |
| C | -3.551959000 | -1.476882000 | 0.025080000  |
| C | -4.790144000 | -0.875762000 | 0.184577000  |
| H | -5.969444000 | 0.933232000  | 0.181792000  |
| H | -1.819192000 | 1.312470000  | -0.846835000 |
| H | -3.428058000 | -2.543150000 | 0.169324000  |
| C | -1.113708000 | -1.325473000 | -0.436610000 |
| O | -0.976580000 | -2.511255000 | -0.596834000 |
| N | -0.060077000 | -0.409691000 | -0.367924000 |
| H | -0.191402000 | 0.538181000  | 0.317101000  |
| N | 1.153277000  | -0.964676000 | -0.282124000 |
| C | 2.155260000  | -0.135446000 | -0.176742000 |
| C | 3.496193000  | -0.618518000 | -0.103230000 |

|   |              |              |              |
|---|--------------|--------------|--------------|
| C | 4.605505000  | 0.298205000  | 0.060409000  |
| C | 5.925511000  | -0.218068000 | 0.103754000  |
| C | 6.128507000  | -1.627272000 | -0.000980000 |
| C | 5.089364000  | -2.492090000 | -0.138848000 |
| C | 3.757388000  | -2.006302000 | -0.194553000 |
| H | 1.952205000  | 0.932410000  | -0.136545000 |
| C | 5.530645000  | 2.527045000  | 0.340042000  |
| C | 4.442351000  | 1.696957000  | 0.188853000  |
| C | 7.024117000  | 0.652868000  | 0.257767000  |
| C | 6.836110000  | 2.008961000  | 0.372682000  |
| H | 5.373588000  | 3.594522000  | 0.437548000  |
| H | 3.457716000  | 2.144701000  | 0.178173000  |
| H | 8.022230000  | 0.229372000  | 0.285891000  |
| H | 7.682480000  | 2.673739000  | 0.491385000  |
| H | 5.232474000  | -3.562230000 | -0.214982000 |
| H | 7.145160000  | -2.004188000 | 0.035292000  |
| O | 2.818011000  | -2.922422000 | -0.338294000 |
| H | 1.924704000  | -2.495112000 | -0.347914000 |
| N | -5.951430000 | -1.719487000 | 0.557941000  |
| O | -7.016768000 | -1.162232000 | 0.691025000  |
| O | -5.750373000 | -2.902381000 | 0.700027000  |
| N | -4.026447000 | 2.702226000  | -0.433214000 |
| O | -3.001301000 | 3.359689000  | -0.418323000 |
| O | -5.138898000 | 3.154957000  | -0.525029000 |
| O | -0.130308000 | 2.580652000  | 0.216635000  |
| H | -0.994220000 | 3.027359000  | 0.245261000  |
| O | -0.242049000 | 1.545104000  | 1.109659000  |

Zero-point correction=  
(Hartree/Particle)

0.300492

|                                              |              |
|----------------------------------------------|--------------|
| Thermal correction to Energy=                | 0.326086     |
| Thermal correction to Enthalpy=              | 0.327030     |
| Thermal correction to Gibbs Free Energy=     | 0.240707     |
| Sum of electronic and zero-point Energies=   | -1513.706375 |
| Sum of electronic and thermal Energies=      | -1513.680781 |
| Sum of electronic and thermal Enthalpies=    | -1513.679837 |
| Sum of electronic and thermal Free Energies= | -1513.766159 |

### TS-5-N8-H+HOO\*

|   |              |              |              |
|---|--------------|--------------|--------------|
| C | -3.490796000 | 1.166980000  | -0.321146000 |
| C | -2.162303000 | 0.810795000  | -0.490894000 |
| C | -1.813080000 | -0.533192000 | -0.376338000 |
| C | -2.791181000 | -1.489002000 | -0.109242000 |
| C | -4.099772000 | -1.073793000 | 0.060331000  |
| C | -4.488239000 | 0.251907000  | -0.037734000 |
| H | -1.436936000 | 1.580328000  | -0.721407000 |
| H | -2.526422000 | -2.536475000 | -0.038325000 |
| H | -5.517436000 | 0.555316000  | 0.096328000  |
| N | -5.139152000 | -2.088524000 | 0.357558000  |
| O | -6.276964000 | -1.695122000 | 0.475338000  |
| O | -4.775970000 | -3.236820000 | 0.462391000  |
| N | -3.864226000 | 2.595019000  | -0.455727000 |
| O | -5.009498000 | 2.891883000  | -0.205464000 |
| O | -2.997932000 | 3.362472000  | -0.806849000 |
| C | -0.404066000 | -1.030253000 | -0.551235000 |
| O | -0.162677000 | -2.183495000 | -0.789444000 |
| N | 0.562801000  | -0.016701000 | -0.452668000 |
| N | 1.825953000  | -0.451383000 | -0.391321000 |
| C | 2.709442000  | 0.490028000  | -0.247200000 |
| H | 2.408192000  | 1.537412000  | -0.185591000 |
| C | 6.398779000  | 0.964520000  | 0.033196000  |
| C | 6.849539000  | -0.353442000 | -0.057564000 |

|   |             |              |              |
|---|-------------|--------------|--------------|
| C | 5.939140000 | -1.407850000 | -0.205635000 |
| C | 4.589212000 | -1.142609000 | -0.261536000 |
| C | 4.117663000 | 0.181393000  | -0.175810000 |
| C | 5.040220000 | 1.223958000  | -0.026241000 |
| H | 7.109806000 | 1.775516000  | 0.149720000  |
| H | 6.323323000 | -2.417843000 | -0.271303000 |
| H | 3.870864000 | -1.945749000 | -0.373078000 |
| H | 0.293092000 | 0.829375000  | 0.349565000  |
| H | 4.684637000 | 2.246086000  | 0.045732000  |
| O | 8.158872000 | -0.678855000 | -0.006463000 |
| H | 8.698387000 | 0.110781000  | 0.095306000  |
| O | 1.323645000 | 1.293066000  | 2.069073000  |
| H | 1.178331000 | 0.690922000  | 2.812433000  |
| O | 0.096671000 | 1.365476000  | 1.456170000  |

Zero-point correction=

0.252757

(Hartree/Particle)

|                                              |              |
|----------------------------------------------|--------------|
| Thermal correction to Energy=                | 0.276301     |
| Thermal correction to Enthalpy=              | 0.277245     |
| Thermal correction to Gibbs Free Energy=     | 0.194369     |
| Sum of electronic and zero-point Energies=   | -1360.126079 |
| Sum of electronic and thermal Energies=      | -1360.102535 |
| Sum of electronic and thermal Enthalpies=    | -1360.101591 |
| Sum of electronic and thermal Free Energies= | -1360.184467 |

### TS-5-O4'-H +HOO•

|   |               |              |              |
|---|---------------|--------------|--------------|
| C | 4.260868000   | 1.395532000  | 0.120058000  |
| C | 2.949141000   | 0.965230000  | 0.254905000  |
| C | 2.681983000   | -0.398973000 | 0.196516000  |
| C | 3.727332000   | -1.306990000 | 0.030981000  |
| C | 5.014949000   | -0.821410000 | -0.104207000 |
| C | 5.321855000   | 0.529231000  | -0.063930000 |
| H | 2.178197000   | 1.704159000  | 0.433230000  |
| H | 3.528917000   | -2.371482000 | 0.015811000  |
| H | 6.338059000   | 0.885364000  | -0.165325000 |
| N | 6.126295000   | -1.786108000 | -0.297425000 |
| O | 7.241195000   | -1.327863000 | -0.392844000 |
| O | 5.835797000   | -2.957659000 | -0.347196000 |
| N | 4.537327000   | 2.850414000  | 0.183819000  |
| O | 5.690696000   | 3.198228000  | 0.100092000  |
| O | 3.584538000   | 3.586737000  | 0.311335000  |
| C | 1.300837000   | -0.979356000 | 0.364713000  |
| O | 1.132712000   | -2.084902000 | 0.805931000  |
| N | 0.283594000   | -0.140111000 | -0.036771000 |
| N | -1.004176000  | -0.532367000 | 0.096989000  |
| C | -1.897344000  | 0.236770000  | -0.395595000 |
| H | -1.633358000  | 1.167652000  | -0.911106000 |
| C | -5.605755000  | 0.494852000  | -0.788187000 |
| C | -6.045089000  | -0.678583000 | -0.120568000 |
| C | -5.081914000  | -1.546098000 | 0.462383000  |
| C | -3.744367000  | -1.262453000 | 0.364858000  |
| C | -3.312405000  | -0.089211000 | -0.290983000 |
| C | -4.258097000  | 0.779183000  | -0.854861000 |
| H | -6.346355000  | 1.149025000  | -1.231529000 |
| H | -5.443192000  | -2.431085000 | 0.971167000  |
| H | -3.000285000  | -1.922398000 | 0.794132000  |
| H | 0.497565000   | 0.703121000  | -0.560137000 |
| H | -3.922460000  | 1.678755000  | -1.360005000 |
| O | -7.308335000  | -0.979164000 | -0.045480000 |
| H | -7.916754000  | -0.012638000 | 0.083082000  |
| O | -9.692064000  | 0.995075000  | -0.061726000 |
| H | -10.248250000 | 1.180500000  | 0.707141000  |

|                                              |              |             |              |          |
|----------------------------------------------|--------------|-------------|--------------|----------|
| O                                            | -8.422704000 | 1.022034000 | 0.447483000  |          |
| Zero-point correction=                       |              |             |              | 0.251960 |
| (Hartree/Particle)                           |              |             |              |          |
| Thermal correction to Energy=                |              |             | 0.275811     |          |
| Thermal correction to Enthalpy=              |              |             | 0.276755     |          |
| Thermal correction to Gibbs Free Energy=     |              |             | 0.191565     |          |
| Sum of electronic and zero-point Energies=   |              |             | -1360.121209 |          |
| Sum of electronic and thermal Energies=      |              |             | -1360.097358 |          |
| Sum of electronic and thermal Enthalpies=    |              |             | -1360.096414 |          |
| Sum of electronic and thermal Free Energies= |              |             | -1360.181604 |          |

**TS-6-N8-H+HOO•**

|   |              |              |              |
|---|--------------|--------------|--------------|
| C | -4.230680000 | 1.121699000  | -0.325961000 |
| C | -2.894339000 | 0.790915000  | -0.485412000 |
| C | -2.518853000 | -0.545200000 | -0.360400000 |
| C | -3.480381000 | -1.517822000 | -0.094987000 |
| C | -4.798294000 | -1.127735000 | 0.064268000  |
| C | -5.212221000 | 0.189283000  | -0.043373000 |
| H | -2.183103000 | 1.574186000  | -0.713833000 |
| H | -3.194722000 | -2.559244000 | -0.017488000 |
| H | -6.247722000 | 0.473517000  | 0.082855000  |
| N | -5.819492000 | -2.160884000 | 0.358818000  |
| O | -6.965551000 | -1.789310000 | 0.470810000  |
| O | -5.436317000 | -3.302492000 | 0.467713000  |
| N | -4.632319000 | 2.540457000  | -0.473030000 |
| O | -5.779330000 | 2.819997000  | -0.208884000 |
| O | -3.786566000 | 3.319465000  | -0.847685000 |
| C | -1.098438000 | -1.018808000 | -0.523169000 |
| O | -0.841078000 | -2.171824000 | -0.753177000 |
| N | -0.154310000 | 0.006421000  | -0.425061000 |
| N | 1.121360000  | -0.391942000 | -0.359545000 |
| C | 1.981152000  | 0.578592000  | -0.248856000 |
| H | 1.648663000  | 1.617954000  | -0.214801000 |
| C | 5.655373000  | 1.172334000  | -0.015663000 |
| C | 6.180910000  | -0.142435000 | -0.066468000 |
| C | 5.262095000  | -1.221469000 | -0.170539000 |
| C | 3.908721000  | -0.993497000 | -0.222154000 |
| C | 3.389868000  | 0.315469000  | -0.177654000 |
| C | 4.295143000  | 1.383184000  | -0.070737000 |
| H | 6.315965000  | 2.023404000  | 0.066406000  |
| H | 5.622121000  | -2.239763000 | -0.208353000 |
| H | 3.216523000  | -1.823556000 | -0.299701000 |
| H | -0.443920000 | 0.862618000  | 0.310170000  |
| H | 3.913520000  | 2.398103000  | -0.029123000 |
| N | 7.523091000  | -0.367009000 | -0.015082000 |
| C | 8.040034000  | -1.723394000 | -0.075385000 |
| C | 8.443884000  | 0.750330000  | 0.097148000  |
| H | 7.678892000  | -2.324799000 | 0.764540000  |
| H | 7.751251000  | -2.217500000 | -1.008016000 |
| H | 9.125677000  | -1.691082000 | -0.029276000 |
| H | 9.461800000  | 0.369978000  | 0.127506000  |
| H | 8.355432000  | 1.425999000  | -0.759346000 |
| H | 8.264298000  | 1.322478000  | 1.012674000  |
| O | 0.546386000  | 1.445112000  | 2.051994000  |
| H | 0.390401000  | 0.886342000  | 2.825764000  |
| O | -0.673449000 | 1.484478000  | 1.419651000  |

|                                 |  |  |          |          |
|---------------------------------|--|--|----------|----------|
| Zero-point correction=          |  |  |          | 0.322297 |
| (Hartree/Particle)              |  |  |          |          |
| Thermal correction to Energy=   |  |  | 0.349105 |          |
| Thermal correction to Enthalpy= |  |  | 0.350049 |          |

|                                              |              |
|----------------------------------------------|--------------|
| Thermal correction to Gibbs Free Energy=     | 0.259484     |
| Sum of electronic and zero-point Energies=   | -1418.780458 |
| Sum of electronic and thermal Energies=      | -1418.753650 |
| Sum of electronic and thermal Enthalpies=    | -1418.752706 |
| Sum of electronic and thermal Free Energies= | -1418.843270 |

**TS-BHA(O-H) +HOO•**

|   |              |              |              |
|---|--------------|--------------|--------------|
| C | 2.052221000  | -0.970760000 | -0.595280000 |
| C | 2.104425000  | 0.294316000  | -0.002997000 |
| C | 0.929801000  | 1.040595000  | 0.186883000  |
| C | -0.316455000 | 0.572064000  | -0.183058000 |
| C | -0.371037000 | -0.722766000 | -0.793585000 |
| C | 0.817503000  | -1.455441000 | -0.986969000 |
| H | 2.943887000  | -1.559435000 | -0.760990000 |
| H | 1.052659000  | 2.010356000  | 0.649413000  |
| H | 0.727893000  | -2.422753000 | -1.469574000 |
| O | -1.509863000 | -1.255938000 | -1.203838000 |
| H | -1.828999000 | -2.012738000 | -0.473986000 |
| O | 3.239471000  | 0.888457000  | 0.418745000  |
| C | 4.461511000  | 0.196390000  | 0.244217000  |
| H | 5.234475000  | 0.848368000  | 0.642995000  |
| H | 4.459553000  | -0.748043000 | 0.796017000  |
| H | 4.655117000  | 0.004320000  | -0.814919000 |
| C | -1.584766000 | 1.398442000  | 0.026274000  |
| C | -2.258681000 | 1.659575000  | -1.334276000 |
| C | -2.551536000 | 0.648725000  | 0.961601000  |
| C | -1.272855000 | 2.756794000  | 0.665411000  |
| H | -1.581547000 | 2.202419000  | -1.999516000 |
| H | -2.554512000 | 0.729813000  | -1.817065000 |
| H | -3.150372000 | 2.274160000  | -1.182728000 |
| H | -3.428020000 | 1.276369000  | 1.145574000  |
| H | -2.890852000 | -0.292616000 | 0.533224000  |
| H | -2.072605000 | 0.434205000  | 1.919748000  |
| H | -0.822530000 | 2.646613000  | 1.655344000  |
| H | -0.607288000 | 3.358220000  | 0.040622000  |
| H | -2.205640000 | 3.311741000  | 0.786056000  |
| O | -1.034652000 | -2.140451000 | 1.432290000  |
| H | -0.195565000 | -2.605636000 | 1.288651000  |
| O | -1.919511000 | -2.737438000 | 0.594279000  |

Zero-point correction=  
(Hartree/Particle)

0.263479

|                                              |             |
|----------------------------------------------|-------------|
| Thermal correction to Energy=                | 0.279668    |
| Thermal correction to Enthalpy=              | 0.280612    |
| Thermal correction to Gibbs Free Energy=     | 0.220035    |
| Sum of electronic and zero-point Energies=   | -729.772984 |
| Sum of electronic and thermal Energies=      | -729.756795 |
| Sum of electronic and thermal Enthalpies=    | -729.755851 |
| Sum of electronic and thermal Free Energies= | -729.816428 |

**TS-1-O4'-H +CH<sub>3</sub>OO•**

|   |             |              |              |
|---|-------------|--------------|--------------|
| C | 6.130419000 | 0.450907000  | -0.158068000 |
| C | 5.145158000 | 1.298399000  | 0.312071000  |
| C | 3.818731000 | 0.914462000  | 0.445063000  |
| C | 3.455468000 | -0.379225000 | 0.084223000  |
| C | 4.423899000 | -1.270794000 | -0.375737000 |
| C | 5.730032000 | -0.832257000 | -0.494522000 |
| H | 7.159478000 | 0.769603000  | -0.252847000 |
| H | 3.112122000 | 1.624493000  | 0.855669000  |
| H | 4.152043000 | -2.288510000 | -0.626881000 |
| C | 2.050710000 | -0.914463000 | 0.219379000  |



|   |              |              |              |
|---|--------------|--------------|--------------|
| O | 1.844680000  | -2.086243000 | 0.401103000  |
| N | 1.073101000  | 0.043464000  | 0.109038000  |
| H | 1.309837000  | 0.973644000  | -0.220586000 |
| N | -0.235818000 | -0.303522000 | 0.239563000  |
| C | -1.093953000 | 0.607556000  | 0.006524000  |
| C | -2.530197000 | 0.357484000  | 0.124426000  |
| C | -3.432479000 | 1.386345000  | -0.127050000 |
| C | -4.800055000 | 1.174855000  | -0.022731000 |
| C | -5.293237000 | -0.082473000 | 0.338647000  |
| C | -4.375116000 | -1.137537000 | 0.606773000  |
| C | -3.019916000 | -0.898712000 | 0.495176000  |
| H | -3.072564000 | 2.370620000  | -0.406819000 |
| H | -5.511926000 | 1.964644000  | -0.225432000 |
| H | -2.337422000 | -1.715281000 | 0.699953000  |
| O | -4.795216000 | -2.393151000 | 0.902611000  |
| O | -6.594685000 | -0.338186000 | 0.420315000  |
| H | -7.531256000 | 0.706190000  | 0.244135000  |
| C | -5.719195000 | -2.516034000 | 1.975362000  |
| H | -6.704033000 | -2.133347000 | 1.690302000  |
| H | -5.791313000 | -3.579505000 | 2.192813000  |
| H | -5.357108000 | -1.978917000 | 2.856414000  |
| N | 6.758090000  | -1.775162000 | -1.000799000 |
| O | 6.387416000  | -2.884783000 | -1.302369000 |
| O | 7.892645000  | -1.363071000 | -1.076705000 |
| N | 5.524191000  | 2.677984000  | 0.698695000  |
| O | 6.690677000  | 2.977864000  | 0.607181000  |
| O | 4.635188000  | 3.408876000  | 1.075413000  |
| H | -0.791670000 | 1.619587000  | -0.290465000 |
| C | -7.791954000 | 1.107286000  | -2.471522000 |
| H | -8.378614000 | 0.698908000  | -3.293158000 |
| H | -6.857834000 | 0.548402000  | -2.355853000 |
| H | -7.585488000 | 2.166657000  | -2.635432000 |
| O | -7.943574000 | 1.511905000  | -0.247693000 |
| O | -8.597267000 | 0.936622000  | -1.318026000 |

Zero-point correction=  
(Hartree/Particle)

0.313239

|                                              |              |
|----------------------------------------------|--------------|
| Thermal correction to Energy=                | 0.341170     |
| Thermal correction to Enthalpy=              | 0.342115     |
| Thermal correction to Gibbs Free Energy=     | 0.246961     |
| Sum of electronic and zero-point Energies=   | -1513.843619 |
| Sum of electronic and thermal Energies=      | -1513.815687 |
| Sum of electronic and thermal Enthalpies=    | -1513.814743 |
| Sum of electronic and thermal Free Energies= | -1513.909896 |

**TS-1-N8-H +CH<sub>3</sub>OO•**

|   |              |              |              |
|---|--------------|--------------|--------------|
| C | 5.080018000  | 0.061410000  | 0.146776000  |
| C | 4.163047000  | 1.044405000  | 0.471921000  |
| C | 2.808933000  | 0.794489000  | 0.628957000  |
| C | 2.347425000  | -0.508799000 | 0.456815000  |
| C | 3.241428000  | -1.530982000 | 0.144349000  |
| C | 4.580889000  | -1.221010000 | -0.008860000 |
| H | 6.131481000  | 0.282047000  | 0.024357000  |
| H | 2.148948000  | 1.610072000  | 0.894638000  |
| H | 2.888502000  | -2.547822000 | 0.026754000  |
| C | 0.899683000  | -0.889397000 | 0.608803000  |
| O | 0.558761000  | -2.031336000 | 0.772172000  |
| N | 0.029409000  | 0.212649000  | 0.582624000  |
| H | 0.361835000  | 1.059594000  | -0.256924000 |
| N | -1.266238000 | -0.111219000 | 0.478950000  |
| C | -2.062185000 | 0.911068000  | 0.393834000  |
| C | -3.490053000 | 0.730652000  | 0.254586000  |

|   |              |              |              |
|---|--------------|--------------|--------------|
| C | -4.318645000 | 1.855036000  | 0.195970000  |
| C | -5.691073000 | 1.707489000  | 0.069290000  |
| C | -6.252215000 | 0.435574000  | -0.007577000 |
| C | -5.425459000 | -0.706560000 | 0.054979000  |
| C | -4.061786000 | -0.551640000 | 0.180799000  |
| H | -3.884793000 | 2.847159000  | 0.247023000  |
| H | -6.335078000 | 2.579281000  | 0.017310000  |
| H | -3.431378000 | -1.432304000 | 0.215058000  |
| O | -5.962312000 | -1.950297000 | -0.072994000 |
| O | -7.578726000 | 0.224134000  | -0.154247000 |
| H | -8.043529000 | 1.063670000  | -0.218970000 |
| C | -6.703433000 | -2.396554000 | 1.061347000  |
| H | -7.554998000 | -1.741549000 | 1.253968000  |
| H | -7.057263000 | -3.396180000 | 0.819175000  |
| H | -6.054327000 | -2.439060000 | 1.940662000  |
| N | 5.531041000  | -2.305709000 | -0.353839000 |
| O | 5.072453000  | -3.413661000 | -0.507638000 |
| O | 6.698117000  | -2.004950000 | -0.457923000 |
| N | 4.656345000  | 2.428259000  | 0.668408000  |
| O | 5.825394000  | 2.635410000  | 0.438535000  |
| O | 3.855539000  | 3.252749000  | 1.045002000  |
| H | -1.672404000 | 1.929848000  | 0.433251000  |
| C | -0.759338000 | 0.337543000  | -2.764270000 |
| H | -1.755307000 | 0.335178000  | -3.205196000 |
| H | -0.597840000 | -0.573748000 | -2.181080000 |
| H | 0.008732000  | 0.441631000  | -3.531806000 |
| O | 0.513508000  | 1.566099000  | -1.340447000 |
| O | -0.726473000 | 1.469097000  | -1.902150000 |

Zero-point correction=  
(Hartree/Particle)

0.313752

|                                              |              |
|----------------------------------------------|--------------|
| Thermal correction to Energy=                | 0.341249     |
| Thermal correction to Enthalpy=              | 0.342193     |
| Thermal correction to Gibbs Free Energy=     | 0.249897     |
| Sum of electronic and zero-point Energies=   | -1513.869137 |
| Sum of electronic and thermal Energies=      | -1513.841639 |
| Sum of electronic and thermal Enthalpies=    | -1513.840695 |
| Sum of electronic and thermal Free Energies= | -1513.932991 |

### TS-2-O2'-H +CH<sub>3</sub>OO•

|   |              |              |              |
|---|--------------|--------------|--------------|
| C | 6.228973000  | 0.445548000  | 0.218649000  |
| C | 5.201232000  | 1.331460000  | 0.481717000  |
| C | 3.877110000  | 0.937310000  | 0.606744000  |
| C | 3.562713000  | -0.410086000 | 0.457642000  |
| C | 4.573724000  | -1.338120000 | 0.211252000  |
| C | 5.875204000  | -0.887699000 | 0.087636000  |
| H | 7.255054000  | 0.774371000  | 0.125904000  |
| H | 3.133116000  | 1.686146000  | 0.847895000  |
| H | 4.338155000  | -2.391558000 | 0.126157000  |
| C | 2.165518000  | -0.955834000 | 0.610094000  |
| O | 1.970430000  | -2.084606000 | 0.981239000  |
| N | 1.172223000  | -0.063125000 | 0.281466000  |
| H | 1.403244000  | 0.796929000  | -0.207328000 |
| N | -0.128605000 | -0.421175000 | 0.408626000  |
| C | -0.988054000 | 0.413719000  | -0.059312000 |
| C | -2.402061000 | 0.152835000  | 0.034119000  |
| C | -3.306954000 | 1.014976000  | -0.668800000 |
| C | -4.689316000 | 0.832932000  | -0.535596000 |
| C | -5.213911000 | -0.200731000 | 0.243617000  |
| C | -4.287487000 | -1.076795000 | 0.909171000  |
| C | -2.934021000 | -0.900412000 | 0.797665000  |
| H | -5.312774000 | 1.526681000  | -1.079495000 |

|   |              |              |              |
|---|--------------|--------------|--------------|
| H | -2.251222000 | -1.564405000 | 1.314775000  |
| N | 6.949387000  | -1.872783000 | -0.190753000 |
| O | 6.618245000  | -3.027787000 | -0.319248000 |
| O | 8.078627000  | -1.447578000 | -0.270883000 |
| N | 5.531134000  | 2.766929000  | 0.649313000  |
| O | 6.693543000  | 3.081721000  | 0.553663000  |
| O | 4.610593000  | 3.521900000  | 0.867610000  |
| H | -0.682522000 | 1.341387000  | -0.549594000 |
| O | -2.824816000 | 1.950153000  | -1.445834000 |
| H | -2.269741000 | 1.434042000  | -2.318888000 |
| H | -4.653226000 | -1.892552000 | 1.515561000  |
| N | -6.560524000 | -0.416618000 | 0.356159000  |
| C | -7.100543000 | -1.363268000 | 1.328233000  |
| C | -6.989090000 | -0.894658000 | 2.779615000  |
| H | -6.615908000 | -2.334492000 | 1.199989000  |
| H | -8.149585000 | -1.515417000 | 1.071350000  |
| H | -7.376921000 | -1.661012000 | 3.454240000  |
| H | -5.951363000 | -0.692091000 | 3.050247000  |
| H | -7.561245000 | 0.020824000  | 2.935790000  |
| C | -7.502301000 | 0.455041000  | -0.336999000 |
| C | -7.766896000 | 1.778015000  | 0.383041000  |
| H | -8.435041000 | -0.100070000 | -0.450988000 |
| H | -7.128749000 | 0.634227000  | -1.347124000 |
| H | -8.404932000 | 2.419992000  | -0.227965000 |
| H | -8.271699000 | 1.607152000  | 1.335407000  |
| H | -6.833467000 | 2.307488000  | 0.581361000  |
| C | -1.498924000 | -1.597986000 | -2.637742000 |
| H | -2.088673000 | -2.439507000 | -2.276870000 |
| H | -0.691482000 | -1.368703000 | -1.939311000 |
| H | -1.093270000 | -1.805112000 | -3.630014000 |
| O | -1.734270000 | 0.621105000  | -3.085268000 |
| O | -2.403922000 | -0.509206000 | -2.722437000 |

Zero-point correction=  
(Hartree/Particle)

0.412096

|                                              |              |
|----------------------------------------------|--------------|
| Thermal correction to Energy=                | 0.443700     |
| Thermal correction to Enthalpy=              | 0.444645     |
| Thermal correction to Gibbs Free Energy=     | 0.342236     |
| Sum of electronic and zero-point Energies=   | -1611.824056 |
| Sum of electronic and thermal Energies=      | -1611.792452 |
| Sum of electronic and thermal Enthalpies=    | -1611.791508 |
| Sum of electronic and thermal Free Energies= | -1611.893917 |

### TS-2-N8-H +CH<sub>3</sub>OO•

|   |              |              |              |
|---|--------------|--------------|--------------|
| C | -5.937984000 | 0.160875000  | -0.202213000 |
| C | -4.953405000 | 1.097626000  | -0.459309000 |
| C | -3.614326000 | 0.770175000  | -0.602382000 |
| C | -3.238956000 | -0.567007000 | -0.488093000 |
| C | -4.203089000 | -1.543295000 | -0.247280000 |
| C | -5.523934000 | -1.156728000 | -0.103460000 |
| H | -6.975559000 | 0.442535000  | -0.088314000 |
| H | -2.898884000 | 1.555106000  | -0.811080000 |
| H | -3.916612000 | -2.584953000 | -0.176636000 |
| C | -1.813725000 | -1.035265000 | -0.627978000 |
| O | -1.551069000 | -2.191032000 | -0.844687000 |
| N | -0.878509000 | -0.003534000 | -0.523809000 |
| H | -1.181523000 | 0.831124000  | 0.278854000  |
| N | 0.395641000  | -0.405144000 | -0.409930000 |
| C | 1.248775000  | 0.572720000  | -0.291637000 |
| C | 2.647750000  | 0.297569000  | -0.142560000 |
| C | 3.579547000  | 1.350319000  | -0.056938000 |
| C | 4.935549000  | 1.107787000  | 0.083286000  |

|   |              |              |              |
|---|--------------|--------------|--------------|
| C | 5.433894000  | -0.211614000 | 0.158319000  |
| C | 4.493523000  | -1.275904000 | 0.057893000  |
| C | 3.154731000  | -1.014568000 | -0.080983000 |
| H | 5.603694000  | 1.958140000  | 0.118787000  |
| H | 2.445273000  | -1.830895000 | -0.148355000 |
| N | -6.547648000 | -2.194059000 | 0.165675000  |
| O | -6.164674000 | -3.336391000 | 0.268898000  |
| O | -7.696049000 | -1.825602000 | 0.264433000  |
| N | -5.355517000 | 2.517260000  | -0.596275000 |
| O | -6.508415000 | 2.791068000  | -0.351714000 |
| O | -4.504682000 | 3.303150000  | -0.943970000 |
| H | 0.919184000  | 1.610787000  | -0.304151000 |
| O | 3.090608000  | 2.611171000  | -0.133028000 |
| H | 3.797709000  | 3.253059000  | -0.025347000 |
| H | 4.821033000  | -2.303825000 | 0.095411000  |
| N | 6.765442000  | -0.459270000 | 0.336870000  |
| C | 7.290304000  | -1.820565000 | 0.258204000  |
| C | 7.359138000  | -2.375991000 | -1.164626000 |
| H | 6.690503000  | -2.472479000 | 0.897630000  |
| H | 8.289047000  | -1.802335000 | 0.696311000  |
| H | 6.380045000  | -2.349411000 | -1.645428000 |
| H | 8.050954000  | -1.794221000 | -1.775324000 |
| H | 7.706358000  | -3.411202000 | -1.147999000 |
| C | 7.725496000  | 0.634875000  | 0.421742000  |
| C | 8.128619000  | 1.212639000  | -0.935917000 |
| H | 8.607674000  | 0.252692000  | 0.937629000  |
| H | 7.314039000  | 1.413698000  | 1.067825000  |
| H | 8.777272000  | 2.080948000  | -0.801461000 |
| H | 8.672206000  | 0.472581000  | -1.524991000 |
| H | 7.251318000  | 1.519579000  | -1.508307000 |
| C | -0.270488000 | -0.020326000 | 2.837598000  |
| H | 0.699691000  | -0.134691000 | 3.319955000  |
| H | -0.491806000 | -0.893531000 | 2.216425000  |
| H | -1.059014000 | 0.129114000  | 3.577164000  |
| O | -1.357559000 | 1.359764000  | 1.404330000  |
| O | -0.159033000 | 1.134306000  | 2.018451000  |

Zero-point correction=  
(Hartree/Particle)

0.412289

|                                              |              |
|----------------------------------------------|--------------|
| Thermal correction to Energy=                | 0.444085     |
| Thermal correction to Enthalpy=              | 0.445029     |
| Thermal correction to Gibbs Free Energy=     | 0.342212     |
| Sum of electronic and zero-point Energies=   | -1611.824759 |
| Sum of electronic and thermal Energies=      | -1611.792963 |
| Sum of electronic and thermal Enthalpies=    | -1611.792019 |
| Sum of electronic and thermal Free Energies= | -1611.894836 |

### TS-2-C7'-H +CH<sub>3</sub>OO•

|   |              |              |              |
|---|--------------|--------------|--------------|
| C | -6.891409000 | 0.574724000  | 0.016285000  |
| C | -5.800606000 | 1.398131000  | -0.189027000 |
| C | -4.504325000 | 0.918940000  | -0.311178000 |
| C | -4.284058000 | -0.451666000 | -0.217018000 |
| C | -5.361012000 | -1.317233000 | -0.029498000 |
| C | -6.631237000 | -0.784072000 | 0.092755000  |
| H | -7.894360000 | 0.968688000  | 0.106640000  |
| H | -3.706598000 | 1.624241000  | -0.506960000 |
| H | -5.198478000 | -2.387041000 | 0.011227000  |
| C | -2.922550000 | -1.086198000 | -0.371540000 |
| O | -2.804795000 | -2.208231000 | -0.794508000 |
| N | -1.883259000 | -0.280491000 | 0.013199000  |
| H | -2.067798000 | 0.579701000  | 0.519233000  |
| N | -0.598777000 | -0.718467000 | -0.104511000 |

|   |              |              |              |
|---|--------------|--------------|--------------|
| C | 0.300458000  | 0.042376000  | 0.384924000  |
| C | 1.712540000  | -0.319512000 | 0.310209000  |
| C | 2.683864000  | 0.540734000  | 0.831376000  |
| C | 4.036180000  | 0.220561000  | 0.774166000  |
| C | 4.448158000  | -0.975350000 | 0.184141000  |
| C | 3.479316000  | -1.847289000 | -0.345417000 |
| C | 2.142489000  | -1.516195000 | -0.276437000 |
| H | 4.766663000  | 0.935703000  | 1.135421000  |
| H | 1.389960000  | -2.191335000 | -0.666236000 |
| N | -7.775395000 | -1.703777000 | 0.308668000  |
| O | -7.527461000 | -2.883686000 | 0.388312000  |
| O | -8.874418000 | -1.205335000 | 0.391786000  |
| N | -6.028098000 | 2.858797000  | -0.293880000 |
| O | -7.168681000 | 3.248876000  | -0.211856000 |
| O | -5.052964000 | 3.559131000  | -0.450515000 |
| H | 0.053638000  | 0.988936000  | 0.874466000  |
| O | 2.261861000  | 1.712438000  | 1.379955000  |
| H | 3.021955000  | 2.241372000  | 1.640461000  |
| H | 3.771866000  | -2.798862000 | -0.767966000 |
| N | 5.812617000  | -1.319145000 | 0.144056000  |
| C | 6.360472000  | -1.803013000 | -1.124163000 |
| C | 6.774029000  | -0.660162000 | -2.049256000 |
| H | 5.603918000  | -2.415119000 | -1.610316000 |
| H | 7.206099000  | -2.457548000 | -0.910012000 |
| H | 7.126833000  | -1.054121000 | -3.004638000 |
| H | 5.928036000  | 0.006591000  | -2.227187000 |
| H | 7.574528000  | -0.070986000 | -1.599180000 |
| C | 6.685263000  | -0.740441000 | 1.093770000  |
| C | 8.088149000  | -1.308835000 | 1.154687000  |
| H | 6.199057000  | -0.731268000 | 2.073174000  |
| H | 6.818220000  | 0.493877000  | 0.917097000  |
| H | 8.627599000  | -0.820019000 | 1.966223000  |
| H | 8.073196000  | -2.385075000 | 1.351720000  |
| H | 8.646995000  | -1.132599000 | 0.233665000  |
| C | 7.826049000  | 2.595064000  | -0.975342000 |
| H | 7.610828000  | 2.801092000  | -2.024391000 |
| H | 8.581401000  | 1.808116000  | -0.890824000 |
| H | 8.182971000  | 3.498248000  | -0.475721000 |
| O | 6.832133000  | 1.826439000  | 0.910040000  |
| O | 6.602229000  | 2.169821000  | -0.405619000 |

Zero-point correction=  
(Hartree/Particle)

0.411759

|                                              |              |
|----------------------------------------------|--------------|
| Thermal correction to Energy=                | 0.443588     |
| Thermal correction to Enthalpy=              | 0.444532     |
| Thermal correction to Gibbs Free Energy=     | 0.341493     |
| Sum of electronic and zero-point Energies=   | -1611.817943 |
| Sum of electronic and thermal Energies=      | -1611.786114 |
| Sum of electronic and thermal Enthalpies=    | -1611.785169 |
| Sum of electronic and thermal Free Energies= | -1611.888208 |

### TS-3-N8-H +CH<sub>3</sub>OO•

|   |             |              |              |
|---|-------------|--------------|--------------|
| C | 3.195388000 | 1.232546000  | -0.344403000 |
| C | 1.876605000 | 0.868225000  | -0.565292000 |
| C | 1.542045000 | -0.483444000 | -0.517440000 |
| C | 2.524487000 | -1.438308000 | -0.262769000 |
| C | 3.822772000 | -1.015456000 | -0.041562000 |
| C | 4.196582000 | 0.317755000  | -0.073268000 |
| H | 1.145858000 | 1.636018000  | -0.784045000 |
| H | 2.271098000 | -2.490765000 | -0.241481000 |
| H | 5.217977000 | 0.627165000  | 0.101025000  |
| N | 3.554055000 | 2.669535000  | -0.407095000 |

|   |              |              |              |
|---|--------------|--------------|--------------|
| O | 4.692480000  | 2.966708000  | -0.128211000 |
| O | 2.683127000  | 3.442961000  | -0.732689000 |
| N | 4.866428000  | -2.029678000 | 0.242689000  |
| O | 5.995609000  | -1.628494000 | 0.406852000  |
| O | 4.514632000  | -3.185268000 | 0.291275000  |
| C | 0.143149000  | -0.985927000 | -0.745790000 |
| O | -0.082741000 | -2.136584000 | -1.012144000 |
| N | -0.832638000 | 0.023797000  | -0.654451000 |
| H | -0.607405000 | 0.814647000  | 0.291498000  |
| N | -2.090199000 | -0.433511000 | -0.626877000 |
| C | -2.987148000 | 0.486165000  | -0.446419000 |
| H | -2.703557000 | 1.535535000  | -0.348137000 |
| C | -4.834466000 | -1.181543000 | -0.506545000 |
| C | -4.397366000 | 0.145958000  | -0.378290000 |
| C | -5.332141000 | 1.169117000  | -0.182072000 |
| C | -6.687305000 | 0.874488000  | -0.119502000 |
| C | -7.114938000 | -0.443079000 | -0.252558000 |
| C | -6.187570000 | -1.468229000 | -0.446596000 |
| H | -4.099593000 | -1.963545000 | -0.654484000 |
| H | -4.989046000 | 2.192899000  | -0.077952000 |
| H | -7.408297000 | 1.668155000  | 0.032358000  |
| H | -8.172355000 | -0.674653000 | -0.204288000 |
| H | -6.527208000 | -2.491637000 | -0.549198000 |
| C | -1.693364000 | -0.298858000 | 2.662738000  |
| H | -2.689097000 | -0.446190000 | 3.078695000  |
| H | -0.948022000 | -0.205398000 | 3.453527000  |
| H | -1.435554000 | -1.119958000 | 1.987250000  |
| O | -0.531744000 | 1.200460000  | 1.414497000  |
| O | -1.763702000 | 0.919001000  | 1.929667000  |

Zero-point correction=  
(Hartree/Particle)

0.276647

|                                              |              |
|----------------------------------------------|--------------|
| Thermal correction to Energy=                | 0.300235     |
| Thermal correction to Enthalpy=              | 0.301179     |
| Thermal correction to Gibbs Free Energy=     | 0.217581     |
| Sum of electronic and zero-point Energies=   | -1324.173063 |
| Sum of electronic and thermal Energies=      | -1324.149475 |
| Sum of electronic and thermal Enthalpies=    | -1324.148531 |
| Sum of electronic and thermal Free Energies= | -1324.232129 |

### TS-4-N8-H +CH<sub>3</sub>OO•

|   |              |              |              |
|---|--------------|--------------|--------------|
| C | -5.112383000 | 0.556736000  | -0.120486000 |
| C | -4.024686000 | 1.348529000  | -0.441152000 |
| C | -2.741932000 | 0.847082000  | -0.593518000 |
| C | -2.536718000 | -0.520097000 | -0.419252000 |
| C | -3.608917000 | -1.355136000 | -0.110679000 |
| C | -4.865982000 | -0.797013000 | 0.036422000  |
| H | -6.103552000 | 0.972555000  | -0.001893000 |
| H | -1.939829000 | 1.524689000  | -0.856451000 |
| H | -3.455172000 | -2.420201000 | 0.009342000  |
| C | -1.187639000 | -1.164432000 | -0.561399000 |
| O | -1.056410000 | -2.355262000 | -0.687555000 |
| N | -0.124285000 | -0.251400000 | -0.566960000 |
| H | -0.258725000 | 0.664733000  | 0.215075000  |
| N | 1.077617000  | -0.831000000 | -0.471792000 |
| C | 2.102913000  | -0.021267000 | -0.457315000 |
| C | 3.432996000  | -0.532741000 | -0.342143000 |
| C | 4.558058000  | 0.367473000  | -0.205009000 |
| C | 5.871464000  | -0.166322000 | -0.189698000 |
| C | 6.049190000  | -1.579256000 | -0.276107000 |
| C | 4.991485000  | -2.429013000 | -0.359850000 |
| C | 3.665496000  | -1.922992000 | -0.389757000 |

|   |              |              |              |
|---|--------------|--------------|--------------|
| H | 1.933799000  | 1.047973000  | -0.550582000 |
| C | 5.515640000  | 2.583820000  | 0.060669000  |
| C | 4.414305000  | 1.766921000  | -0.056874000 |
| C | 6.985160000  | 0.692907000  | -0.070724000 |
| C | 6.816596000  | 2.050452000  | 0.046034000  |
| H | 5.374641000  | 3.652004000  | 0.174496000  |
| H | 3.432585000  | 2.218936000  | -0.010065000 |
| H | 7.978499000  | 0.257329000  | -0.067954000 |
| H | 7.673772000  | 2.705622000  | 0.137634000  |
| H | 5.115530000  | -3.502857000 | -0.416077000 |
| H | 7.060135000  | -1.972792000 | -0.264439000 |
| O | 2.707685000  | -2.831549000 | -0.484452000 |
| H | 1.822699000  | -2.391546000 | -0.490365000 |
| N | -6.006081000 | -1.682418000 | 0.375976000  |
| O | -7.094259000 | -1.164853000 | 0.480414000  |
| O | -5.766734000 | -2.857842000 | 0.525264000  |
| N | -4.246117000 | 2.800964000  | -0.638376000 |
| O | -3.304502000 | 3.456555000  | -1.020568000 |
| O | -5.353085000 | 3.226957000  | -0.403396000 |
| C | 0.883177000  | 0.085935000  | 2.820150000  |
| H | 1.900517000  | -0.036548000 | 3.189559000  |
| H | 0.506670000  | -0.854846000 | 2.409537000  |
| H | 0.222139000  | 0.448130000  | 3.608674000  |
| O | -0.277919000 | 1.287200000  | 1.280218000  |
| O | 0.967600000  | 1.059329000  | 1.785787000  |

Zero-point correction=  
(Hartree/Particle)

0.328740

|                                              |              |
|----------------------------------------------|--------------|
| Thermal correction to Energy=                | 0.355881     |
| Thermal correction to Enthalpy=              | 0.356825     |
| Thermal correction to Gibbs Free Energy=     | 0.265138     |
| Sum of electronic and zero-point Energies=   | -1552.975937 |
| Sum of electronic and thermal Energies=      | -1552.948796 |
| Sum of electronic and thermal Enthalpies=    | -1552.947852 |
| Sum of electronic and thermal Free Energies= | -1553.039538 |

### TS-5-N8-H +CH<sub>3</sub>OO•

|   |              |              |              |
|---|--------------|--------------|--------------|
| C | -3.311299000 | 0.953554000  | -0.689592000 |
| C | -1.980247000 | 0.607123000  | -0.864577000 |
| C | -1.589875000 | -0.696740000 | -0.569942000 |
| C | -2.532463000 | -1.635902000 | -0.153910000 |
| C | -3.846216000 | -1.231976000 | 0.005015000  |
| C | -4.271291000 | 0.063876000  | -0.244459000 |
| H | -1.276530000 | 1.349761000  | -1.214680000 |
| H | -2.237094000 | -2.658165000 | 0.047625000  |
| H | -5.301146000 | 0.361626000  | -0.101814000 |
| N | -4.847587000 | -2.219895000 | 0.472729000  |
| O | -5.987863000 | -1.834364000 | 0.594513000  |
| O | -4.453903000 | -3.339748000 | 0.700940000  |
| N | -3.718002000 | 2.350801000  | -0.963141000 |
| O | -4.823796000 | 2.684099000  | -0.600215000 |
| O | -2.914364000 | 3.062386000  | -1.518686000 |
| C | -0.162657000 | -1.148962000 | -0.690378000 |
| O | 0.127741000  | -2.284426000 | -0.957552000 |
| N | 0.749970000  | -0.103781000 | -0.477438000 |
| N | 2.030232000  | -0.484411000 | -0.440520000 |
| C | 2.868634000  | 0.438369000  | -0.084771000 |
| H | 2.518583000  | 1.432406000  | 0.204541000  |
| C | 6.534801000  | 0.983389000  | 0.350677000  |
| C | 7.037507000  | -0.274607000 | 0.013991000  |
| C | 6.170089000  | -1.312763000 | -0.349918000 |
| C | 4.811746000  | -1.090778000 | -0.377072000 |

|   |              |              |              |
|---|--------------|--------------|--------------|
| C | 4.287535000  | 0.173821000  | -0.045813000 |
| C | 5.167890000  | 1.199764000  | 0.319772000  |
| H | 7.212526000  | 1.781528000  | 0.634467000  |
| H | 6.593566000  | -2.277283000 | -0.599636000 |
| H | 4.125827000  | -1.883673000 | -0.649699000 |
| H | 0.432895000  | 0.693030000  | 0.398024000  |
| H | 4.772918000  | 2.175502000  | 0.581235000  |
| O | 8.357989000  | -0.556059000 | 0.024031000  |
| H | 8.864794000  | 0.216655000  | 0.290455000  |
| C | -1.859269000 | 1.466142000  | 2.317109000  |
| H | -2.724782000 | 2.119986000  | 2.206454000  |
| H | -1.460457000 | 1.525776000  | 3.330903000  |
| H | -2.123052000 | 0.431128000  | 2.078433000  |
| O | 0.234706000  | 1.189921000  | 1.494797000  |
| O | -0.896716000 | 1.949049000  | 1.391608000  |

Zero-point correction=  
(Hartree/Particle)

0.280594

|                                              |              |
|----------------------------------------------|--------------|
| Thermal correction to Energy=                | 0.305476     |
| Thermal correction to Enthalpy=              | 0.306420     |
| Thermal correction to Gibbs Free Energy=     | 0.220777     |
| Sum of electronic and zero-point Energies=   | -1399.392633 |
| Sum of electronic and thermal Energies=      | -1399.367751 |
| Sum of electronic and thermal Enthalpies=    | -1399.366807 |
| Sum of electronic and thermal Free Energies= | -1399.452450 |

### TS-5-O4'-H +CH<sub>3</sub>OO•

|   |              |              |              |
|---|--------------|--------------|--------------|
| C | -4.536136000 | 1.246989000  | 0.111038000  |
| C | -3.210446000 | 0.975585000  | -0.193784000 |
| C | -2.806465000 | -0.351194000 | -0.304900000 |
| C | -3.734425000 | -1.378271000 | -0.135708000 |
| C | -5.041632000 | -1.049628000 | 0.172821000  |
| C | -5.481663000 | 0.257716000  | 0.304365000  |
| H | -2.539047000 | 1.807050000  | -0.367146000 |
| H | -3.432310000 | -2.411699000 | -0.251749000 |
| H | -6.511241000 | 0.490868000  | 0.539738000  |
| N | -6.026226000 | -2.142680000 | 0.369873000  |
| O | -7.163771000 | -1.818699000 | 0.620963000  |
| O | -5.619032000 | -3.275438000 | 0.267193000  |
| N | -4.958783000 | 2.663018000  | 0.227424000  |
| O | -6.125597000 | 2.874762000  | 0.455190000  |
| O | -4.101068000 | 3.506549000  | 0.089679000  |
| C | -1.400911000 | -0.761186000 | -0.664523000 |
| O | -1.173871000 | -1.797309000 | -1.230670000 |
| N | -0.433599000 | 0.141856000  | -0.279908000 |
| N | 0.864927000  | -0.095792000 | -0.579420000 |
| C | 1.727410000  | 0.713252000  | -0.098019000 |
| H | 1.433024000  | 1.557939000  | 0.535958000  |
| C | 5.415556000  | 1.326835000  | -0.060847000 |
| C | 5.893784000  | 0.270350000  | -0.877850000 |
| C | 4.959195000  | -0.651621000 | -1.424747000 |
| C | 3.616859000  | -0.506263000 | -1.186732000 |
| C | 3.149465000  | 0.549544000  | -0.372496000 |
| C | 4.062061000  | 1.453893000  | 0.182832000  |
| H | 6.135530000  | 2.014767000  | 0.364582000  |
| H | 5.345602000  | -1.452728000 | -2.043223000 |
| H | 2.895598000  | -1.195266000 | -1.609500000 |
| H | -0.670716000 | 0.904672000  | 0.346584000  |
| H | 3.701365000  | 2.261759000  | 0.810632000  |
| O | 7.162529000  | 0.135517000  | -1.136258000 |
| H | 7.768939000  | 0.113612000  | -0.138415000 |
| C | 6.641027000  | -1.572244000 | 1.882144000  |



|   |             |              |             |
|---|-------------|--------------|-------------|
| H | 5.677654000 | -1.575571000 | 2.390287000 |
| H | 7.410935000 | -2.036189000 | 2.500791000 |
| H | 6.573918000 | -2.081399000 | 0.918420000 |
| O | 8.128388000 | -0.112913000 | 0.985898000 |
| O | 6.962977000 | -0.200614000 | 1.677467000 |

Zero-point correction=  
(Hartree/Particle)

0.280478

|                                              |              |
|----------------------------------------------|--------------|
| Thermal correction to Energy=                | 0.305337     |
| Thermal correction to Enthalpy=              | 0.306281     |
| Thermal correction to Gibbs Free Energy=     | 0.218940     |
| Sum of electronic and zero-point Energies=   | -1399.394843 |
| Sum of electronic and thermal Energies=      | -1399.369984 |
| Sum of electronic and thermal Enthalpies=    | -1399.369040 |
| Sum of electronic and thermal Free Energies= | -1399.456381 |

### TS-6-N8-H +CH<sub>3</sub>OO•

|   |              |              |              |
|---|--------------|--------------|--------------|
| C | -4.256596000 | 1.153392000  | -0.386677000 |
| C | -2.923722000 | 0.825684000  | -0.578094000 |
| C | -2.547960000 | -0.513713000 | -0.497163000 |
| C | -3.505836000 | -1.492216000 | -0.240546000 |
| C | -4.820424000 | -1.105497000 | -0.048452000 |
| C | -5.234454000 | 0.214273000  | -0.113178000 |
| H | -2.213853000 | 1.612576000  | -0.797816000 |
| H | -3.219995000 | -2.535485000 | -0.195212000 |
| H | -6.267286000 | 0.495776000  | 0.038443000  |
| N | -5.837341000 | -2.145331000 | 0.237290000  |
| O | -6.980948000 | -1.776300000 | 0.378638000  |
| O | -5.453358000 | -3.289574000 | 0.310277000  |
| N | -4.658981000 | 2.576083000  | -0.487306000 |
| O | -5.803866000 | 2.847545000  | -0.206265000 |
| O | -3.815763000 | 3.366246000  | -0.844055000 |
| C | -1.129308000 | -0.980985000 | -0.691208000 |
| O | -0.873663000 | -2.132336000 | -0.934771000 |
| N | -0.188789000 | 0.049760000  | -0.600746000 |
| N | 1.087155000  | -0.355273000 | -0.542029000 |
| C | 1.947607000  | 0.612373000  | -0.414073000 |
| H | 1.614225000  | 1.651177000  | -0.369511000 |
| C | 5.620953000  | 1.197350000  | -0.126725000 |
| C | 6.145669000  | -0.116718000 | -0.188525000 |
| C | 5.227344000  | -1.192341000 | -0.320680000 |
| C | 3.874382000  | -0.961530000 | -0.387699000 |
| C | 3.356733000  | 0.346688000  | -0.331851000 |
| C | 4.261298000  | 1.410979000  | -0.197286000 |
| H | 6.281128000  | 2.046478000  | -0.023645000 |
| H | 5.586428000  | -2.210562000 | -0.368870000 |
| H | 3.182818000  | -1.789744000 | -0.488103000 |
| H | -0.460900000 | 0.871096000  | 0.232420000  |
| H | 3.880688000  | 2.425878000  | -0.146579000 |
| N | 7.487535000  | -0.343891000 | -0.121466000 |
| C | 8.003224000  | -1.699682000 | -0.195588000 |
| C | 8.407456000  | 0.770818000  | 0.017141000  |
| H | 7.629203000  | -2.313893000 | 0.629430000  |
| H | 7.727574000  | -2.179183000 | -1.139883000 |
| H | 9.088167000  | -1.670039000 | -0.133005000 |
| H | 9.424535000  | 0.389065000  | 0.057915000  |
| H | 8.332456000  | 1.457047000  | -0.832364000 |
| H | 8.215373000  | 1.332550000  | 0.936649000  |
| C | 0.517460000  | -0.032351000 | 2.746461000  |
| H | 1.497228000  | -0.160932000 | 3.205050000  |
| H | 0.276296000  | -0.893742000 | 2.116155000  |
| H | -0.253441000 | 0.110918000  | 3.505375000  |

|                                              |              |             |              |          |
|----------------------------------------------|--------------|-------------|--------------|----------|
| O                                            | -0.592930000 | 1.383813000 | 1.365250000  |          |
| O                                            | 0.619196000  | 1.134659000 | 1.943203000  |          |
| Zero-point correction=                       |              |             |              | 0.350484 |
| (Hartree/Particle)                           |              |             |              |          |
| Thermal correction to Energy=                |              |             | 0.378584     |          |
| Thermal correction to Enthalpy=              |              |             | 0.379528     |          |
| Thermal correction to Gibbs Free Energy=     |              |             | 0.285318     |          |
| Sum of electronic and zero-point Energies=   |              |             | -1458.049919 |          |
| Sum of electronic and thermal Energies=      |              |             | -1458.021820 |          |
| Sum of electronic and thermal Enthalpies=    |              |             | -1458.020876 |          |
| Sum of electronic and thermal Free Energies= |              |             | -1458.115086 |          |

**TS-BHA(O-H)+CH<sub>3</sub>OO•**

|                                              |              |              |              |          |
|----------------------------------------------|--------------|--------------|--------------|----------|
| C                                            | -1.326516000 | -1.962613000 | -0.302986000 |          |
| C                                            | -2.320898000 | -1.045901000 | 0.042304000  |          |
| C                                            | -2.022300000 | 0.325739000  | 0.139952000  |          |
| C                                            | -0.755793000 | 0.824825000  | -0.081529000 |          |
| C                                            | 0.261874000  | -0.115344000 | -0.450185000 |          |
| C                                            | -0.052893000 | -1.487858000 | -0.554154000 |          |
| H                                            | -1.532756000 | -3.020532000 | -0.386603000 |          |
| H                                            | -2.845057000 | 0.973863000  | 0.409834000  |          |
| H                                            | 0.743646000  | -2.165997000 | -0.835651000 |          |
| O                                            | 1.489397000  | 0.283111000  | -0.705222000 |          |
| H                                            | 2.198646000  | -0.453925000 | -0.277640000 |          |
| O                                            | -3.604154000 | -1.374258000 | 0.299910000  |          |
| C                                            | -3.969912000 | -2.739275000 | 0.227390000  |          |
| H                                            | -5.028039000 | -2.779534000 | 0.473339000  |          |
| H                                            | -3.812789000 | -3.133660000 | -0.780622000 |          |
| H                                            | -3.402910000 | -3.335104000 | 0.948330000  |          |
| C                                            | -0.435157000 | 2.313419000  | 0.050229000  |          |
| C                                            | 0.626383000  | 2.516277000  | 1.147654000  |          |
| C                                            | 0.083073000  | 2.856788000  | -1.294538000 |          |
| C                                            | -1.675528000 | 3.125891000  | 0.439143000  |          |
| H                                            | 0.260333000  | 2.141197000  | 2.107085000  |          |
| H                                            | 1.556276000  | 2.005316000  | 0.903739000  |          |
| H                                            | 0.834618000  | 3.584372000  | 1.257262000  |          |
| H                                            | 0.279621000  | 3.928587000  | -1.200776000 |          |
| H                                            | 1.002774000  | 2.359691000  | -1.598233000 |          |
| H                                            | -0.667215000 | 2.716800000  | -2.077472000 |          |
| H                                            | -2.464181000 | 3.048665000  | -0.313879000 |          |
| H                                            | -2.080599000 | 2.812590000  | 1.404877000  |          |
| H                                            | -1.397242000 | 4.178856000  | 0.521719000  |          |
| C                                            | 5.159957000  | -1.175048000 | 0.530403000  |          |
| H                                            | 6.032041000  | -1.395544000 | -0.083864000 |          |
| H                                            | 5.140266000  | -1.814421000 | 1.415258000  |          |
| H                                            | 5.154687000  | -0.124059000 | 0.827984000  |          |
| O                                            | 2.903312000  | -1.227433000 | 0.432500000  |          |
| O                                            | 4.035711000  | -1.449991000 | -0.286785000 |          |
| Zero-point correction=                       |              |              |              | 0.291585 |
| (Hartree/Particle)                           |              |              |              |          |
| Thermal correction to Energy=                |              |              | 0.309660     |          |
| Thermal correction to Enthalpy=              |              |              | 0.310604     |          |
| Thermal correction to Gibbs Free Energy=     |              |              | 0.242665     |          |
| Sum of electronic and zero-point Energies=   |              |              | -769.034940  |          |
| Sum of electronic and thermal Energies=      |              |              | -769.016866  |          |
| Sum of electronic and thermal Enthalpies=    |              |              | -769.015922  |          |
| Sum of electronic and thermal Free Energies= |              |              | -769.083860  |          |

**P-1-N8-H+HOO•**

|   |             |             |             |
|---|-------------|-------------|-------------|
| C | 4.913029000 | 0.020743000 | 0.280522000 |
| C | 3.872582000 | 0.919278000 | 0.438056000 |
| C | 2.542263000 | 0.567277000 | 0.285970000 |

|                                              |              |              |                             |
|----------------------------------------------|--------------|--------------|-----------------------------|
| C                                            | 2.233227000  | -0.745788000 | -0.059407000                |
| C                                            | 3.248457000  | -1.686563000 | -0.216070000                |
| C                                            | 4.560787000  | -1.279675000 | -0.043442000                |
| H                                            | 5.946640000  | 0.314387000  | 0.402919000                 |
| H                                            | 1.763608000  | 1.300791000  | 0.446766000                 |
| H                                            | 3.012593000  | -2.712488000 | -0.470694000                |
| C                                            | 0.807869000  | -1.179246000 | -0.256873000                |
| O                                            | 0.487680000  | -2.338299000 | -0.297310000                |
| N                                            | -0.056220000 | -0.074795000 | -0.444399000                |
| H                                            | 0.476228000  | 1.568446000  | -1.287101000                |
| N                                            | -1.309473000 | -0.369349000 | -0.276976000                |
| C                                            | -2.111862000 | 0.676720000  | -0.427713000                |
| C                                            | -3.524285000 | 0.534335000  | -0.307736000                |
| C                                            | -4.339094000 | 1.671670000  | -0.454126000                |
| C                                            | -5.711788000 | 1.564465000  | -0.351661000                |
| C                                            | -6.298341000 | 0.321530000  | -0.104335000                |
| C                                            | -5.491418000 | -0.830170000 | 0.055593000                 |
| C                                            | -4.125594000 | -0.717874000 | -0.048521000                |
| H                                            | -3.881506000 | 2.634446000  | -0.650464000                |
| H                                            | -6.343928000 | 2.438106000  | -0.471349000                |
| H                                            | -3.510567000 | -1.603085000 | 0.059980000                 |
| O                                            | -6.069100000 | -2.045122000 | 0.246652000                 |
| O                                            | -7.629176000 | 0.147411000  | -0.013637000                |
| H                                            | -8.088548000 | 0.979699000  | -0.163409000                |
| C                                            | -6.627408000 | -2.241877000 | 1.545333000                 |
| H                                            | -7.420853000 | -1.518933000 | 1.743291000                 |
| H                                            | -7.039583000 | -3.248257000 | 1.548854000                 |
| H                                            | -5.845529000 | -2.161323000 | 2.305748000                 |
| N                                            | 5.646999000  | -2.273825000 | -0.219142000                |
| O                                            | 5.321974000  | -3.399857000 | -0.514531000                |
| O                                            | 6.781265000  | -1.887286000 | -0.053210000                |
| N                                            | 4.195127000  | 2.324712000  | 0.769794000                 |
| O                                            | 5.345908000  | 2.589350000  | 1.015853000                 |
| O                                            | 3.279398000  | 3.123061000  | 0.771090000                 |
| H                                            | -1.684746000 | 1.662249000  | -0.623130000                |
| O                                            | 0.394236000  | 3.054298000  | -0.159346000                |
| H                                            | 1.259432000  | 3.428951000  | 0.059848000                 |
| O                                            | 0.629214000  | 2.519053000  | -1.460530000                |
| Zero-point correction=                       |              |              | 0.290396 (Hartree/Particle) |
| Thermal correction to Energy=                |              |              | 0.317283                    |
| Thermal correction to Enthalpy=              |              |              | 0.318228                    |
| Thermal correction to Gibbs Free Energy=     |              |              | 0.228081                    |
| Sum of electronic and zero-point Energies=   |              |              | -1474.623806                |
| Sum of electronic and thermal Energies=      |              |              | -1474.596919                |
| Sum of electronic and thermal Enthalpies=    |              |              | -1474.595975                |
| Sum of electronic and thermal Free Energies= |              |              | -1474.686121                |

### P-1-O4'-H +HOO•

|   |             |              |              |
|---|-------------|--------------|--------------|
| C | 5.960213000 | 0.125752000  | 0.004187000  |
| C | 5.044790000 | 1.129800000  | 0.256902000  |
| C | 3.678025000 | 0.904919000  | 0.329194000  |
| C | 3.200231000 | -0.387013000 | 0.132995000  |
| C | 4.092969000 | -1.431264000 | -0.106440000 |
| C | 5.444686000 | -1.148020000 | -0.174212000 |
| H | 7.022643000 | 0.322017000  | -0.046346000 |
| H | 3.028988000 | 1.737862000  | 0.568141000  |
| H | 3.729200000 | -2.443815000 | -0.229773000 |
| C | 1.740545000 | -0.751355000 | 0.223837000  |
| O | 1.384827000 | -1.851685000 | 0.549827000  |
| N | 0.880406000 | 0.276450000  | -0.106338000 |
| H | 1.241025000 | 1.120604000  | -0.540241000 |

|   |               |              |              |
|---|---------------|--------------|--------------|
| N | -0.454562000  | 0.086221000  | -0.027384000 |
| C | -1.201213000  | 1.034034000  | -0.449990000 |
| C | -2.652107000  | 0.929769000  | -0.397613000 |
| C | -3.429138000  | 2.024385000  | -0.883296000 |
| C | -4.784374000  | 1.970345000  | -0.855560000 |
| C | -5.495068000  | 0.814420000  | -0.344891000 |
| C | -4.664731000  | -0.291976000 | 0.165061000  |
| C | -3.276182000  | -0.199340000 | 0.113437000  |
| H | -2.922401000  | 2.899344000  | -1.276074000 |
| H | -5.404342000  | 2.780226000  | -1.219450000 |
| H | -2.687262000  | -1.028630000 | 0.486012000  |
| O | -5.146523000  | -1.410120000 | 0.679073000  |
| O | -6.736545000  | 0.777019000  | -0.350129000 |
| H | -8.390875000  | 0.045403000  | -0.614607000 |
| C | -6.546506000  | -1.661066000 | 0.887133000  |
| H | -7.068674000  | -1.751305000 | -0.063728000 |
| H | -6.572882000  | -2.606163000 | 1.422811000  |
| H | -7.002052000  | -0.870479000 | 1.478030000  |
| N | 6.394695000   | -2.255870000 | -0.445321000 |
| O | 5.923808000   | -3.355353000 | -0.614603000 |
| O | 7.570327000   | -1.975305000 | -0.478867000 |
| N | 5.545818000   | 2.508895000  | 0.467595000  |
| O | 6.741762000   | 2.672961000  | 0.439452000  |
| O | 4.717718000   | 3.373626000  | 0.648810000  |
| H | -0.779327000  | 1.956560000  | -0.864600000 |
| O | -9.406695000  | -0.806677000 | 0.710591000  |
| H | -10.215356000 | -0.319938000 | 0.905299000  |
| O | -9.200684000  | -0.490954000 | -0.662878000 |

Zero-point correction=  
(Hartree/Particle)

0.290180

|                                              |              |
|----------------------------------------------|--------------|
| Thermal correction to Energy=                | 0.317502     |
| Thermal correction to Enthalpy=              | 0.318447     |
| Thermal correction to Gibbs Free Energy=     | 0.225382     |
| Sum of electronic and zero-point Energies=   | -1474.629862 |
| Sum of electronic and thermal Energies=      | -1474.602539 |
| Sum of electronic and thermal Enthalpies=    | -1474.601595 |
| Sum of electronic and thermal Free Energies= | -1474.694660 |

### P-2-N8-H +HOO•

|   |              |              |              |
|---|--------------|--------------|--------------|
| C | 5.961036000  | -0.009917000 | -0.386214000 |
| C | 4.952465000  | -0.918226000 | -0.651712000 |
| C | 3.605903000  | -0.613785000 | -0.523285000 |
| C | 3.246916000  | 0.669426000  | -0.115632000 |
| C | 4.233709000  | 1.619494000  | 0.142509000  |
| C | 5.562096000  | 1.256238000  | 0.009611000  |
| H | 7.004880000  | -0.273341000 | -0.485458000 |
| H | 2.862822000  | -1.365575000 | -0.753250000 |
| H | 3.956947000  | 2.622857000  | 0.440550000  |
| C | 1.810309000  | 1.099274000  | 0.027731000  |
| O | 1.518015000  | 2.267923000  | 0.109842000  |
| N | 0.922037000  | 0.014086000  | 0.093480000  |
| H | 1.328349000  | -1.570856000 | 0.936944000  |
| N | -0.324335000 | 0.382654000  | 0.037496000  |
| C | -1.185877000 | -0.621992000 | 0.155327000  |
| C | -2.572157000 | -0.356597000 | 0.109913000  |
| C | -3.515171000 | -1.411573000 | 0.223711000  |
| C | -4.875096000 | -1.173617000 | 0.186891000  |
| C | -5.379441000 | 0.138500000  | 0.028532000  |
| C | -4.432119000 | 1.204283000  | -0.071905000 |
| C | -3.090690000 | 0.954630000  | -0.035039000 |
| H | -5.539686000 | -2.013999000 | 0.332137000  |

|   |              |              |              |
|---|--------------|--------------|--------------|
| H | -2.378305000 | 1.765641000  | -0.124180000 |
| N | 6.611940000  | 2.262794000  | 0.294679000  |
| O | 6.246338000  | 3.360398000  | 0.646664000  |
| O | 7.763312000  | 1.916245000  | 0.156693000  |
| N | 5.335036000  | -2.276468000 | -1.103886000 |
| O | 6.512355000  | -2.555942000 | -1.080607000 |
| O | 4.445331000  | -3.010092000 | -1.467509000 |
| H | -0.831656000 | -1.642289000 | 0.290623000  |
| O | -3.012730000 | -2.651402000 | 0.382991000  |
| H | -3.717807000 | -3.299946000 | 0.464052000  |
| H | -4.769830000 | 2.220704000  | -0.207517000 |
| N | -6.714771000 | 0.400101000  | -0.026767000 |
| C | -7.209753000 | 1.758595000  | 0.214773000  |
| C | -7.378152000 | 2.595144000  | -1.051801000 |
| H | -6.534398000 | 2.253434000  | 0.914572000  |
| H | -8.165638000 | 1.666545000  | 0.735237000  |
| H | -6.443632000 | 2.651486000  | -1.611942000 |
| H | -8.135896000 | 2.168569000  | -1.709073000 |
| H | -7.684366000 | 3.610073000  | -0.789544000 |
| C | -7.711954000 | -0.669489000 | -0.035415000 |
| C | -8.922234000 | -0.361184000 | -0.911329000 |
| H | -8.032060000 | -0.885444000 | 0.992695000  |
| H | -7.245010000 | -1.567444000 | -0.432542000 |
| H | -9.595515000 | -1.219844000 | -0.896915000 |
| H | -9.486781000 | 0.504126000  | -0.562368000 |
| H | -8.614297000 | -0.184997000 | -1.943316000 |
| O | 0.372612000  | -1.989589000 | 2.489337000  |
| H | 0.904550000  | -1.784811000 | 3.266365000  |
| O | 1.368424000  | -2.349077000 | 1.534827000  |

Zero-point correction=  
(Hartree/Particle)

0.388888

|                                              |              |
|----------------------------------------------|--------------|
| Thermal correction to Energy=                | 0.420306     |
| Thermal correction to Enthalpy=              | 0.421250     |
| Thermal correction to Gibbs Free Energy=     | 0.318978     |
| Sum of electronic and zero-point Energies=   | -1572.574241 |
| Sum of electronic and thermal Energies=      | -1572.542823 |
| Sum of electronic and thermal Enthalpies=    | -1572.541879 |
| Sum of electronic and thermal Free Energies= | -1572.644150 |

### P-2-O2'-H +HOO•

|   |              |              |              |
|---|--------------|--------------|--------------|
| C | 5.864319000  | 0.353088000  | 0.160120000  |
| C | 4.708742000  | 1.109964000  | 0.218401000  |
| C | 3.439133000  | 0.558481000  | 0.167491000  |
| C | 3.311893000  | -0.820681000 | 0.025017000  |
| C | 4.450746000  | -1.621826000 | -0.028135000 |
| C | 5.693952000  | -1.016737000 | 0.037659000  |
| H | 6.846756000  | 0.802542000  | 0.208369000  |
| H | 2.585636000  | 1.220258000  | 0.256564000  |
| H | 4.356943000  | -2.697270000 | -0.114828000 |
| C | 1.973888000  | -1.516934000 | -0.037838000 |
| O | 1.854583000  | -2.688839000 | 0.210360000  |
| N | 0.945924000  | -0.687694000 | -0.419093000 |
| H | 1.124172000  | 0.291838000  | -0.634329000 |
| N | -0.342002000 | -1.077414000 | -0.331585000 |
| C | -1.170954000 | -0.152558000 | -0.693089000 |
| C | -2.581204000 | -0.284756000 | -0.538263000 |
| C | -3.362319000 | 0.967736000  | -0.590930000 |
| C | -4.786867000 | 0.864367000  | -0.526288000 |
| C | -5.418790000 | -0.351138000 | -0.347643000 |
| C | -4.600995000 | -1.550833000 | -0.227482000 |
| C | -3.237867000 | -1.504849000 | -0.312356000 |

|   |              |              |              |
|---|--------------|--------------|--------------|
| H | -5.323570000 | 1.800909000  | -0.559704000 |
| H | -2.648518000 | -2.411405000 | -0.240910000 |
| N | 6.907404000  | -1.867493000 | -0.029502000 |
| O | 6.740764000  | -3.058180000 | -0.150398000 |
| O | 7.977454000  | -1.307531000 | 0.040742000  |
| N | 4.824993000  | 2.581659000  | 0.335607000  |
| O | 5.927175000  | 3.039532000  | 0.516538000  |
| O | 3.803065000  | 3.227504000  | 0.233608000  |
| H | -0.811835000 | 0.795170000  | -1.087441000 |
| O | -2.768251000 | 2.063286000  | -0.643786000 |
| H | -1.132762000 | 2.464272000  | 0.144409000  |
| H | -5.081088000 | -2.509922000 | -0.096406000 |
| N | -6.779953000 | -0.486025000 | -0.307317000 |
| C | -7.419139000 | -1.675044000 | 0.257687000  |
| C | -7.164677000 | -1.866894000 | 1.752865000  |
| H | -7.114387000 | -2.563496000 | -0.301600000 |
| H | -8.489592000 | -1.562897000 | 0.080466000  |
| H | -7.530500000 | -1.010724000 | 2.321129000  |
| H | -7.677959000 | -2.762600000 | 2.108923000  |
| H | -6.099586000 | -1.977496000 | 1.964440000  |
| C | -7.630049000 | 0.676577000  | -0.535699000 |
| C | -7.885910000 | 1.512845000  | 0.718757000  |
| H | -8.576619000 | 0.312523000  | -0.941075000 |
| H | -7.171742000 | 1.281980000  | -1.318923000 |
| H | -8.437440000 | 2.419755000  | 0.462798000  |
| H | -8.479139000 | 0.952864000  | 1.444335000  |
| H | -6.946366000 | 1.801219000  | 1.193668000  |
| O | 0.686401000  | 2.358747000  | -0.388580000 |
| H | 1.145847000  | 3.207530000  | -0.339844000 |
| O | -0.288216000 | 2.467837000  | 0.645459000  |

Zero-point correction=  
(Hartree/Particle)

0.389699

|                                              |              |
|----------------------------------------------|--------------|
| Thermal correction to Energy=                | 0.420451     |
| Thermal correction to Enthalpy=              | 0.421395     |
| Thermal correction to Gibbs Free Energy=     | 0.322868     |
| Sum of electronic and zero-point Energies=   | -1572.587609 |
| Sum of electronic and thermal Energies=      | -1572.556857 |
| Sum of electronic and thermal Enthalpies=    | -1572.555913 |
| Sum of electronic and thermal Free Energies= | -1572.654440 |

**P-2-C7'-H +HOO•**

|   |              |              |              |
|---|--------------|--------------|--------------|
| C | 6.575227000  | 0.509619000  | 0.010317000  |
| C | 5.498490000  | 1.317114000  | 0.324242000  |
| C | 4.197277000  | 0.843031000  | 0.408348000  |
| C | 3.956893000  | -0.504761000 | 0.160128000  |
| C | 5.019545000  | -1.356086000 | -0.140397000 |
| C | 6.295410000  | -0.828039000 | -0.218204000 |
| H | 7.582230000  | 0.899204000  | -0.048129000 |
| H | 3.411897000  | 1.530928000  | 0.694949000  |
| H | 4.841570000  | -2.412011000 | -0.301359000 |
| C | 2.588778000  | -1.136535000 | 0.259204000  |
| O | 2.461767000  | -2.298799000 | 0.551085000  |
| N | 1.556186000  | -0.279457000 | -0.014705000 |
| H | 1.746252000  | 0.631387000  | -0.419991000 |
| N | 0.266787000  | -0.712262000 | 0.069132000  |
| C | -0.627040000 | 0.113007000  | -0.315360000 |
| C | -2.042925000 | -0.232874000 | -0.263600000 |
| C | -3.006429000 | 0.694960000  | -0.670527000 |
| C | -4.360566000 | 0.387401000  | -0.631501000 |
| C | -4.794505000 | -0.849040000 | -0.153367000 |
| C | -3.833469000 | -1.790744000 | 0.259072000  |
| C | -2.491069000 | -1.478805000 | 0.194791000  |

|   |              |              |              |
|---|--------------|--------------|--------------|
| H | -5.064600000 | 1.146635000  | -0.939742000 |
| H | -1.747350000 | -2.206462000 | 0.497355000  |
| N | 7.424024000  | -1.730678000 | -0.554213000 |
| O | 7.159616000  | -2.891488000 | -0.760663000 |
| O | 8.528144000  | -1.238539000 | -0.599551000 |
| N | 5.747442000  | 2.753074000  | 0.593000000  |
| O | 6.892422000  | 3.135681000  | 0.542056000  |
| O | 4.783989000  | 3.443152000  | 0.840861000  |
| H | -0.371834000 | 1.107127000  | -0.694326000 |
| O | -2.586357000 | 1.918716000  | -1.089709000 |
| H | -3.349950000 | 2.494207000  | -1.209703000 |
| H | -4.130729000 | -2.774886000 | 0.592973000  |
| N | -6.171161000 | -1.146050000 | -0.101028000 |
| C | -6.674465000 | -1.820497000 | 1.100982000  |
| C | -6.859044000 | -0.840303000 | 2.257307000  |
| H | -5.974739000 | -2.604093000 | 1.381263000  |
| H | -7.612113000 | -2.314540000 | 0.848291000  |
| H | -7.199933000 | -1.363814000 | 3.152360000  |
| H | -5.913923000 | -0.342302000 | 2.484344000  |
| H | -7.595591000 | -0.073457000 | 2.006313000  |
| C | -7.061703000 | -0.402440000 | -0.859241000 |
| C | -8.520422000 | -0.739266000 | -0.850939000 |
| H | -6.640588000 | -0.031070000 | -1.787128000 |
| H | -6.994141000 | 1.525710000  | 0.057039000  |
| H | -9.045172000 | -0.059904000 | -1.523021000 |
| H | -8.714233000 | -1.762870000 | -1.201740000 |
| H | -8.976743000 | -0.641483000 | 0.138163000  |
| O | -6.210559000 | 3.000426000  | -0.810865000 |
| H | -6.872306000 | 3.640312000  | -1.097505000 |
| O | -6.816629000 | 2.443918000  | 0.351380000  |

Zero-point correction=  
(Hartree/Particle)

0.387794

|                                              |              |
|----------------------------------------------|--------------|
| Thermal correction to Energy=                | 0.419463     |
| Thermal correction to Enthalpy=              | 0.420407     |
| Thermal correction to Gibbs Free Energy=     | 0.317190     |
| Sum of electronic and zero-point Energies=   | -1572.569219 |
| Sum of electronic and thermal Energies=      | -1572.537550 |
| Sum of electronic and thermal Enthalpies=    | -1572.536606 |
| Sum of electronic and thermal Free Energies= | -1572.639823 |

### P-3-N8-H +HOO•

|   |              |              |              |
|---|--------------|--------------|--------------|
| C | 3.062551000  | 1.088764000  | -0.451358000 |
| C | 1.685486000  | 0.976627000  | -0.359072000 |
| C | 1.131668000  | -0.294017000 | -0.240291000 |
| C | 1.946802000  | -1.422738000 | -0.231055000 |
| C | 3.316101000  | -1.249068000 | -0.319182000 |
| C | 3.911520000  | -0.002812000 | -0.425753000 |
| H | 1.070940000  | 1.865999000  | -0.378589000 |
| H | 1.517503000  | -2.412734000 | -0.146530000 |
| H | 4.985079000  | 0.110813000  | -0.488179000 |
| N | 3.655954000  | 2.439595000  | -0.583111000 |
| O | 4.862939000  | 2.516749000  | -0.564558000 |
| O | 2.892494000  | 3.369923000  | -0.701921000 |
| N | 4.190127000  | -2.445156000 | -0.293997000 |
| O | 5.382532000  | -2.260969000 | -0.379709000 |
| O | 3.650247000  | -3.522536000 | -0.189796000 |
| C | -0.339513000 | -0.495523000 | -0.105120000 |
| O | -0.879209000 | -1.564200000 | -0.255976000 |
| N | -1.039804000 | 0.678119000  | 0.285000000  |
| H | -0.098782000 | 1.661334000  | 1.746363000  |
| N | -2.310603000 | 0.627764000  | 0.119691000  |

|   |              |              |              |
|---|--------------|--------------|--------------|
| C | -3.200084000 | -0.196256000 | 0.512727000  |
| H | -2.922426000 | -0.951786000 | 1.249486000  |
| C | -5.010531000 | 0.835013000  | -0.863065000 |
| C | -4.586522000 | -0.132986000 | 0.054226000  |
| C | -5.495447000 | -1.073904000 | 0.541192000  |
| C | -6.817891000 | -1.052246000 | 0.114653000  |
| C | -7.235156000 | -0.088695000 | -0.796458000 |
| C | -6.330173000 | 0.854655000  | -1.283479000 |
| H | -4.299729000 | 1.565372000  | -1.231701000 |
| H | -5.162973000 | -1.824786000 | 1.249809000  |
| H | -7.519926000 | -1.785088000 | 0.492562000  |
| H | -8.266186000 | -0.069083000 | -1.128541000 |
| H | -6.659150000 | 1.605171000  | -1.991712000 |
| O | 0.850538000  | 0.312687000  | 2.622586000  |
| H | 0.638473000  | 0.223899000  | 3.559084000  |
| O | 0.617285000  | 1.701814000  | 2.405259000  |

Zero-point correction=  
(Hartree/Particle)

0.252784

|                                              |              |
|----------------------------------------------|--------------|
| Thermal correction to Energy=                | 0.276261     |
| Thermal correction to Enthalpy=              | 0.277205     |
| Thermal correction to Gibbs Free Energy=     | 0.193535     |
| Sum of electronic and zero-point Energies=   | -1284.922337 |
| Sum of electronic and thermal Energies=      | -1284.898860 |
| Sum of electronic and thermal Enthalpies=    | -1284.897915 |
| Sum of electronic and thermal Free Energies= | -1284.981586 |

#### P-4-N8-H +HOO•

|   |              |              |              |
|---|--------------|--------------|--------------|
| C | -4.970249000 | 0.522795000  | -0.100144000 |
| C | -3.796352000 | 1.226066000  | -0.306513000 |
| C | -2.549133000 | 0.626876000  | -0.305378000 |
| C | -2.463152000 | -0.742182000 | -0.064888000 |
| C | -3.619719000 | -1.491793000 | 0.134853000  |
| C | -4.842004000 | -0.840307000 | 0.114217000  |
| H | -5.936991000 | 1.007548000  | -0.105323000 |
| H | -1.663720000 | 1.215457000  | -0.502920000 |
| H | -3.560913000 | -2.559563000 | 0.306176000  |
| C | -1.130290000 | -1.431740000 | -0.029292000 |
| O | -1.017051000 | -2.630867000 | -0.107728000 |
| N | -0.076749000 | -0.515162000 | 0.133473000  |
| H | -0.180104000 | 1.159209000  | 1.058070000  |
| N | 1.092428000  | -1.054149000 | -0.030285000 |
| C | 2.118340000  | -0.213230000 | 0.091686000  |
| C | 3.439228000  | -0.674207000 | -0.045190000 |
| C | 4.563526000  | 0.244069000  | 0.065596000  |
| C | 5.879148000  | -0.261880000 | -0.062704000 |
| C | 6.073936000  | -1.659197000 | -0.303906000 |
| C | 5.032755000  | -2.524841000 | -0.416351000 |
| C | 3.699266000  | -2.057597000 | -0.290181000 |
| H | 1.896623000  | 0.832884000  | 0.286328000  |
| C | 5.501846000  | 2.456026000  | 0.393397000  |
| C | 4.404366000  | 1.626408000  | 0.294044000  |
| C | 6.984979000  | 0.603752000  | 0.042554000  |
| C | 6.803545000  | 1.948551000  | 0.269086000  |
| H | 5.351091000  | 3.514201000  | 0.569230000  |
| H | 3.420321000  | 2.065655000  | 0.393404000  |
| H | 7.982397000  | 0.190325000  | -0.059115000 |
| H | 7.655830000  | 2.611523000  | 0.349505000  |
| H | 5.174726000  | -3.581845000 | -0.600101000 |
| H | 7.091115000  | -2.024401000 | -0.399259000 |
| O | 2.755545000  | -2.961201000 | -0.409275000 |
| H | 1.859838000  | -2.532143000 | -0.308685000 |



|   |              |              |              |
|---|--------------|--------------|--------------|
| N | -6.076801000 | -1.630867000 | 0.337247000  |
| O | -7.128263000 | -1.033703000 | 0.303305000  |
| O | -5.944824000 | -2.815660000 | 0.536550000  |
| N | -3.871625000 | 2.687337000  | -0.527708000 |
| O | -2.823141000 | 3.298433000  | -0.583148000 |
| O | -4.967908000 | 3.178661000  | -0.635733000 |
| O | 0.121186000  | 2.651272000  | -0.023546000 |
| H | -0.671738000 | 3.195218000  | -0.136890000 |
| O | -0.079228000 | 2.106868000  | 1.278971000  |

Zero-point correction=  
(Hartree/Particle)

0.305525

|                                              |              |
|----------------------------------------------|--------------|
| Thermal correction to Energy=                | 0.331932     |
| Thermal correction to Enthalpy=              | 0.332876     |
| Thermal correction to Gibbs Free Energy=     | 0.244062     |
| Sum of electronic and zero-point Energies=   | -1513.734411 |
| Sum of electronic and thermal Energies=      | -1513.708004 |
| Sum of electronic and thermal Enthalpies=    | -1513.707060 |
| Sum of electronic and thermal Free Energies= | -1513.795874 |

### P-5-N8-H +HOO•

|   |              |              |              |
|---|--------------|--------------|--------------|
| C | -3.363412000 | 1.050185000  | -0.545742000 |
| C | -2.043968000 | 0.640565000  | -0.431632000 |
| C | -1.786508000 | -0.678978000 | -0.064569000 |
| C | -2.841790000 | -1.560445000 | 0.165996000  |
| C | -4.137740000 | -1.091580000 | 0.050758000  |
| C | -4.437592000 | 0.214227000  | -0.302093000 |
| H | -1.250492000 | 1.346632000  | -0.642710000 |
| H | -2.644991000 | -2.591587000 | 0.431284000  |
| H | -5.458337000 | 0.561279000  | -0.386010000 |
| N | -5.261469000 | -2.023538000 | 0.309324000  |
| O | -6.382092000 | -1.583607000 | 0.191193000  |
| O | -4.978679000 | -3.156961000 | 0.620963000  |
| N | -3.640589000 | 2.447135000  | -0.955997000 |
| O | -4.785847000 | 2.828715000  | -0.873397000 |
| O | -2.704217000 | 3.103023000  | -1.347459000 |
| C | -0.390006000 | -1.218358000 | 0.059885000  |
| O | -0.163726000 | -2.400511000 | 0.071279000  |
| N | 0.583007000  | -0.204488000 | 0.229050000  |
| N | 1.790495000  | -0.624027000 | -0.000938000 |
| C | 2.723964000  | 0.279862000  | 0.268032000  |
| H | 2.441955000  | 1.244248000  | 0.694139000  |
| C | 6.403171000  | 0.738470000  | 0.095256000  |
| C | 6.802704000  | -0.496707000 | -0.428640000 |
| C | 5.856091000  | -1.489484000 | -0.726017000 |
| C | 4.522550000  | -1.247577000 | -0.503296000 |
| C | 4.097623000  | -0.005230000 | 0.024368000  |
| C | 5.063118000  | 0.977123000  | 0.318643000  |
| H | 7.144864000  | 1.496989000  | 0.321590000  |
| H | 6.205543000  | -2.432085000 | -1.127490000 |
| H | 3.776168000  | -2.000841000 | -0.723068000 |
| H | 0.164826000  | 1.428403000  | 1.014655000  |
| H | 4.741900000  | 1.930139000  | 0.724535000  |
| O | 8.091485000  | -0.795358000 | -0.670199000 |
| H | 8.662595000  | -0.056299000 | -0.438703000 |
| O | 1.199724000  | 2.520988000  | 2.136267000  |
| H | 0.869067000  | 2.535694000  | 3.041468000  |
| O | 0.003047000  | 2.321136000  | 1.388168000  |

Zero-point correction=  
(Hartree/Particle)

0.257044

|                                 |          |
|---------------------------------|----------|
| Thermal correction to Energy=   | 0.281671 |
| Thermal correction to Enthalpy= | 0.282615 |

|                                              |              |
|----------------------------------------------|--------------|
| Thermal correction to Gibbs Free Energy=     | 0.195780     |
| Sum of electronic and zero-point Energies=   | -1360.145691 |
| Sum of electronic and thermal Energies=      | -1360.121064 |
| Sum of electronic and thermal Enthalpies=    | -1360.120120 |
| Sum of electronic and thermal Free Energies= | -1360.206955 |

**P-5-O4'-H +HOO•**

|   |              |              |              |
|---|--------------|--------------|--------------|
| C | -4.236131000 | 1.369642000  | -0.136762000 |
| C | -2.931034000 | 0.938914000  | -0.322692000 |
| C | -2.646757000 | -0.416010000 | -0.183024000 |
| C | -3.669655000 | -1.316337000 | 0.113682000  |
| C | -4.951203000 | -0.829963000 | 0.294484000  |
| C | -5.274085000 | 0.512344000  | 0.175906000  |
| H | -2.181881000 | 1.668755000  | -0.602714000 |
| H | -3.460046000 | -2.375760000 | 0.194220000  |
| H | -6.285716000 | 0.868970000  | 0.315376000  |
| N | -6.038021000 | -1.785164000 | 0.626499000  |
| O | -7.148635000 | -1.327268000 | 0.761644000  |
| O | -5.732171000 | -2.948346000 | 0.739038000  |
| N | -4.531012000 | 2.814704000  | -0.287888000 |
| O | -5.680574000 | 3.160206000  | -0.158954000 |
| O | -3.594898000 | 3.544805000  | -0.525981000 |
| C | -1.274173000 | -0.997955000 | -0.394841000 |
| O | -1.115067000 | -2.131855000 | -0.756175000 |
| N | -0.237237000 | -0.121245000 | -0.125796000 |
| N | 1.034574000  | -0.514703000 | -0.318571000 |
| C | 1.959111000  | 0.300444000  | 0.046343000  |
| H | 1.724037000  | 1.269311000  | 0.499949000  |
| C | 5.667686000  | 0.610600000  | 0.135324000  |
| C | 6.091774000  | -0.649990000 | -0.458481000 |
| C | 5.049973000  | -1.581053000 | -0.872184000 |
| C | 3.735195000  | -1.280120000 | -0.712510000 |
| C | 3.350297000  | -0.036598000 | -0.131724000 |
| C | 4.340498000  | 0.888508000  | 0.283120000  |
| H | 6.439065000  | 1.299073000  | 0.458617000  |
| H | 5.377629000  | -2.515783000 | -1.310722000 |
| H | 2.956245000  | -1.967967000 | -1.018349000 |
| H | -0.425919000 | 0.761858000  | 0.339139000  |
| H | 4.028597000  | 1.828411000  | 0.726591000  |
| O | 7.290809000  | -0.927693000 | -0.615285000 |
| H | 8.525250000  | 0.288226000  | -0.081630000 |
| O | 8.414616000  | 0.915027000  | 1.680765000  |
| H | 9.154159000  | 0.565717000  | 2.190487000  |
| O | 8.976105000  | 1.025061000  | 0.376134000  |

|                        |  |          |
|------------------------|--|----------|
| Zero-point correction= |  | 0.256956 |
| (Hartree/Particle)     |  |          |

|                                              |              |
|----------------------------------------------|--------------|
| Thermal correction to Energy=                | 0.281539     |
| Thermal correction to Enthalpy=              | 0.282483     |
| Thermal correction to Gibbs Free Energy=     | 0.195519     |
| Sum of electronic and zero-point Energies=   | -1360.149023 |
| Sum of electronic and thermal Energies=      | -1360.124440 |
| Sum of electronic and thermal Enthalpies=    | -1360.123496 |
| Sum of electronic and thermal Free Energies= | -1360.210460 |

**P-6-N8-H +HOO•**

|   |              |              |              |
|---|--------------|--------------|--------------|
| C | -4.115992000 | 0.979064000  | -0.595452000 |
| C | -2.780577000 | 0.623565000  | -0.483767000 |
| C | -2.467893000 | -0.674474000 | -0.084308000 |
| C | -3.486821000 | -1.588767000 | 0.177719000  |
| C | -4.801547000 | -1.173659000 | 0.063902000  |

|   |              |              |              |
|---|--------------|--------------|--------------|
| C | -5.155319000 | 0.109783000  | -0.319263000 |
| H | -2.015890000 | 1.352742000  | -0.720171000 |
| H | -3.246714000 | -2.604434000 | 0.465639000  |
| H | -6.189213000 | 0.415082000  | -0.402112000 |
| N | -5.885628000 | -2.140858000 | 0.356336000  |
| O | -7.024308000 | -1.748657000 | 0.237714000  |
| O | -5.557940000 | -3.254757000 | 0.694478000  |
| N | -4.451431000 | 2.351385000  | -1.041820000 |
| O | -5.608296000 | 2.695238000  | -0.947104000 |
| O | -3.548443000 | 3.028486000  | -1.473665000 |
| C | -1.048487000 | -1.158300000 | 0.042058000  |
| O | -0.787099000 | -2.335959000 | 0.050908000  |
| N | -0.124910000 | -0.109405000 | 0.202995000  |
| N | 1.107511000  | -0.493171000 | 0.047307000  |
| C | 2.000749000  | 0.453605000  | 0.307429000  |
| H | 1.671082000  | 1.429431000  | 0.669150000  |
| C | 5.670827000  | 1.009904000  | 0.266805000  |
| C | 6.160969000  | -0.245485000 | -0.186917000 |
| C | 5.213025000  | -1.271219000 | -0.469599000 |
| C | 3.871436000  | -1.051858000 | -0.311098000 |
| C | 3.382470000  | 0.200224000  | 0.138613000  |
| C | 4.323689000  | 1.216054000  | 0.421405000  |
| H | 6.356060000  | 1.814008000  | 0.493065000  |
| H | 5.548165000  | -2.239372000 | -0.813198000 |
| H | 3.156431000  | -1.836898000 | -0.525185000 |
| H | -0.618679000 | 1.496912000  | 0.926466000  |
| H | 3.965696000  | 2.179739000  | 0.767987000  |
| N | 7.489858000  | -0.461433000 | -0.345230000 |
| C | 7.973996000  | -1.752020000 | -0.812589000 |
| C | 8.444360000  | 0.596334000  | -0.050105000 |
| H | 7.692025000  | -2.552575000 | -0.123037000 |
| H | 7.577831000  | -1.985945000 | -1.804622000 |
| H | 9.058438000  | -1.720935000 | -0.875851000 |
| H | 9.449667000  | 0.228714000  | -0.237653000 |
| H | 8.273206000  | 1.470281000  | -0.685017000 |
| H | 8.380235000  | 0.904182000  | 0.997410000  |
| O | 0.276638000  | 2.676796000  | 2.084497000  |
| H | -0.058109000 | 2.613426000  | 2.985920000  |
| O | -0.882720000 | 2.360541000  | 1.317558000  |

Zero-point correction=  
(Hartree/Particle)

0.326912

|                                              |              |
|----------------------------------------------|--------------|
| Thermal correction to Energy=                | 0.354656     |
| Thermal correction to Enthalpy=              | 0.355600     |
| Thermal correction to Gibbs Free Energy=     | 0.262082     |
| Sum of electronic and zero-point Energies=   | -1418.802611 |
| Sum of electronic and thermal Energies=      | -1418.774867 |
| Sum of electronic and thermal Enthalpies=    | -1418.773923 |
| Sum of electronic and thermal Free Energies= | -1418.867441 |

**P-BHA +HOO•**

|   |              |              |              |
|---|--------------|--------------|--------------|
| C | 2.055368000  | 0.984434000  | 0.682229000  |
| C | 2.130968000  | -0.237063000 | -0.014006000 |
| C | 0.972945000  | -1.020761000 | -0.236433000 |
| C | -0.268007000 | -0.643642000 | 0.200109000  |
| C | -0.379120000 | 0.631980000  | 0.922468000  |
| C | 0.831775000  | 1.396039000  | 1.136260000  |
| H | 2.936714000  | 1.585568000  | 0.860736000  |
| H | 1.127624000  | -1.942452000 | -0.781793000 |
| H | 0.715167000  | 2.326539000  | 1.679630000  |
| O | -1.465632000 | 1.077919000  | 1.345032000  |
| H | -2.122966000 | 2.377090000  | 0.210852000  |
| O | 3.265070000  | -0.750643000 | -0.507747000 |

|   |              |              |              |
|---|--------------|--------------|--------------|
| C | 4.476648000  | -0.034495000 | -0.326225000 |
| H | 5.248982000  | -0.633119000 | -0.801527000 |
| H | 4.423790000  | 0.945859000  | -0.806221000 |
| H | 4.703060000  | 0.082025000  | 0.736503000  |
| C | -1.513387000 | -1.484118000 | -0.050109000 |
| C | -2.155117000 | -1.868565000 | 1.296906000  |
| C | -2.515849000 | -0.681506000 | -0.902141000 |
| C | -1.177745000 | -2.776228000 | -0.803148000 |
| H | -1.455244000 | -2.447990000 | 1.905622000  |
| H | -2.462475000 | -0.985821000 | 1.854834000  |
| H | -3.036037000 | -2.488948000 | 1.110434000  |
| H | -3.374390000 | -1.317989000 | -1.134188000 |
| H | -2.872492000 | 0.201993000  | -0.376642000 |
| H | -2.058237000 | -0.357614000 | -1.839487000 |
| H | -0.756269000 | -2.572261000 | -1.791048000 |
| H | -0.478346000 | -3.403983000 | -0.244108000 |
| H | -2.095743000 | -3.349724000 | -0.947567000 |
| O | -1.185450000 | 2.235557000  | -1.405857000 |
| H | -0.534304000 | 2.941488000  | -1.490542000 |
| O | -2.196452000 | 2.867528000  | -0.629046000 |

Zero-point correction=  
(Hartree/Particle)

0.268255

|                                              |             |
|----------------------------------------------|-------------|
| Thermal correction to Energy=                | 0.285720    |
| Thermal correction to Enthalpy=              | 0.286664    |
| Thermal correction to Gibbs Free Energy=     | 0.222055    |
| Sum of electronic and zero-point Energies=   | -729.797021 |
| Sum of electronic and thermal Energies=      | -729.779556 |
| Sum of electronic and thermal Enthalpies=    | -729.778612 |
| Sum of electronic and thermal Free Energies= | -729.843221 |

### P-1-O4'-H +CH<sub>3</sub>OO•

|   |              |              |              |
|---|--------------|--------------|--------------|
| C | -6.115433000 | 0.455120000  | 0.181489000  |
| C | -5.136370000 | 1.298064000  | -0.309409000 |
| C | -3.812180000 | 0.912537000  | -0.456440000 |
| C | -3.445443000 | -0.378157000 | -0.088205000 |
| C | -4.407272000 | -1.265274000 | 0.394049000  |
| C | -5.711294000 | -0.824808000 | 0.525819000  |
| H | -7.143252000 | 0.775177000  | 0.286548000  |
| H | -3.112423000 | 1.619495000  | -0.883944000 |
| H | -4.133634000 | -2.280541000 | 0.653144000  |
| C | -2.044844000 | -0.913804000 | -0.236790000 |
| O | -1.831385000 | -2.084368000 | -0.402612000 |
| N | -1.058861000 | 0.049664000  | -0.154014000 |
| H | -1.289321000 | 0.986817000  | 0.161553000  |
| N | 0.235262000  | -0.301590000 | -0.309744000 |
| C | 1.112541000  | 0.607305000  | -0.110652000 |
| C | 2.531843000  | 0.326157000  | -0.265575000 |
| C | 3.463138000  | 1.379331000  | -0.022840000 |
| C | 4.797589000  | 1.165321000  | -0.152242000 |
| C | 5.323396000  | -0.129062000 | -0.542306000 |
| C | 4.337279000  | -1.194936000 | -0.783212000 |
| C | 2.979841000  | -0.935233000 | -0.639272000 |
| H | 3.091579000  | 2.356483000  | 0.266478000  |
| H | 5.528782000  | 1.945137000  | 0.028730000  |
| H | 2.272833000  | -1.735105000 | -0.822604000 |
| O | 4.656004000  | -2.430061000 | -1.142982000 |
| O | 6.545667000  | -0.327750000 | -0.668035000 |
| H | 7.720678000  | 1.020279000  | -0.130625000 |
| C | 6.001902000  | -2.889957000 | -1.324365000 |
| H | 6.572934000  | -2.787537000 | -0.403546000 |

|   |              |              |              |
|---|--------------|--------------|--------------|
| H | 5.890720000  | -3.936663000 | -1.595967000 |
| H | 6.496082000  | -2.334617000 | -2.119074000 |
| N | -6.732922000 | -1.763139000 | 1.054307000  |
| O | -6.357391000 | -2.869657000 | 1.360749000  |
| O | -7.865664000 | -1.349492000 | 1.141177000  |
| N | -5.519437000 | 2.674498000  | -0.704747000 |
| O | -6.684596000 | 2.974488000  | -0.603412000 |
| O | -4.633674000 | 3.400845000  | -1.097242000 |
| H | 0.830857000  | 1.625151000  | 0.181327000  |
| C | 7.466503000  | 1.239188000  | 2.535987000  |
| H | 7.845739000  | 0.770117000  | 3.445033000  |
| H | 6.545709000  | 0.736959000  | 2.218541000  |
| H | 7.269506000  | 2.299120000  | 2.718159000  |
| O | 8.070502000  | 1.757814000  | 0.402758000  |
| O | 8.487756000  | 1.079800000  | 1.579528000  |

Zero-point correction=  
(Hartree/Particle)

0.318348

|                                              |              |
|----------------------------------------------|--------------|
| Thermal correction to Energy=                | 0.346970     |
| Thermal correction to Enthalpy=              | 0.347915     |
| Thermal correction to Gibbs Free Energy=     | 0.249681     |
| Sum of electronic and zero-point Energies=   | -1513.893754 |
| Sum of electronic and thermal Energies=      | -1513.865131 |
| Sum of electronic and thermal Enthalpies=    | -1513.864187 |
| Sum of electronic and thermal Free Energies= | -1513.962421 |

### P-1-N8-H+CH<sub>3</sub>OO•

|   |              |              |              |
|---|--------------|--------------|--------------|
| C | 5.043448000  | 0.010828000  | -0.474280000 |
| C | 4.061195000  | -0.903167000 | -0.809722000 |
| C | 2.706951000  | -0.644864000 | -0.665544000 |
| C | 2.313073000  | 0.594645000  | -0.166391000 |
| C | 3.272296000  | 1.549076000  | 0.170092000  |
| C | 4.609663000  | 1.232587000  | 0.014304000  |
| H | 6.094653000  | -0.215407000 | -0.588849000 |
| H | 1.984387000  | -1.396953000 | -0.951518000 |
| H | 2.969582000  | 2.518710000  | 0.545120000  |
| C | 0.867308000  | 0.968447000  | 0.006023000  |
| O | 0.532742000  | 2.102207000  | 0.237294000  |
| N | -0.002120000 | -0.144536000 | -0.073841000 |
| H | 0.386756000  | -1.817623000 | 0.821789000  |
| N | -1.252731000 | 0.206374000  | -0.125607000 |
| C | -2.086601000 | -0.824291000 | -0.122853000 |
| C | -3.495462000 | -0.616295000 | -0.158072000 |
| C | -4.351396000 | -1.732036000 | -0.132137000 |
| C | -5.721184000 | -1.561151000 | -0.159341000 |
| C | -6.263121000 | -0.275082000 | -0.209654000 |
| C | -5.414918000 | 0.857184000  | -0.245167000 |
| C | -4.052090000 | 0.681251000  | -0.214191000 |
| H | -3.928050000 | -2.728439000 | -0.081318000 |
| H | -6.385178000 | -2.418713000 | -0.129793000 |
| H | -3.403697000 | 1.549094000  | -0.223090000 |
| O | -5.947157000 | 2.107573000  | -0.242743000 |
| O | -7.588006000 | -0.041527000 | -0.217230000 |
| H | -8.075949000 | -0.868758000 | -0.156210000 |
| C | -6.551666000 | 2.500582000  | -1.474444000 |
| H | -7.384333000 | 1.842235000  | -1.728797000 |
| H | -6.918403000 | 3.513088000  | -1.322657000 |
| H | -5.807714000 | 2.494714000  | -2.276038000 |
| N | 5.631541000  | 2.243007000  | 0.380489000  |
| O | 5.233408000  | 3.301878000  | 0.806646000  |
| O | 6.791425000  | 1.935504000  | 0.227456000  |
| N | 4.479791000  | -2.216923000 | -1.353977000 |

|   |              |              |              |
|---|--------------|--------------|--------------|
| O | 5.666715000  | -2.444030000 | -1.397474000 |
| O | 3.604601000  | -2.968505000 | -1.717440000 |
| H | -1.697318000 | -1.841763000 | -0.087354000 |
| C | -0.222460000 | -1.089721000 | 3.276461000  |
| H | -1.066164000 | -0.708272000 | 3.852850000  |
| H | 0.332249000  | -0.252909000 | 2.838058000  |
| H | 0.435428000  | -1.682716000 | 3.915053000  |
| O | 0.272028000  | -2.480696000 | 1.531199000  |
| O | -0.793486000 | -1.898615000 | 2.268891000  |

Zero-point correction=  
(Hartree/Particle)

0.318279

|                                              |              |
|----------------------------------------------|--------------|
| Thermal correction to Energy=                | 0.346758     |
| Thermal correction to Enthalpy=              | 0.347702     |
| Thermal correction to Gibbs Free Energy=     | 0.251477     |
| Sum of electronic and zero-point Energies=   | -1513.884681 |
| Sum of electronic and thermal Energies=      | -1513.856203 |
| Sum of electronic and thermal Enthalpies=    | -1513.855258 |
| Sum of electronic and thermal Free Energies= | -1513.951484 |

### P-2-O2'-H +CH<sub>3</sub>OO•

|   |              |              |              |
|---|--------------|--------------|--------------|
| C | -6.108000000 | 0.243974000  | -0.390616000 |
| C | -5.077290000 | 1.025550000  | -0.877493000 |
| C | -3.752067000 | 0.615869000  | -0.875218000 |
| C | -3.439987000 | -0.637597000 | -0.357328000 |
| C | -4.453850000 | -1.464474000 | 0.124888000  |
| C | -5.756364000 | -1.000612000 | 0.106395000  |
| H | -7.134727000 | 0.583490000  | -0.402432000 |
| H | -3.006121000 | 1.272378000  | -1.305415000 |
| H | -4.220060000 | -2.453195000 | 0.499428000  |
| C | -2.041979000 | -1.201228000 | -0.340128000 |
| O | -1.842085000 | -2.387234000 | -0.378999000 |
| N | -1.049764000 | -0.248751000 | -0.266938000 |
| H | -1.283392000 | 0.717398000  | -0.053909000 |
| N | 0.249818000  | -0.622066000 | -0.279126000 |
| C | 1.097392000  | 0.328239000  | -0.083029000 |
| C | 2.506898000  | 0.058169000  | -0.070245000 |
| C | 3.425856000  | 1.178676000  | 0.208791000  |
| C | 4.833193000  | 0.909822000  | 0.190890000  |
| C | 5.332644000  | -0.354397000 | -0.043809000 |
| C | 4.386528000  | -1.430161000 | -0.297215000 |
| C | 3.033805000  | -1.218306000 | -0.307974000 |
| H | 5.466945000  | 1.765637000  | 0.370318000  |
| H | 2.351685000  | -2.038692000 | -0.496605000 |
| N | -6.833695000 | -1.874030000 | 0.634007000  |
| O | -6.504722000 | -2.950492000 | 1.073523000  |
| O | -7.962905000 | -1.443888000 | 0.587617000  |
| N | -5.405652000 | 2.357352000  | -1.440038000 |
| O | -6.567053000 | 2.689825000  | -1.430559000 |
| O | -4.485209000 | 3.017138000  | -1.866621000 |
| H | 0.782008000  | 1.358268000  | 0.090091000  |
| O | 2.972914000  | 2.315712000  | 0.433349000  |
| H | 1.651516000  | 2.659209000  | 1.662239000  |
| H | 4.753499000  | -2.432357000 | -0.466724000 |
| N | 6.669193000  | -0.652757000 | -0.007947000 |
| C | 7.197760000  | -1.881104000 | -0.600217000 |
| C | 7.039038000  | -1.959667000 | -2.118914000 |
| H | 6.742145000  | -2.751742000 | -0.121051000 |
| H | 8.256623000  | -1.918343000 | -0.340940000 |
| H | 7.457837000  | -2.896435000 | -2.492711000 |
| H | 5.988357000  | -1.915142000 | -2.411750000 |
| H | 7.556352000  | -1.132072000 | -2.605957000 |

|   |              |              |              |
|---|--------------|--------------|--------------|
| C | 7.630903000  | 0.386925000  | 0.338451000  |
| C | 8.036902000  | 1.274023000  | -0.839308000 |
| H | 8.510800000  | -0.108899000 | 0.753651000  |
| H | 7.206224000  | 0.985966000  | 1.145584000  |
| H | 8.669937000  | 2.094304000  | -0.494815000 |
| H | 8.600331000  | 0.702821000  | -1.579640000 |
| H | 7.158083000  | 1.697455000  | -1.328998000 |
| C | 0.309870000  | 0.455685000  | 3.215676000  |
| H | 0.690808000  | -0.509827000 | 3.549165000  |
| H | -0.454101000 | 0.304504000  | 2.445038000  |
| H | -0.118388000 | 1.003366000  | 4.059353000  |
| O | 0.935051000  | 2.413839000  | 2.280376000  |
| O | 1.423613000  | 1.134769000  | 2.694413000  |

Zero-point correction=  
(Hartree/Particle)

0.416656

|                                              |              |
|----------------------------------------------|--------------|
| Thermal correction to Energy=                | 0.449128     |
| Thermal correction to Enthalpy=              | 0.450073     |
| Thermal correction to Gibbs Free Energy=     | 0.345786     |
| Sum of electronic and zero-point Energies=   | -1611.845428 |
| Sum of electronic and thermal Energies=      | -1611.812956 |
| Sum of electronic and thermal Enthalpies=    | -1611.812011 |
| Sum of electronic and thermal Free Energies= | -1611.916298 |

**P-2-N8-H +CH<sub>3</sub>OO•**

|   |              |              |              |
|---|--------------|--------------|--------------|
| C | -5.885972000 | 0.087131000  | -0.535289000 |
| C | -4.858674000 | 0.974329000  | -0.801289000 |
| C | -3.518861000 | 0.639364000  | -0.680292000 |
| C | -3.186306000 | -0.652815000 | -0.278932000 |
| C | -4.192601000 | -1.581101000 | -0.017127000 |
| C | -5.513246000 | -1.188499000 | -0.144565000 |
| H | -6.924213000 | 0.373476000  | -0.629656000 |
| H | -2.758112000 | 1.373199000  | -0.909122000 |
| H | -3.936720000 | -2.590611000 | 0.278825000  |
| C | -1.758610000 | -1.111490000 | -0.136936000 |
| O | -1.492786000 | -2.284597000 | -0.023859000 |
| N | -0.847387000 | -0.044352000 | -0.103097000 |
| H | -1.225423000 | 1.530080000  | 0.884951000  |
| N | 0.391062000  | -0.444692000 | -0.118101000 |
| C | 1.270186000  | 0.544627000  | -0.004631000 |
| C | 2.651553000  | 0.252285000  | 0.000357000  |
| C | 3.611371000  | 1.292926000  | 0.106711000  |
| C | 4.965247000  | 1.026341000  | 0.129576000  |
| C | 5.446744000  | -0.303338000 | 0.057442000  |
| C | 4.483620000  | -1.351761000 | -0.068375000 |
| C | 3.147372000  | -1.072354000 | -0.089591000 |
| H | 5.648992000  | 1.862487000  | 0.188979000  |
| H | 2.420898000  | -1.871420000 | -0.173206000 |
| N | -6.583749000 | -2.172316000 | 0.143379000  |
| O | -6.240732000 | -3.279699000 | 0.487433000  |
| O | -7.727838000 | -1.799150000 | 0.014920000  |
| N | -5.212672000 | 2.343490000  | -1.244082000 |
| O | -6.386410000 | 2.637683000  | -1.248040000 |
| O | -4.304648000 | 3.071603000  | -1.572750000 |
| H | 0.931833000  | 1.574103000  | 0.096754000  |
| O | 3.130911000  | 2.550826000  | 0.167817000  |
| H | 3.842998000  | 3.183257000  | 0.299341000  |
| H | 4.801001000  | -2.380782000 | -0.141879000 |
| N | 6.776688000  | -0.576617000 | 0.116137000  |
| C | 7.277554000  | -1.935652000 | -0.095830000 |
| C | 7.250713000  | -2.377765000 | -1.558576000 |
| H | 6.708407000  | -2.626868000 | 0.529097000  |

|   |              |              |              |
|---|--------------|--------------|--------------|
| H | 8.300903000  | -1.958626000 | 0.279739000  |
| H | 6.243726000  | -2.309892000 | -1.973026000 |
| H | 7.908804000  | -1.754313000 | -2.165203000 |
| H | 7.588366000  | -3.412637000 | -1.642747000 |
| C | 7.761111000  | 0.496329000  | 0.233272000  |
| C | 8.083432000  | 1.181257000  | -1.094973000 |
| H | 8.666650000  | 0.058800000  | 0.655184000  |
| H | 7.404851000  | 1.219749000  | 0.969364000  |
| H | 8.759256000  | 2.023097000  | -0.931130000 |
| H | 8.569220000  | 0.486270000  | -1.781197000 |
| H | 7.176965000  | 1.552194000  | -1.576718000 |
| C | -0.888569000 | 0.573700000  | 3.311896000  |
| H | -0.110204000 | 0.136255000  | 3.938756000  |
| H | -1.385382000 | -0.216551000 | 2.738376000  |
| H | -1.617954000 | 1.102568000  | 3.929668000  |
| O | -1.204783000 | 2.122446000  | 1.665280000  |
| O | -0.218569000 | 1.474200000  | 2.456462000  |

Zero-point correction=  
(Hartree/Particle)

0.417072

|                                              |              |
|----------------------------------------------|--------------|
| Thermal correction to Energy=                | 0.449712     |
| Thermal correction to Enthalpy=              | 0.450656     |
| Thermal correction to Gibbs Free Energy=     | 0.344481     |
| Sum of electronic and zero-point Energies=   | -1611.843833 |
| Sum of electronic and thermal Energies=      | -1611.811193 |
| Sum of electronic and thermal Enthalpies=    | -1611.810249 |
| Sum of electronic and thermal Free Energies= | -1611.916425 |

**P-2-C7'-H +CH<sub>3</sub>OO•**

|   |              |              |              |
|---|--------------|--------------|--------------|
| C | 6.796189000  | 0.562452000  | -0.031907000 |
| C | 5.696310000  | 1.385465000  | 0.119180000  |
| C | 4.402749000  | 0.901555000  | 0.251150000  |
| C | 4.194971000  | -0.473968000 | 0.224654000  |
| C | 5.281195000  | -1.338293000 | 0.093670000  |
| C | 6.548247000  | -0.800739000 | -0.041671000 |
| H | 7.796793000  | 0.960177000  | -0.131247000 |
| H | 3.596941000  | 1.608702000  | 0.401871000  |
| H | 5.128096000  | -2.410200000 | 0.106183000  |
| C | 2.837017000  | -1.111703000 | 0.396773000  |
| O | 2.723825000  | -2.211181000 | 0.876622000  |
| N | 1.795913000  | -0.336193000 | -0.040710000 |
| H | 1.979571000  | 0.497475000  | -0.589662000 |
| N | 0.513352000  | -0.778451000 | 0.084897000  |
| C | -0.385638000 | -0.050393000 | -0.452920000 |
| C | -1.795789000 | -0.417864000 | -0.376670000 |
| C | -2.766165000 | 0.411980000  | -0.947271000 |
| C | -4.114910000 | 0.080318000  | -0.894959000 |
| C | -4.529041000 | -1.076480000 | -0.236646000 |
| C | -3.562876000 | -1.916422000 | 0.343986000  |
| C | -2.225940000 | -1.586827000 | 0.264504000  |
| H | -4.841120000 | 0.766693000  | -1.311797000 |
| H | -1.474105000 | -2.238404000 | 0.693672000  |
| N | 7.702481000  | -1.719942000 | -0.197531000 |
| O | 7.465542000  | -2.904613000 | -0.218038000 |
| O | 8.798048000  | -1.216515000 | -0.295162000 |
| N | 5.910341000  | 2.851496000  | 0.152678000  |
| O | 7.048452000  | 3.247212000  | 0.063715000  |
| O | 4.927649000  | 3.550156000  | 0.263105000  |
| H | -0.139440000 | 0.872270000  | -0.986585000 |
| O | -2.349871000 | 1.565158000  | -1.538277000 |
| H | -3.112914000 | 2.109458000  | -1.756104000 |
| H | -3.859335000 | -2.842314000 | 0.818429000  |



|   |              |              |              |
|---|--------------|--------------|--------------|
| N | -5.897673000 | -1.413567000 | -0.167136000 |
| C | -6.435036000 | -1.756394000 | 1.154090000  |
| C | -6.762355000 | -0.503790000 | 1.965276000  |
| H | -5.698616000 | -2.360170000 | 1.680187000  |
| H | -7.318783000 | -2.379706000 | 1.016078000  |
| H | -7.125704000 | -0.774169000 | 2.958601000  |
| H | -5.870278000 | 0.118217000  | 2.069854000  |
| H | -7.530893000 | 0.091005000  | 1.464829000  |
| C | -6.770950000 | -0.924646000 | -1.125837000 |
| C | -8.208152000 | -1.345006000 | -1.109547000 |
| H | -6.305618000 | -0.764590000 | -2.092644000 |
| H | -6.961347000 | 1.137823000  | -0.726387000 |
| H | -8.724627000 | -0.882814000 | -1.951077000 |
| H | -8.323144000 | -2.433678000 | -1.209757000 |
| H | -8.731449000 | -1.044528000 | -0.197280000 |
| C | -6.447065000 | 3.046711000  | 1.356049000  |
| H | -5.629014000 | 3.207951000  | 2.059491000  |
| H | -7.256285000 | 2.493914000  | 1.841392000  |
| H | -6.818714000 | 4.005903000  | 0.988296000  |
| O | -6.913468000 | 2.115073000  | -0.665626000 |
| O | -5.883613000 | 2.294943000  | 0.303267000  |

Zero-point correction=  
(Hartree/Particle)

0.415849

|                                              |              |
|----------------------------------------------|--------------|
| Thermal correction to Energy=                | 0.448682     |
| Thermal correction to Enthalpy=              | 0.449627     |
| Thermal correction to Gibbs Free Energy=     | 0.344272     |
| Sum of electronic and zero-point Energies=   | -1611.834064 |
| Sum of electronic and thermal Energies=      | -1611.801230 |
| Sum of electronic and thermal Enthalpies=    | -1611.800286 |
| Sum of electronic and thermal Free Energies= | -1611.905641 |

### **P-3-N8-H+CH<sub>3</sub>OO•**

|   |              |              |              |
|---|--------------|--------------|--------------|
| C | 3.209850000  | 1.251637000  | -0.406438000 |
| C | 1.885124000  | 0.843961000  | -0.384400000 |
| C | 1.607794000  | -0.512836000 | -0.233006000 |
| C | 2.649973000  | -1.431442000 | -0.111506000 |
| C | 3.952027000  | -0.966531000 | -0.136492000 |
| C | 4.271348000  | 0.373948000  | -0.281948000 |
| H | 1.094988000  | 1.574799000  | -0.489251000 |
| H | 2.437923000  | -2.487500000 | -0.000911000 |
| H | 5.297285000  | 0.715658000  | -0.298246000 |
| N | 3.506145000  | 2.694550000  | -0.574736000 |
| O | 4.668329000  | 3.026475000  | -0.547717000 |
| O | 2.563889000  | 3.437327000  | -0.728293000 |
| N | 5.062392000  | -1.940764000 | -0.003463000 |
| O | 6.188588000  | -1.500841000 | -0.034470000 |
| O | 4.762768000  | -3.104550000 | 0.126548000  |
| C | 0.204258000  | -1.045467000 | -0.215245000 |
| O | -0.027969000 | -2.226199000 | -0.179825000 |
| N | -0.778754000 | -0.023699000 | -0.176859000 |
| H | -0.764655000 | 1.197587000  | 1.416015000  |
| N | -1.963838000 | -0.470649000 | -0.471675000 |
| C | -2.905683000 | 0.455808000  | -0.383609000 |
| H | -2.634579000 | 1.484143000  | -0.146098000 |
| C | -4.676477000 | -1.193314000 | -0.921533000 |
| C | -4.284164000 | 0.118434000  | -0.590100000 |
| C | -5.257831000 | 1.120541000  | -0.438334000 |
| C | -6.597927000 | 0.820396000  | -0.617193000 |
| C | -6.976904000 | -0.479399000 | -0.948925000 |
| C | -6.016708000 | -1.482613000 | -1.099713000 |
| H | -3.914477000 | -1.954742000 | -1.032921000 |

|   |              |              |              |
|---|--------------|--------------|--------------|
| H | -4.948632000 | 2.125123000  | -0.171509000 |
| H | -7.348414000 | 1.591745000  | -0.498157000 |
| H | -8.025414000 | -0.713766000 | -1.090086000 |
| H | -6.323020000 | -2.488966000 | -1.357064000 |
| C | -2.190314000 | -0.462052000 | 2.933546000  |
| H | -3.192164000 | -0.891635000 | 2.981382000  |
| H | -1.782442000 | -0.340417000 | 3.938760000  |
| H | -1.540017000 | -1.109576000 | 2.335827000  |
| O | -1.094633000 | 1.445469000  | 2.299079000  |
| O | -2.358995000 | 0.799200000  | 2.315776000  |

Zero-point correction=  
(Hartree/Particle)

0.280797

|                                              |              |
|----------------------------------------------|--------------|
| Thermal correction to Energy=                | 0.305435     |
| Thermal correction to Enthalpy=              | 0.306379     |
| Thermal correction to Gibbs Free Energy=     | 0.219101     |
| Sum of electronic and zero-point Energies=   | -1324.187693 |
| Sum of electronic and thermal Energies=      | -1324.163055 |
| Sum of electronic and thermal Enthalpies=    | -1324.162111 |
| Sum of electronic and thermal Free Energies= | -1324.249389 |

### P-4-N8-H+CH<sub>3</sub>OO•

|   |              |              |              |
|---|--------------|--------------|--------------|
| C | -5.153275000 | 0.453113000  | -0.212358000 |
| C | -4.040340000 | 1.188496000  | -0.576971000 |
| C | -2.754803000 | 0.670066000  | -0.570164000 |
| C | -2.574668000 | -0.657760000 | -0.186773000 |
| C | -3.673398000 | -1.439068000 | 0.168915000  |
| C | -4.930994000 | -0.863964000 | 0.155482000  |
| H | -6.145502000 | 0.883109000  | -0.216988000 |
| H | -1.926376000 | 1.296636000  | -0.873606000 |
| H | -3.538839000 | -2.475894000 | 0.450295000  |
| C | -1.224118000 | -1.310611000 | -0.164947000 |
| O | -1.098317000 | -2.509382000 | -0.092757000 |
| N | -0.159477000 | -0.387428000 | -0.205588000 |
| H | -0.231979000 | 1.362017000  | 0.637449000  |
| N | 0.991257000  | -0.987301000 | -0.269892000 |
| C | 2.053865000  | -0.186880000 | -0.281729000 |
| C | 3.351802000  | -0.727313000 | -0.278815000 |
| C | 4.514367000  | 0.144971000  | -0.212714000 |
| C | 5.807141000  | -0.427588000 | -0.270233000 |
| C | 5.940249000  | -1.849323000 | -0.373253000 |
| C | 4.862027000  | -2.675913000 | -0.405201000 |
| C | 3.549282000  | -2.140033000 | -0.348933000 |
| H | 1.887078000  | 0.886322000  | -0.273411000 |
| C | 5.544172000  | 2.331385000  | -0.018474000 |
| C | 4.411729000  | 1.545204000  | -0.074316000 |
| C | 6.948611000  | 0.395413000  | -0.213478000 |
| C | 6.823465000  | 1.760364000  | -0.092497000 |
| H | 5.439068000  | 3.404453000  | 0.087013000  |
| H | 3.445379000  | 2.028612000  | 0.001476000  |
| H | 7.928317000  | -0.067017000 | -0.263169000 |
| H | 7.703242000  | 2.390051000  | -0.049028000 |
| H | 4.958676000  | -3.751666000 | -0.473368000 |
| H | 6.940564000  | -2.267021000 | -0.418346000 |
| O | 2.565375000  | -3.007087000 | -0.379780000 |
| H | 1.689435000  | -2.530295000 | -0.332792000 |
| N | -6.099603000 | -1.689838000 | 0.544005000  |
| O | -7.186391000 | -1.160001000 | 0.507715000  |
| O | -5.883628000 | -2.833615000 | 0.870557000  |
| N | -4.237466000 | 2.593853000  | -1.005567000 |
| O | -3.280993000 | 3.168162000  | -1.470570000 |
| O | -5.342848000 | 3.063841000  | -0.862215000 |

|   |              |             |             |
|---|--------------|-------------|-------------|
| C | 1.610049000  | 1.719942000 | 2.530131000 |
| H | 2.682785000  | 1.896274000 | 2.631233000 |
| H | 1.409819000  | 0.642476000 | 2.509906000 |
| H | 1.071267000  | 2.182951000 | 3.358661000 |
| O | -0.162878000 | 2.183298000 | 1.164906000 |
| O | 1.243819000  | 2.323656000 | 1.304885000 |

Zero-point correction=  
(Hartree/Particle)

0.333129

|                                              |              |
|----------------------------------------------|--------------|
| Thermal correction to Energy=                | 0.361183     |
| Thermal correction to Enthalpy=              | 0.362127     |
| Thermal correction to Gibbs Free Energy=     | 0.267231     |
| Sum of electronic and zero-point Energies=   | -1552.996104 |
| Sum of electronic and thermal Energies=      | -1552.968050 |
| Sum of electronic and thermal Enthalpies=    | -1552.967106 |
| Sum of electronic and thermal Free Energies= | -1553.062002 |

### P-5-N8-H +CH<sub>3</sub>OO•

|   |              |              |              |
|---|--------------|--------------|--------------|
| C | -3.211328000 | 0.696120000  | -0.621572000 |
| C | -1.884835000 | 0.300679000  | -0.621478000 |
| C | -1.577875000 | -0.999680000 | -0.233569000 |
| C | -2.598131000 | -1.894759000 | 0.085660000  |
| C | -3.906989000 | -1.447834000 | 0.052839000  |
| C | -4.251161000 | -0.145090000 | -0.275883000 |
| H | -1.122859000 | 1.014162000  | -0.904087000 |
| H | -2.366215000 | -2.914580000 | 0.366159000  |
| H | -5.278437000 | 0.192476000  | -0.260376000 |
| N | -4.993719000 | -2.390852000 | 0.405522000  |
| O | -6.127357000 | -1.969874000 | 0.360365000  |
| O | -4.673048000 | -3.515718000 | 0.712245000  |
| N | -3.515810000 | 2.100520000  | -0.962498000 |
| O | -4.592454000 | 2.532924000  | -0.615359000 |
| O | -2.666792000 | 2.724403000  | -1.556830000 |
| C | -0.158284000 | -1.469858000 | -0.121571000 |
| O | 0.136173000  | -2.636321000 | -0.106810000 |
| N | 0.751968000  | -0.391756000 | 0.045534000  |
| N | 1.990065000  | -0.761746000 | -0.069637000 |
| C | 2.855388000  | 0.218751000  | 0.150618000  |
| H | 2.491782000  | 1.215505000  | 0.410200000  |
| C | 6.513985000  | 0.859188000  | 0.202492000  |
| C | 7.010513000  | -0.408556000 | -0.122822000 |
| C | 6.136570000  | -1.480451000 | -0.361535000 |
| C | 4.779649000  | -1.285497000 | -0.276124000 |
| C | 4.257188000  | -0.011733000 | 0.051466000  |
| C | 5.150575000  | 1.050804000  | 0.287967000  |
| H | 7.199509000  | 1.679792000  | 0.384949000  |
| H | 6.559140000  | -2.445787000 | -0.609229000 |
| H | 4.088134000  | -2.099652000 | -0.454518000 |
| H | 0.217312000  | 1.387733000  | 0.672180000  |
| H | 4.757461000  | 2.029560000  | 0.539943000  |
| O | 8.326931000  | -0.664733000 | -0.222415000 |
| H | 8.843917000  | 0.126203000  | -0.040543000 |
| C | -1.525722000 | 3.850450000  | 1.153597000  |
| H | -0.891051000 | 4.399321000  | 1.854046000  |
| H | -2.572023000 | 3.932893000  | 1.451640000  |
| H | -1.395842000 | 4.229908000  | 0.137510000  |
| O | 0.123189000  | 2.354763000  | 0.776962000  |
| O | -1.238595000 | 2.470068000  | 1.204239000  |

Zero-point correction=  
(Hartree/Particle)

0.285625

|                                 |          |
|---------------------------------|----------|
| Thermal correction to Energy=   | 0.311321 |
| Thermal correction to Enthalpy= | 0.312266 |

|                                              |              |
|----------------------------------------------|--------------|
| Thermal correction to Gibbs Free Energy=     | 0.223832     |
| Sum of electronic and zero-point Energies=   | -1399.413094 |
| Sum of electronic and thermal Energies=      | -1399.387397 |
| Sum of electronic and thermal Enthalpies=    | -1399.386453 |
| Sum of electronic and thermal Free Energies= | -1399.474886 |

**P-5-O4'-H +CH<sub>3</sub>OO•**

|   |              |              |              |
|---|--------------|--------------|--------------|
| C | -4.624948000 | 1.335917000  | -0.028232000 |
| C | -3.319426000 | 0.942688000  | -0.281949000 |
| C | -3.000898000 | -0.409733000 | -0.206787000 |
| C | -3.991457000 | -1.343970000 | 0.094659000  |
| C | -5.274788000 | -0.894421000 | 0.344735000  |
| C | -5.630870000 | 0.443685000  | 0.291377000  |
| H | -2.597625000 | 1.699321000  | -0.562643000 |
| H | -3.756080000 | -2.400598000 | 0.125329000  |
| H | -6.643499000 | 0.771441000  | 0.484208000  |
| N | -6.326629000 | -1.886310000 | 0.681848000  |
| O | -7.440480000 | -1.459584000 | 0.878398000  |
| O | -5.991568000 | -3.045581000 | 0.736893000  |
| N | -4.956634000 | 2.778532000  | -0.111182000 |
| O | -6.107053000 | 3.092417000  | 0.077211000  |
| O | -4.046964000 | 3.538436000  | -0.358315000 |
| C | -1.626092000 | -0.951295000 | -0.496775000 |
| O | -1.458052000 | -2.065733000 | -0.910884000 |
| N | -0.597935000 | -0.062621000 | -0.233845000 |
| N | 0.672792000  | -0.417276000 | -0.496967000 |
| C | 1.594099000  | 0.403047000  | -0.135414000 |
| H | 1.357454000  | 1.345086000  | 0.370847000  |
| C | 5.295455000  | 0.796090000  | -0.186506000 |
| C | 5.721116000  | -0.424893000 | -0.857608000 |
| C | 4.682513000  | -1.359835000 | -1.271244000 |
| C | 3.369689000  | -1.097828000 | -1.042518000 |
| C | 2.983346000  | 0.107898000  | -0.387412000 |
| C | 3.970075000  | 1.036036000  | 0.028553000  |
| H | 6.065610000  | 1.484809000  | 0.138414000  |
| H | 5.010755000  | -2.264737000 | -1.768107000 |
| H | 2.593311000  | -1.788735000 | -1.348006000 |
| H | -0.785786000 | 0.795751000  | 0.275597000  |
| H | 3.657290000  | 1.946705000  | 0.528736000  |
| O | 6.918121000  | -0.665961000 | -1.078076000 |
| H | 8.149974000  | 0.502146000  | -0.356072000 |
| C | 8.627981000  | -0.464047000 | 2.024967000  |
| H | 8.107297000  | -0.761712000 | 2.936312000  |
| H | 9.641031000  | -0.131755000 | 2.262217000  |
| H | 8.661986000  | -1.303651000 | 1.323649000  |
| O | 8.548689000  | 1.067715000  | 0.334349000  |
| O | 7.870101000  | 0.601243000  | 1.491859000  |

|                        |  |          |
|------------------------|--|----------|
| Zero-point correction= |  | 0.285332 |
| (Hartree/Particle)     |  |          |

|                                              |              |
|----------------------------------------------|--------------|
| Thermal correction to Energy=                | 0.311109     |
| Thermal correction to Enthalpy=              | 0.312053     |
| Thermal correction to Gibbs Free Energy=     | 0.221296     |
| Sum of electronic and zero-point Energies=   | -1399.414821 |
| Sum of electronic and thermal Energies=      | -1399.389045 |
| Sum of electronic and thermal Enthalpies=    | -1399.388101 |
| Sum of electronic and thermal Free Energies= | -1399.478857 |

**P-6-N8-H +CH<sub>3</sub>OO•**

|   |              |              |              |
|---|--------------|--------------|--------------|
| C | -4.170172000 | 1.020911000  | -0.711693000 |
| C | -2.828138000 | 0.679342000  | -0.647852000 |
| C | -2.485875000 | -0.623353000 | -0.291471000 |

|   |              |              |              |
|---|--------------|--------------|--------------|
| C | -3.485210000 | -1.555520000 | -0.016822000 |
| C | -4.808056000 | -1.155884000 | -0.085153000 |
| C | -5.190139000 | 0.130236000  | -0.429942000 |
| H | -2.075022000 | 1.417513000  | -0.887677000 |
| H | -3.223064000 | -2.573305000 | 0.243274000  |
| H | -6.230159000 | 0.421690000  | -0.478816000 |
| N | -5.870956000 | -2.143768000 | 0.217573000  |
| O | -7.017442000 | -1.764912000 | 0.137654000  |
| O | -5.519136000 | -3.259268000 | 0.524199000  |
| N | -4.534533000 | 2.401675000  | -1.107890000 |
| O | -5.705420000 | 2.701595000  | -1.054514000 |
| O | -3.636689000 | 3.132047000  | -1.458698000 |
| C | -1.055961000 | -1.089409000 | -0.215583000 |
| O | -0.787618000 | -2.265406000 | -0.164417000 |
| N | -0.139723000 | -0.025521000 | -0.158484000 |
| N | 1.095652000  | -0.424569000 | -0.249020000 |
| C | 1.983970000  | 0.549239000  | -0.098802000 |
| H | 1.649719000  | 1.567605000  | 0.102189000  |
| C | 5.657164000  | 1.085466000  | -0.069311000 |
| C | 6.153966000  | -0.220731000 | -0.331966000 |
| C | 5.209283000  | -1.272055000 | -0.512889000 |
| C | 3.864386000  | -1.029287000 | -0.437666000 |
| C | 3.369056000  | 0.273456000  | -0.180292000 |
| C | 4.306820000  | 1.314667000  | 0.002253000  |
| H | 6.339744000  | 1.909657000  | 0.079172000  |
| H | 5.549404000  | -2.278403000 | -0.711124000 |
| H | 3.151285000  | -1.833331000 | -0.573273000 |
| H | -0.480501000 | 1.565783000  | 0.800080000  |
| H | 3.944246000  | 2.315882000  | 0.208952000  |
| N | 7.486292000  | -0.459998000 | -0.406629000 |
| C | 7.977751000  | -1.803965000 | -0.672035000 |
| C | 8.437334000  | 0.624532000  | -0.216132000 |
| H | 7.660022000  | -2.501676000 | 0.107816000  |
| H | 7.621341000  | -2.170479000 | -1.638733000 |
| H | 9.064149000  | -1.785432000 | -0.692612000 |
| H | 9.446027000  | 0.232947000  | -0.317080000 |
| H | 8.296164000  | 1.408666000  | -0.965318000 |
| H | 8.337521000  | 1.066704000  | 0.779255000  |
| C | -0.210214000 | 0.728783000  | 3.271806000  |
| H | 0.536080000  | 0.275438000  | 3.925593000  |
| H | -0.753781000 | -0.055545000 | 2.733712000  |
| H | -0.907115000 | 1.333575000  | 3.856252000  |
| O | -0.420270000 | 2.204287000  | 1.542024000  |
| O | 0.519202000  | 1.540332000  | 2.376350000  |

Zero-point correction=  
(Hartree/Particle)

0.355414

|                                              |              |
|----------------------------------------------|--------------|
| Thermal correction to Energy=                | 0.384288     |
| Thermal correction to Enthalpy=              | 0.385233     |
| Thermal correction to Gibbs Free Energy=     | 0.288353     |
| Sum of electronic and zero-point Energies=   | -1458.068628 |
| Sum of electronic and thermal Energies=      | -1458.039753 |
| Sum of electronic and thermal Enthalpies=    | -1458.038809 |
| Sum of electronic and thermal Free Energies= | -1458.135688 |

### P-BHA +CH<sub>3</sub>OO•

|   |              |              |              |
|---|--------------|--------------|--------------|
| C | 0.628727000  | -2.070735000 | -0.207188000 |
| C | 1.871031000  | -1.451378000 | 0.022555000  |
| C | 1.975695000  | -0.041456000 | 0.110840000  |
| C | 0.893744000  | 0.785275000  | -0.025499000 |
| C | -0.413302000 | 0.163150000  | -0.275839000 |
| C | -0.479712000 | -1.280457000 | -0.349511000 |

|   |              |              |              |
|---|--------------|--------------|--------------|
| H | 0.539362000  | -3.146834000 | -0.267772000 |
| H | 2.969470000  | 0.345989000  | 0.292953000  |
| H | -1.461716000 | -1.711450000 | -0.507652000 |
| O | -1.454506000 | 0.841469000  | -0.427181000 |
| H | -2.978115000 | 0.048168000  | -0.936051000 |
| O | 3.024034000  | -2.113220000 | 0.176304000  |
| C | 3.013828000  | -3.531276000 | 0.101323000  |
| H | 4.044371000  | -3.842747000 | 0.248405000  |
| H | 2.384436000  | -3.956021000 | 0.887006000  |
| H | 2.663877000  | -3.864800000 | -0.878517000 |
| C | 1.007025000  | 2.302466000  | 0.068072000  |
| C | 0.554654000  | 2.937129000  | -1.261080000 |
| C | 0.124584000  | 2.815455000  | 1.222232000  |
| C | 2.449004000  | 2.745122000  | 0.339520000  |
| H | 1.171095000  | 2.575062000  | -2.088384000 |
| H | -0.488649000 | 2.710885000  | -1.473199000 |
| H | 0.672502000  | 4.022551000  | -1.200421000 |
| H | 0.236894000  | 3.899831000  | 1.307080000  |
| H | -0.925332000 | 2.586048000  | 1.049217000  |
| H | 0.434374000  | 2.367470000  | 2.170377000  |
| H | 2.824758000  | 2.348511000  | 1.286533000  |
| H | 3.125960000  | 2.439670000  | -0.462750000 |
| H | 2.479166000  | 3.835045000  | 0.401145000  |
| C | -4.443990000 | -0.695641000 | 1.129935000  |
| H | -4.390042000 | -1.351600000 | 2.000241000  |
| H | -5.480660000 | -0.593335000 | 0.800539000  |
| H | -4.031575000 | 0.287371000  | 1.377649000  |
| O | -3.759891000 | -0.534131000 | -1.040631000 |
| O | -3.669376000 | -1.327336000 | 0.134190000  |

Zero-point correction=  
(Hartree/Particle)

0.296988

|                                              |             |
|----------------------------------------------|-------------|
| Thermal correction to Energy=                | 0.315660    |
| Thermal correction to Enthalpy=              | 0.316604    |
| Thermal correction to Gibbs Free Energy=     | 0.246686    |
| Sum of electronic and zero-point Energies=   | -769.065556 |
| Sum of electronic and thermal Energies=      | -769.046884 |
| Sum of electronic and thermal Enthalpies=    | -769.045940 |
| Sum of electronic and thermal Free Energies= | -769.115858 |
